# Supplementary material for: Changes in the Arabidopsis RNA-binding proteome reveal novel stress response mechanisms
Source: PubMed Central journal article supplement (PMC6460520; doi:10.1186/s12870-019-1750-x), 2019-04-11

A

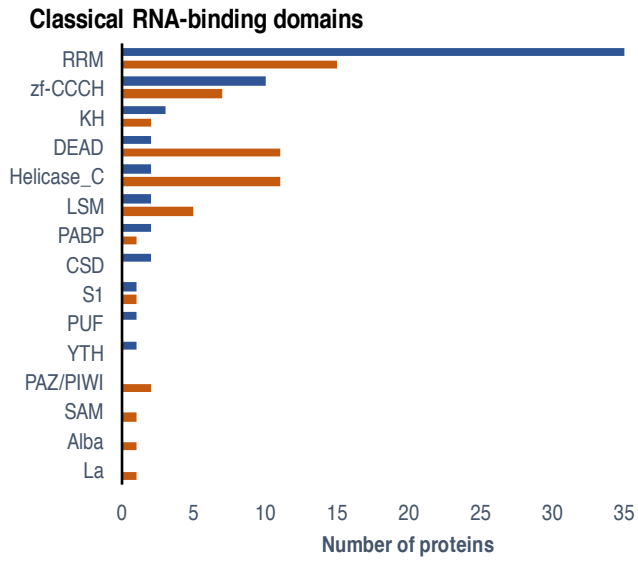

B

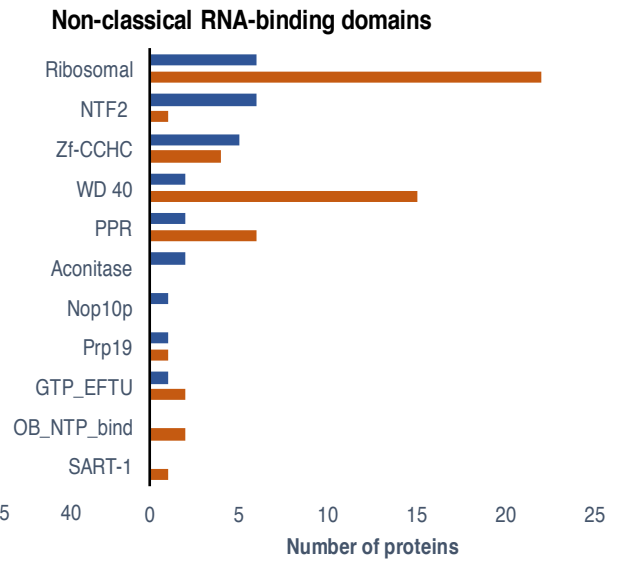

Supplement: 12870_2019_1750_MOESM3_ESM.pdf [file 12870_2019_1750_MOESM3_ESM.pdf]
