# Supplementary material for: Changes in the Arabidopsis RNA-binding proteome reveal novel stress response mechanisms
Source: BMC Plant Biol. 2019 Apr 11;19:139. doi: 10.1186/s12870-019-1750-x (PMC6460520; doi:10.1186/s12870-019-1750-x)
Supplement: Supplementary file 4 — Protein domains of the drought stress responsive proteins extracted from the pfam database (http://pfam.xfam.org; February 2017). (XLSX 154 kb) [file 12870_2019_1750_MOESM4_ESM.xlsx]

## Sheet: Supplementary Table 2
Table S2. Protein domains of the drought stress responsive proteins extracted from the pfam database (http://pfam.xfam.org; February 2017).
Protein ID and description	Alignment start	Alignment end	Envelope start	Envelope end	Domain accession	Domain name	Number of copies	Domain start	Domain end	Domain length	Bit score	E-value	Significance
AT1G01800.1 | Symbols: | NAD(P)-binding Rossmann-fold superfamily protein | chr1:293396-294888 FORWARD LENGTH=295	6	170	5	175	PF00106.23	adh_short	1	2	142	165	98.5	2.9e-28	1
AT1G02500.1 | Symbols: SAM1, SAM-1, MAT1, AtSAM1 | S-adenosylmethionine synthetase 1 | chr1:519037-520218 FORWARD LENGTH=393	4	101	3	101	PF00438.18	S-AdoMet_synt_N	1	2	99	98	144.7	9.9e-43	1
AT1G02500.1 | Symbols: SAM1, SAM-1, MAT1, AtSAM1 | S-adenosylmethionine synthetase 1 | chr1:519037-520218 FORWARD LENGTH=393	117	238	117	238	PF02772.14	S-AdoMet_synt_M	1	1	118	123	155.6	5.3e-46	1
AT1G02500.1 | Symbols: SAM1, SAM-1, MAT1, AtSAM1 | S-adenosylmethionine synthetase 1 | chr1:519037-520218 FORWARD LENGTH=393	240	381	240	382	PF02773.14	S-AdoMet_synt_C	1	1	137	142	199.4	2e-59	1
AT1G06670.1 | Symbols: NIH | nuclear DEIH-boxhelicase | chr1:2040567-2047333 FORWARD LENGTH=1576	23	76	19	76	PF01424.20	R3H	1	8	60	54	33.7	2.5e-08	1
AT1G06670.1 | Symbols: NIH | nuclear DEIH-boxhelicase | chr1:2040567-2047333 FORWARD LENGTH=1576	225	379	221	385	PF00270.27	DEAD	1	6	170	168	40.3	2.4e-10	1
AT1G06670.1 | Symbols: NIH | nuclear DEIH-boxhelicase | chr1:2040567-2047333 FORWARD LENGTH=1576	566	694	560	695	PF00271.29	Helicase_C	1	7	110	129	58.8	5.5e-16	1
AT1G06670.1 | Symbols: NIH | nuclear DEIH-boxhelicase | chr1:2040567-2047333 FORWARD LENGTH=1576	759	851	759	874	PF04408.21	HA2	1	1	101	101	59.2	3.8e-16	1
AT1G06670.1 | Symbols: NIH | nuclear DEIH-boxhelicase | chr1:2040567-2047333 FORWARD LENGTH=1576	891	1007	890	1007	PF07717.14	OB_NTP_bind	1	2	114	125	31.5	1.3e-07	1
AT1G07770.1 | Symbols: RPS15A | ribosomal protein S15A | chr1:2408413-2409065 REVERSE LENGTH=130	7	130	5	130	PF00410.17	Ribosomal_S8	1	3	127	132	78	5.1e-22	1
AT1G04810.1 | Symbols: | 26S proteasome regulatory complex, non-ATPase subcomplex, Rpn2/Psmd1 subunit | chr1:1350304-1355261 FORWARD LENGTH=1001	452	484	452	485	PF01851.20	PC_rep	2	1	34	34	22.5	9.8e-05	1
AT1G04810.1 | Symbols: | 26S proteasome regulatory complex, non-ATPase subcomplex, Rpn2/Psmd1 subunit | chr1:1350304-1355261 FORWARD LENGTH=1001	487	520	487	521	PF01851.20	PC_rep		1	34	34	27.4	2.6e-06	1
AT1G04810.1 | Symbols: | 26S proteasome regulatory complex, non-ATPase subcomplex, Rpn2/Psmd1 subunit | chr1:1350304-1355261 FORWARD LENGTH=1001	610	702	609	702	PF13646.4	HEAT_2	1	2	88	94	49.6	3.4e-13	1
AT1G08730.1 | Symbols: XIC, ATXIC | Myosin family protein with Dil domain | chr1:2779963-2788325 FORWARD LENGTH=1538	18	56	18	57	PF02736.17	Myosin_N	1	1	39	39	39.6	3e-10	1
AT1G08730.1 | Symbols: XIC, ATXIC | Myosin family protein with Dil domain | chr1:2779963-2788325 FORWARD LENGTH=1538	72	728	72	728	PF00063.19	Myosin_head	1	1	677	681	842.4	2.1e-253	1
AT1G08730.1 | Symbols: XIC, ATXIC | Myosin family protein with Dil domain | chr1:2779963-2788325 FORWARD LENGTH=1538	745	763	744	764	PF00612.25	IQ	2	2	20	19	12.6	0.084	1
AT1G08730.1 | Symbols: XIC, ATXIC | Myosin family protein with Dil domain | chr1:2779963-2788325 FORWARD LENGTH=1538	840	860	840	860	PF00612.25	IQ		1	21	21	13.8	0.033	1
AT1G08730.1 | Symbols: XIC, ATXIC | Myosin family protein with Dil domain | chr1:2779963-2788325 FORWARD LENGTH=1538	1356	1460	1356	1461	PF01843.17	DIL	1	1	103	105	86.9	8.8e-25	1
AT1G07790.1 | Symbols: HTB1 | Histone superfamily protein | chr1:2413049-2413495 FORWARD LENGTH=148	6	124	1	125	PF00125.22	Histone	1	7	131	125	79	3.8e-22	1
AT1G04510.1 | Symbols: MAC3A | MOS4-associated complex 3A | chr1:1226749-1230592 FORWARD LENGTH=523	66	131	65	132	PF08606.9	Prp19	1	2	67	66	107.3	2.5e-31	1
AT1G04510.1 | Symbols: MAC3A | MOS4-associated complex 3A | chr1:1226749-1230592 FORWARD LENGTH=523	254	291	254	291	PF00400.30	WD40	2	1	37	38	31.8	1.5e-07	1
AT1G04510.1 | Symbols: MAC3A | MOS4-associated complex 3A | chr1:1226749-1230592 FORWARD LENGTH=523	388	423	386	423	PF00400.30	WD40		3	38	37	18.5	0.0025	1
AT1G03330.1 | Symbols: | Small nuclear ribonucleoprotein family protein | chr1:818161-819297 REVERSE LENGTH=93	7	71	5	72	PF01423.20	LSM	1	3	66	65	61.5	4.2e-17	1
AT1G07140.1 | Symbols: SIRANBP | Pleckstrin homology (PH) domain superfamily protein | chr1:2192360-2193688 REVERSE LENGTH=228	39	156	38	160	PF00638.16	Ran_BP1	1	2	119	118	134.1	2.6e-39	1
AT1G08260.1 | Symbols: EMB142, EMB2284, POL2A, TIL1, EMB529, ABO4, ESD7 | DNA polymerase epsilon catalytic subunit | chr1:2590944-2606892 FORWARD LENGTH=2161	74	400	72	400	PF03104.17	DNA_pol_B_exo1	1	3	337	369	298	7.8e-89	1
AT1G08260.1 | Symbols: EMB142, EMB2284, POL2A, TIL1, EMB529, ABO4, ESD7 | DNA polymerase epsilon catalytic subunit | chr1:2590944-2606892 FORWARD LENGTH=2161	746	1076	727	1116	PF00136.19	DNA_pol_B	1	129	421	345	59.7	1.9e-16	1
AT1G08260.1 | Symbols: EMB142, EMB2284, POL2A, TIL1, EMB529, ABO4, ESD7 | DNA polymerase epsilon catalytic subunit | chr1:2590944-2606892 FORWARD LENGTH=2161	1509	1872	1501	1872	PF08490.10	DUF1744	1	28	396	371	380.7	5.5e-114	1
AT1G04820.1 | Symbols: TUA4, TOR2 | tubulin alpha-4 chain | chr1:1356421-1358266 REVERSE LENGTH=450	3	213	3	214	PF00091.23	Tubulin	1	1	196	211	228.3	8.6e-68	1
AT1G04820.1 | Symbols: TUA4, TOR2 | tubulin alpha-4 chain | chr1:1356421-1358266 REVERSE LENGTH=450	263	391	263	392	PF03953.15	Tubulin_C	1	1	124	129	169.2	3.9e-50	1
AT1G09140.1 | Symbols: ATSRP30, SR30, At-SR30 | SERINE-ARGININE PROTEIN 30 | chr1:2942887-2945818 REVERSE LENGTH=268	9	76	9	76	PF00076.20	RRM_1	2	1	70	70	62.3	2.5e-17	1
AT1G09140.1 | Symbols: ATSRP30, SR30, At-SR30 | SERINE-ARGININE PROTEIN 30 | chr1:2942887-2945818 REVERSE LENGTH=268	111	173	111	176	PF00076.20	RRM_1		1	66	66	41.1	1.1e-10	1
AT1G03457.2 | Symbols: | RNA-binding (RRM/RBD/RNP motifs) family protein | chr1:861109-864019 REVERSE LENGTH=438	14	78	14	83	PF00076.20	RRM_1	3	1	63	65	45	6.2e-12	1
AT1G03457.2 | Symbols: | RNA-binding (RRM/RBD/RNP motifs) family protein | chr1:861109-864019 REVERSE LENGTH=438	111	175	111	179	PF00076.20	RRM_1		1	65	65	54.5	6.8e-15	1
AT1G03457.2 | Symbols: | RNA-binding (RRM/RBD/RNP motifs) family protein | chr1:861109-864019 REVERSE LENGTH=438	341	411	341	411	PF00076.20	RRM_1		1	70	71	64	7.7e-18	1
AT1G04410.1 | Symbols: | Lactate/malate dehydrogenase family protein | chr1:1189418-1191267 REVERSE LENGTH=332	6	153	6	154	PF00056.21	Ldh_1_N	1	1	140	148	116.6	7.8e-34	1
AT1G04410.1 | Symbols: | Lactate/malate dehydrogenase family protein | chr1:1189418-1191267 REVERSE LENGTH=332	157	327	157	330	PF02866.16	Ldh_1_C	1	1	163	176	124.1	4.7e-36	1
AT1G04170.1 | Symbols: EIF2 GAMMA | eukaryotic translation initiation factor 2 gamma subunit | chr1:1097423-1099702 FORWARD LENGTH=465	33	237	31	238	PF00009.25	GTP_EFTU	1	3	193	229	85.4	3.3e-24	1
AT1G04170.1 | Symbols: EIF2 GAMMA | eukaryotic translation initiation factor 2 gamma subunit | chr1:1097423-1099702 FORWARD LENGTH=465	269	351	269	352	PF03144.23	GTP_EFTU_D2	1	1	73	84	40.7	2.1e-10	1
AT1G04170.1 | Symbols: EIF2 GAMMA | eukaryotic translation initiation factor 2 gamma subunit | chr1:1097423-1099702 FORWARD LENGTH=465	363	452	362	452	PF09173.9	eIF2_C	1	2	86	90	118.8	8.3e-35	1
AT1G09210.1 | Symbols: CRT1b, AtCRT1b | calreticulin 1b | chr1:2973217-2976655 REVERSE LENGTH=424	26	261	26	262	PF00262.16	Calreticulin	2	1	253	254	197.2	3.2e-58	1
AT1G09210.1 | Symbols: CRT1b, AtCRT1b | calreticulin 1b | chr1:2973217-2976655 REVERSE LENGTH=424	263	336	261	336	PF00262.16	Calreticulin		293	366	74	76.6	1.4e-21	1
AT1G09300.1 | Symbols: | Metallopeptidase M24 family protein | chr1:3003981-3008131 FORWARD LENGTH=493	57	172	57	173	PF05195.14	AMP_N	1	1	122	122	108.4	1.6e-31	1
AT1G09300.1 | Symbols: | Metallopeptidase M24 family protein | chr1:3003981-3008131 FORWARD LENGTH=493	219	440	218	440	PF00557.22	Peptidase_M24	1	2	209	230	173.3	4.7e-51	1
AT1G09560.1 | Symbols: GLP5 | germin-like protein 5 | chr1:3093896-3094639 FORWARD LENGTH=219	62	208	61	209	PF00190.20	Cupin_1	1	2	150	149	162.4	4.8e-48	1
AT1G09620.1 | Symbols: | ATP binding;leucine-tRNA ligases;aminoacyl-tRNA ligases;nucleotide binding;ATP binding;aminoacyl-tRNA ligases | chr1:3113077-3116455 REVERSE LENGTH=1091	22	104	20	137	PF00133.20	tRNA-synt_1	2	3	83	83	42.3	2.8e-11	1
AT1G09620.1 | Symbols: | ATP binding;leucine-tRNA ligases;aminoacyl-tRNA ligases;nucleotide binding;ATP binding;aminoacyl-tRNA ligases | chr1:3113077-3116455 REVERSE LENGTH=1091	189	754	171	755	PF00133.20	tRNA-synt_1		112	601	576	93.9	6.4e-27	1
AT1G09620.1 | Symbols: | ATP binding;leucine-tRNA ligases;aminoacyl-tRNA ligases;nucleotide binding;ATP binding;aminoacyl-tRNA ligases | chr1:3113077-3116455 REVERSE LENGTH=1091	793	914	793	931	PF08264.11	Anticodon_1	1	1	137	140	34.4	1.7e-08	1
AT1G04270.1 | Symbols: RPS15 | cytosolic ribosomal protein S15 | chr1:1141852-1142960 REVERSE LENGTH=152	50	135	50	135	PF00203.19	Ribosomal_S19	1	1	81	87	118.5	7.9e-35	1
AT1G09640.1 | Symbols: | Translation elongation factor EF1B, gamma chain | chr1:3120162-3122152 FORWARD LENGTH=414	5	76	1	76	PF02798.18	GST_N	1	5	76	73	54.2	1.2e-14	1
AT1G09640.1 | Symbols: | Translation elongation factor EF1B, gamma chain | chr1:3120162-3122152 FORWARD LENGTH=414	132	197	109	197	PF00043.23	GST_C	1	29	93	66	42.8	4.1e-11	1
AT1G09640.1 | Symbols: | Translation elongation factor EF1B, gamma chain | chr1:3120162-3122152 FORWARD LENGTH=414	253	360	253	361	PF00647.17	EF1G	1	1	106	108	133.5	2.6e-39	1
AT1G09780.1 | Symbols: | Phosphoglycerate mutase, 2,3-bisphosphoglycerate-independent | chr1:3165550-3167812 REVERSE LENGTH=557	19	542	19	544	PF01676.16	Metalloenzyme	1	1	243	533	330.1	6.4e-99	1
AT1G09780.1 | Symbols: | Phosphoglycerate mutase, 2,3-bisphosphoglycerate-independent | chr1:3165550-3167812 REVERSE LENGTH=557	101	321	100	322	PF06415.11	iPGM_N	1	2	214	223	190.7	2.1e-56	1
AT1G10270.1 | Symbols: GRP23 | glutamine-rich protein 23 | chr1:3363535-3366276 FORWARD LENGTH=913	211	240	210	242	PF12854.5	PPR_1	1	2	31	30	37	1.8e-09	1
AT1G10270.1 | Symbols: GRP23 | glutamine-rich protein 23 | chr1:3363535-3366276 FORWARD LENGTH=913	253	282	253	283	PF01535.18	PPR	4	1	30	30	16.6	0.0061	1
AT1G10270.1 | Symbols: GRP23 | glutamine-rich protein 23 | chr1:3363535-3366276 FORWARD LENGTH=913	289	316	288	317	PF01535.18	PPR		2	29	28	25.1	1.2e-05	1
AT1G10270.1 | Symbols: GRP23 | glutamine-rich protein 23 | chr1:3363535-3366276 FORWARD LENGTH=913	361	386	361	387	PF01535.18	PPR		4	29	26	14.2	0.035	1
AT1G10270.1 | Symbols: GRP23 | glutamine-rich protein 23 | chr1:3363535-3366276 FORWARD LENGTH=913	476	499	473	502	PF01535.18	PPR		5	28	24	18.7	0.0013	1
AT1G11860.1 | Symbols: | Glycine cleavage T-protein family | chr1:4001801-4003245 FORWARD LENGTH=408	41	296	41	296	PF01571.19	GCV_T	1	1	257	260	288.4	4e-86	1
AT1G11860.1 | Symbols: | Glycine cleavage T-protein family | chr1:4001801-4003245 FORWARD LENGTH=408	305	397	305	397	PF08669.9	GCV_T_C	1	1	95	95	82.9	1.3e-23	1
AT1G11650.2 | Symbols: ATRBP45B, RBP45B | RNA-binding (RRM/RBD/RNP motifs) family protein | chr1:3914895-3917941 FORWARD LENGTH=405	64	130	64	133	PF00076.20	RRM_1	3	1	66	67	43.3	2.2e-11	1
AT1G11650.2 | Symbols: ATRBP45B, RBP45B | RNA-binding (RRM/RBD/RNP motifs) family protein | chr1:3914895-3917941 FORWARD LENGTH=405	157	220	157	228	PF00076.20	RRM_1		1	62	64	50.4	1.3e-13	1
AT1G11650.2 | Symbols: ATRBP45B, RBP45B | RNA-binding (RRM/RBD/RNP motifs) family protein | chr1:3914895-3917941 FORWARD LENGTH=405	263	327	263	327	PF00076.20	RRM_1		1	70	70	59.1	2.5e-16	1
AT1G11910.1 | Symbols: APA1, ATAPA1 | aspartic proteinase A1 | chr1:4017119-4019874 REVERSE LENGTH=506	81	505	81	505	PF00026.21	Asp	1	1	315	425	447.9	1.9e-134	1
AT1G11910.1 | Symbols: APA1, ATAPA1 | aspartic proteinase A1 | chr1:4017119-4019874 REVERSE LENGTH=506	315	348	315	348	PF03489.15	SapB_2	1	1	34	34	53.8	1.4e-14	1
AT1G11910.1 | Symbols: APA1, ATAPA1 | aspartic proteinase A1 | chr1:4017119-4019874 REVERSE LENGTH=506	379	415	378	415	PF05184.13	SapB_1	1	2	38	37	51.7	5.6e-14	1
AT1G13020.1 | Symbols: EIF4B2 | eukaryotic initiation factor 4B2 | chr1:4440927-4443520 REVERSE LENGTH=549	1	532	1	532	PF06273.9	eIF-4B	1	1	502	540	825.4	2e-248	1
AT1G10840.1 | Symbols: TIF3H1 | translation initiation factor 3 subunit H1 | chr1:3607885-3610299 REVERSE LENGTH=337	23	127	20	131	PF01398.19	JAB	1	4	117	114	51.2	9.7e-14	1
AT1G13190.1 | Symbols: | RNA-binding (RRM/RBD/RNP motifs) family protein | chr1:4499633-4501354 FORWARD LENGTH=573	204	272	204	274	PF00076.20	RRM_1	1	1	68	69	54.3	8.2e-15	1
AT1G12270.1 | Symbols: Hop1 | stress-inducible protein, putative | chr1:4172105-4174575 FORWARD LENGTH=572	72	103	70	103	PF13181.4	TPR_8	1	3	34	32	17.2	0.0037	1
AT1G12270.1 | Symbols: Hop1 | stress-inducible protein, putative | chr1:4172105-4174575 FORWARD LENGTH=572	251	292	251	306	PF13414.4	TPR_11	2	1	42	42	33.7	1.9e-08	1
AT1G12270.1 | Symbols: Hop1 | stress-inducible protein, putative | chr1:4172105-4174575 FORWARD LENGTH=572	390	431	390	431	PF13414.4	TPR_11		1	42	42	36.4	2.8e-09	1
AT1G10170.1 | Symbols: ATNFXL1, NFXL1 | NF-X-like 1 | chr1:3333925-3337491 REVERSE LENGTH=1188	337	352	335	352	PF01422.15	zf-NF-X1	9	4	19	16	6.4	8.8	1
AT1G10170.1 | Symbols: ATNFXL1, NFXL1 | NF-X-like 1 | chr1:3333925-3337491 REVERSE LENGTH=1188	390	407	390	408	PF01422.15	zf-NF-X1		1	18	18	25.5	8.9e-06	1
AT1G10170.1 | Symbols: ATNFXL1, NFXL1 | NF-X-like 1 | chr1:3333925-3337491 REVERSE LENGTH=1188	454	471	454	472	PF01422.15	zf-NF-X1		1	18	18	22.6	7.4e-05	1
AT1G10170.1 | Symbols: ATNFXL1, NFXL1 | NF-X-like 1 | chr1:3333925-3337491 REVERSE LENGTH=1188	515	530	513	531	PF01422.15	zf-NF-X1		3	18	16	19.8	0.00055	1
AT1G10170.1 | Symbols: ATNFXL1, NFXL1 | NF-X-like 1 | chr1:3333925-3337491 REVERSE LENGTH=1188	572	583	572	583	PF01422.15	zf-NF-X1		1	12	12	5.3	20	1
AT1G10170.1 | Symbols: ATNFXL1, NFXL1 | NF-X-like 1 | chr1:3333925-3337491 REVERSE LENGTH=1188	611	628	611	629	PF01422.15	zf-NF-X1		1	18	18	22.1	0.0001	1
AT1G10170.1 | Symbols: ATNFXL1, NFXL1 | NF-X-like 1 | chr1:3333925-3337491 REVERSE LENGTH=1188	675	685	668	685	PF01422.15	zf-NF-X1		9	19	11	4.7	28	1
AT1G10170.1 | Symbols: ATNFXL1, NFXL1 | NF-X-like 1 | chr1:3333925-3337491 REVERSE LENGTH=1188	721	736	721	737	PF01422.15	zf-NF-X1		1	16	16	16.2	0.0074	1
AT1G10170.1 | Symbols: ATNFXL1, NFXL1 | NF-X-like 1 | chr1:3333925-3337491 REVERSE LENGTH=1188	753	779	753	780	PF01422.15	zf-NF-X1		1	18	27	13.6	0.047	1
AT1G13730.1 | Symbols: | Nuclear transport factor 2 (NTF2) family protein with RNA binding (RRM-RBD-RNP motifs) domain | chr1:4710519-4712332 FORWARD LENGTH=428	15	131	15	131	PF02136.18	NTF2	1	1	120	124	107.9	4.2e-31	1
AT1G13730.1 | Symbols: | Nuclear transport factor 2 (NTF2) family protein with RNA binding (RRM-RBD-RNP motifs) domain | chr1:4710519-4712332 FORWARD LENGTH=428	279	337	279	350	PF00076.20	RRM_1	1	1	58	60	32	7.3e-08	1
AT1G14610.1 | Symbols: TWN2, VALRS | valyl-tRNA synthetase / valine--tRNA ligase (VALRS) | chr1:5008502-5014486 REVERSE LENGTH=1108	149	771	148	772	PF00133.20	tRNA-synt_1	1	2	601	663	685.5	4.9e-206	1
AT1G14610.1 | Symbols: TWN2, VALRS | valyl-tRNA synthetase / valine--tRNA ligase (VALRS) | chr1:5008502-5014486 REVERSE LENGTH=1108	817	963	816	973	PF08264.11	Anticodon_1	1	2	143	148	127.9	2.7e-37	1
AT1G15280.2 | Symbols: | CASC3/Barentsz eIF4AIII binding | chr1:5252538-5256214 FORWARD LENGTH=585	73	178	62	180	PF09405.8	Btz	1	8	127	122	72.2	4.2e-20	1
AT1G15340.1 | Symbols: MBD10 | methyl-CPG-binding domain 10 | chr1:5275895-5277474 REVERSE LENGTH=384	9	74	4	77	PF01429.17	MBD	1	6	74	69	51	7.8e-14	1
AT1G15480.1 | Symbols: | Tetratricopeptide repeat (TPR)-like superfamily protein | chr1:5318307-5320422 FORWARD LENGTH=594	249	307	248	309	PF13812.4	PPR_3	2	2	61	60	27.9	1.6e-06	1
AT1G15480.1 | Symbols: | Tetratricopeptide repeat (TPR)-like superfamily protein | chr1:5318307-5320422 FORWARD LENGTH=594	341	360	337	362	PF01535.18	PPR	3	10	29	20	11.3	0.3	1
AT1G15480.1 | Symbols: | Tetratricopeptide repeat (TPR)-like superfamily protein | chr1:5318307-5320422 FORWARD LENGTH=594	435	464	435	464	PF01535.18	PPR		2	31	30	15.6	0.013	1
AT1G15480.1 | Symbols: | Tetratricopeptide repeat (TPR)-like superfamily protein | chr1:5318307-5320422 FORWARD LENGTH=594	470	489	469	497	PF01535.18	PPR		2	21	20	10	0.78	1
AT1G15480.1 | Symbols: | Tetratricopeptide repeat (TPR)-like superfamily protein | chr1:5318307-5320422 FORWARD LENGTH=594	494	551	490	552	PF13812.4	PPR_3		5	62	58	20.1	0.00044	1
AT1G15690.1 | Symbols: AVP1, ATAVP3, AVP-3, AtVHP1;1 | Inorganic H pyrophosphatase family protein | chr1:5399115-5402185 FORWARD LENGTH=770	23	755	21	755	PF03030.14	H_PPase	1	3	650	735	862.5	2.1e-259	1
AT1G15810.1 | Symbols: | S15/NS1, RNA-binding protein | chr1:5444496-5446271 FORWARD LENGTH=419	336	412	335	412	PF00312.20	Ribosomal_S15	1	3	81	79	82.4	1.8e-23	1
AT1G15750.1 | Symbols: WSIP1, TPL | Transducin family protein / WD-40 repeat family protein | chr1:5415086-5420359 REVERSE LENGTH=1131	458	492	450	492	PF00400.30	WD40	2	7	38	35	22.4	0.00015	1
AT1G15750.1 | Symbols: WSIP1, TPL | Transducin family protein / WD-40 repeat family protein | chr1:5415086-5420359 REVERSE LENGTH=1131	914	947	909	947	PF00400.30	WD40		6	38	34	16.8	0.0082	1
AT1G15440.1 | Symbols: PWP2, ATPWP2 | periodic tryptophan protein 2 | chr1:5306159-5309460 REVERSE LENGTH=900	386	417	377	417	PF00400.30	WD40	4	8	38	32	34.6	1.9e-08	1
AT1G15440.1 | Symbols: PWP2, ATPWP2 | periodic tryptophan protein 2 | chr1:5306159-5309460 REVERSE LENGTH=900	421	459	421	459	PF00400.30	WD40		1	38	39	23	9e-05	1
AT1G15440.1 | Symbols: PWP2, ATPWP2 | periodic tryptophan protein 2 | chr1:5306159-5309460 REVERSE LENGTH=900	509	545	507	545	PF00400.30	WD40		3	38	37	28.5	1.7e-06	1
AT1G15440.1 | Symbols: PWP2, ATPWP2 | periodic tryptophan protein 2 | chr1:5306159-5309460 REVERSE LENGTH=900	555	587	551	587	PF00400.30	WD40		6	38	34	17.9	0.0037	1
AT1G15440.1 | Symbols: PWP2, ATPWP2 | periodic tryptophan protein 2 | chr1:5306159-5309460 REVERSE LENGTH=900	790	895	790	895	PF04003.10	Utp12	1	1	107	107	91.3	3.8e-26	1
AT1G09770.1 | Symbols: ATCDC5, CDC5, ATMYBCDC5 | cell division cycle 5 | chr1:3162002-3165122 FORWARD LENGTH=844	10	70	10	70	PF13921.4	Myb_DNA-bind_6	1	1	60	61	49.2	4.3e-13	1
AT1G09770.1 | Symbols: ATCDC5, CDC5, ATMYBCDC5 | cell division cycle 5 | chr1:3162002-3165122 FORWARD LENGTH=844	407	655	407	656	PF11831.6	Myb_Cef	1	1	237	259	196.1	6e-58	1
AT1G14900.1 | Symbols: HMGA | high mobility group A | chr1:5138665-5139353 REVERSE LENGTH=204	24	85	23	89	PF00538.17	Linker_histone	1	2	64	63	38.7	8.5e-10	1
AT1G16350.1 | Symbols: | Aldolase-type TIM barrel family protein | chr1:5590951-5592872 FORWARD LENGTH=502	19	492	19	492	PF00478.23	IMPDH	1	1	345	474	403.5	6.2e-121	1
AT1G13440.1 | Symbols: GAPC-2, GAPC2 | glyceraldehyde-3-phosphate dehydrogenase C2 | chr1:4608465-4610494 REVERSE LENGTH=338	6	109	6	109	PF00044.22	Gp_dh_N	1	1	101	104	116.4	5.7e-34	1
AT1G13440.1 | Symbols: GAPC-2, GAPC2 | glyceraldehyde-3-phosphate dehydrogenase C2 | chr1:4608465-4610494 REVERSE LENGTH=338	161	318	161	318	PF02800.18	Gp_dh_C	1	1	158	158	238.8	1.7e-71	1
AT1G02930.1 | Symbols: ATGSTF6, GST1, ERD11, ATGSTF3, GSTF6, ATGST1 | glutathione S-transferase 6 | chr1:661363-662191 REVERSE LENGTH=208	3	76	2	77	PF02798.18	GST_N	1	2	75	74	77	9.2e-22	1
AT1G02930.1 | Symbols: ATGSTF6, GST1, ERD11, ATGSTF3, GSTF6, ATGST1 | glutathione S-transferase 6 | chr1:661363-662191 REVERSE LENGTH=208	118	202	96	202	PF00043.23	GST_C	1	12	93	85	59.8	2.1e-16	1
AT1G02920.1 | Symbols: ATGSTF7, GST11, ATGSTF8, GSTF7, ATGST11 | glutathione S-transferase 7 | chr1:658886-659705 REVERSE LENGTH=209	3	76	2	77	PF02798.18	GST_N	1	2	75	74	76.3	1.6e-21	1
AT1G02920.1 | Symbols: ATGSTF7, GST11, ATGSTF8, GSTF7, ATGST11 | glutathione S-transferase 7 | chr1:658886-659705 REVERSE LENGTH=209	119	203	97	203	PF00043.23	GST_C	1	12	93	85	61.5	6.1e-17	1
AT1G14170.3 | Symbols: | RNA-binding KH domain-containing protein | chr1:4843463-4845253 REVERSE LENGTH=479	46	98	45	102	PF00013.27	KH_1	4	2	55	55	33	3.5e-08	1
AT1G14170.3 | Symbols: | RNA-binding KH domain-containing protein | chr1:4843463-4845253 REVERSE LENGTH=479	147	215	147	217	PF00013.27	KH_1		1	64	71	52.3	3.3e-14	1
AT1G14170.3 | Symbols: | RNA-binding KH domain-containing protein | chr1:4843463-4845253 REVERSE LENGTH=479	273	320	271	335	PF00013.27	KH_1		4	52	49	41.8	6.4e-11	1
AT1G14170.3 | Symbols: | RNA-binding KH domain-containing protein | chr1:4843463-4845253 REVERSE LENGTH=479	356	422	355	424	PF00013.27	KH_1		2	64	67	54	9.6e-15	1
AT1G16470.1 | Symbols: PAB1 | proteasome subunit PAB1 | chr1:5623122-5625439 FORWARD LENGTH=235	6	28	6	28	PF10584.7	Proteasome_A_N	1	1	23	23	34.5	1.1e-08	1
AT1G16470.1 | Symbols: PAB1 | proteasome subunit PAB1 | chr1:5623122-5625439 FORWARD LENGTH=235	31	213	29	213	PF00227.24	Proteasome	1	3	190	188	209.5	2.7e-62	1
AT1G17170.1 | Symbols: ATGSTU24, GST, GSTU24 | glutathione S-transferase TAU 24 | chr1:5869895-5870691 FORWARD LENGTH=218	5	76	3	76	PF02798.18	GST_N	1	3	76	75	53.4	2.2e-14	1
AT1G17170.1 | Symbols: ATGSTU24, GST, GSTU24 | glutathione S-transferase TAU 24 | chr1:5869895-5870691 FORWARD LENGTH=218	122	187	92	187	PF13410.4	GST_C_2	1	6	70	68	36.2	3.9e-09	1
AT1G17210.1 | Symbols: ATILP1, ILP1 | IAP-like protein 1 | chr1:5880502-5884657 REVERSE LENGTH=958	84	209	83	212	PF07967.11	zf-C3HC	1	2	131	130	114.1	3.8e-33	1
AT1G19870.1 | Symbols: iqd32 | IQ-domain 32 | chr1:6895400-6898539 REVERSE LENGTH=794	218	234	215	235	PF00612.25	IQ	2	4	20	17	20.1	0.00032	1
AT1G19870.1 | Symbols: iqd32 | IQ-domain 32 | chr1:6895400-6898539 REVERSE LENGTH=794	238	255	237	256	PF00612.25	IQ		2	19	18	17.3	0.0026	1
AT1G19870.1 | Symbols: iqd32 | IQ-domain 32 | chr1:6895400-6898539 REVERSE LENGTH=794	717	785	703	791	PF13178.4	DUF4005	1	19	88	72	35.7	9e-09	1
AT1G20620.1 | Symbols: CAT3, SEN2, ATCAT3 | catalase 3 | chr1:7143142-7146193 FORWARD LENGTH=492	18	398	18	399	PF00199.17	Catalase	1	1	381	382	569	4.4e-171	1
AT1G20620.1 | Symbols: CAT3, SEN2, ATCAT3 | catalase 3 | chr1:7143142-7146193 FORWARD LENGTH=492	423	486	421	486	PF06628.10	Catalase-rel	1	3	65	65	55	6.3e-15	1
AT1G18070.3 | Symbols: | Translation elongation factor EF1A/initiation factor IF2gamma family protein | chr1:6214236-6218211 REVERSE LENGTH=543	99	312	99	445	PF00009.25	GTP_EFTU	1	1	183	223	151.6	1.7e-44	1
AT1G18070.3 | Symbols: | Translation elongation factor EF1A/initiation factor IF2gamma family protein | chr1:6214236-6218211 REVERSE LENGTH=543	354	420	354	421	PF03144.23	GTP_EFTU_D2	1	1	73	73	37.7	1.8e-09	1
AT1G18070.3 | Symbols: | Translation elongation factor EF1A/initiation factor IF2gamma family protein | chr1:6214236-6218211 REVERSE LENGTH=543	427	536	426	537	PF03143.15	GTP_EFTU_D3	1	2	110	110	113.5	5.5e-33	1
AT1G20440.1 | Symbols: COR47, RD17, AtCOR47 | cold-regulated 47 | chr1:7084722-7085664 REVERSE LENGTH=265	50	198	2	198	PF00257.17	Dehydrin	2	39	168	153	68.7	7.6e-19	1
AT1G20440.1 | Symbols: COR47, RD17, AtCOR47 | cold-regulated 47 | chr1:7084722-7085664 REVERSE LENGTH=265	221	249	199	249	PF00257.17	Dehydrin		145	168	29	26.7	6.3e-06	1
AT1G20880.1 | Symbols: | RNA-binding (RRM/RBD/RNP motifs) family protein | chr1:7262879-7264834 REVERSE LENGTH=274	26	81	26	85	PF00076.20	RRM_1	1	1	55	56	61.9	3.5e-17	1
AT1G20110.1 | Symbols: | RING/FYVE/PHD zinc finger superfamily protein | chr1:6971554-6974578 FORWARD LENGTH=601	451	515	450	516	PF01363.19	FYVE	1	2	67	66	72.9	1.6e-20	1
AT1G16700.1 | Symbols: | Alpha-helical ferredoxin | chr1:5710012-5711694 FORWARD LENGTH=222	122	176	122	176	PF12838.5	Fer4_7	1	1	52	55	50.2	2.6e-13	1
AT1G17180.1 | Symbols: ATGSTU25, GSTU25 | glutathione S-transferase TAU 25 | chr1:5872208-5872958 FORWARD LENGTH=221	5	76	3	76	PF02798.18	GST_N	1	3	76	75	50.9	1.3e-13	1
AT1G17180.1 | Symbols: ATGSTU25, GSTU25 | glutathione S-transferase TAU 25 | chr1:5872208-5872958 FORWARD LENGTH=221	122	185	113	188	PF13410.4	GST_C_2	1	5	67	65	45.1	6.3e-12	1
AT1G20230.1 | Symbols: | Pentatricopeptide repeat (PPR) superfamily protein | chr1:7009570-7011852 FORWARD LENGTH=760	82	112	82	112	PF01535.18	PPR	5	1	31	31	12.2	0.16	1
AT1G20230.1 | Symbols: | Pentatricopeptide repeat (PPR) superfamily protein | chr1:7009570-7011852 FORWARD LENGTH=760	181	227	178	230	PF13812.4	PPR_3	1	14	60	47	29	7.6e-07	1
AT1G20230.1 | Symbols: | Pentatricopeptide repeat (PPR) superfamily protein | chr1:7009570-7011852 FORWARD LENGTH=760	291	313	289	317	PF01535.18	PPR		4	26	23	9.7	0.94	1
AT1G20230.1 | Symbols: | Pentatricopeptide repeat (PPR) superfamily protein | chr1:7009570-7011852 FORWARD LENGTH=760	321	346	319	348	PF01535.18	PPR		3	28	26	18.8	0.0012	1
AT1G20230.1 | Symbols: | Pentatricopeptide repeat (PPR) superfamily protein | chr1:7009570-7011852 FORWARD LENGTH=760	352	398	351	400	PF13041.4	PPR_2	2	2	48	47	39	6.3e-10	1
AT1G20230.1 | Symbols: | Pentatricopeptide repeat (PPR) superfamily protein | chr1:7009570-7011852 FORWARD LENGTH=760	452	499	452	501	PF13041.4	PPR_2		1	48	48	32.4	7.1e-08	1
AT1G20230.1 | Symbols: | Pentatricopeptide repeat (PPR) superfamily protein | chr1:7009570-7011852 FORWARD LENGTH=760	527	551	526	554	PF01535.18	PPR		2	26	25	20.5	0.00034	1
AT1G20230.1 | Symbols: | Pentatricopeptide repeat (PPR) superfamily protein | chr1:7009570-7011852 FORWARD LENGTH=760	593	622	592	622	PF01535.18	PPR		2	31	30	10.4	0.56	1
AT1G20230.1 | Symbols: | Pentatricopeptide repeat (PPR) superfamily protein | chr1:7009570-7011852 FORWARD LENGTH=760	626	750	626	750	PF14432.4	DYW_deaminase	1	1	127	127	170.1	1.6e-50	1
AT1G20950.1 | Symbols: | Phosphofructokinase family protein | chr1:7297467-7301336 REVERSE LENGTH=614	88	453	88	456	PF00365.18	PFK	1	1	276	367	91.1	7e-26	1
AT1G21610.3 | Symbols: | wound-responsive family protein | chr1:7574104-7578643 FORWARD LENGTH=685	116	164	113	164	PF08729.8	HUN	1	4	52	49	54.4	8.4e-15	1
AT1G24510.1 | Symbols: | TCP-1/cpn60 chaperonin family protein | chr1:8685504-8688101 REVERSE LENGTH=535	40	532	40	534	PF00118.22	Cpn60_TCP1	1	1	489	493	530	4.8e-159	1
AT1G27130.1 | Symbols: ATGSTU13, GST12, GSTU13 | glutathione S-transferase tau 13 | chr1:9425582-9426597 FORWARD LENGTH=227	9	83	9	91	PF13417.4	GST_N_3	1	1	72	75	52.3	5.2e-14	1
AT1G27130.1 | Symbols: ATGSTU13, GST12, GSTU13 | glutathione S-transferase tau 13 | chr1:9425582-9426597 FORWARD LENGTH=227	101	203	93	204	PF00043.23	GST_C	1	9	92	103	24.3	2.5e-05	1
AT1G26110.1 | Symbols: DCP5 | decapping 5 | chr1:9024616-9027556 REVERSE LENGTH=611	17	89	16	91	PF12701.5	LSM14	1	2	73	73	110.7	2.4e-32	1
AT1G26110.1 | Symbols: DCP5 | decapping 5 | chr1:9024616-9027556 REVERSE LENGTH=611	459	553	459	554	PF09532.8	FDF	1	1	103	103	81.2	7.7e-23	1
AT1G27310.1 | Symbols: NTF2A | nuclear transport factor 2A | chr1:9484615-9485790 REVERSE LENGTH=122	6	119	6	119	PF02136.18	NTF2	1	1	120	120	127.2	4.1e-37	1
AT1G27450.3 | Symbols: APT1 | adenine phosphoribosyl transferase 1 | chr1:9532042-9533807 FORWARD LENGTH=284	129	276	111	282	PF00156.25	Pribosyltran	1	20	140	151	60.9	9.4e-17	1
AT1G27950.1 | Symbols: LTPG1 | glycosylphosphatidylinositol-anchored lipid protein transfer 1 | chr1:9740740-9741991 FORWARD LENGTH=193	17	116	10	116	PF14368.4	LTP_2	1	4	96	100	48.4	6.8e-13	1
AT1G28110.1 | Symbols: SCPL45 | serine carboxypeptidase-like 45 | chr1:9804153-9806832 REVERSE LENGTH=461	37	453	36	454	PF00450.20	Peptidase_S10	1	2	418	434	414	8.7e-124	1
AT1G25490.1 | Symbols: RCN1, REGA, ATB BETA BETA, EER1 | ARM repeat superfamily protein | chr1:8951700-8954899 FORWARD LENGTH=588	242	270	242	272	PF02985.20	HEAT	1	1	29	29	21.2	0.00019	1
AT1G25490.1 | Symbols: RCN1, REGA, ATB BETA BETA, EER1 | ARM repeat superfamily protein | chr1:8951700-8954899 FORWARD LENGTH=588	361	461	360	461	PF13646.4	HEAT_2	1	2	88	102	43.8	2.3e-11	1
AT1G28230.1 | Symbols: PUP1, ATPUP1 | purine permease 1 | chr1:9862200-9864554 REVERSE LENGTH=356	5	334	4	334	PF16913.3	PUNUT	1	2	322	330	444.8	1.5e-133	1
AT1G28130.1 | Symbols: GH3.17 | Auxin-responsive GH3 family protein | chr1:9825431-9827883 FORWARD LENGTH=609	17	579	16	580	PF03321.11	GH3	1	2	525	571	696.3	2.7e-209	1
AT1G25350.2 | Symbols: OVA9 | glutamine-tRNA ligase, putative / glutaminyl-tRNA synthetase, putative / GlnRS, putative | chr1:8889280-8894205 REVERSE LENGTH=800	9	167	9	167	PF04558.13	tRNA_synt_1c_R1	1	1	162	162	190.7	1.6e-56	1
AT1G25350.2 | Symbols: OVA9 | glutamine-tRNA ligase, putative / glutaminyl-tRNA synthetase, putative / GlnRS, putative | chr1:8889280-8894205 REVERSE LENGTH=800	170	263	170	263	PF04557.13	tRNA_synt_1c_R2	1	1	97	105	47.3	2.7e-12	1
AT1G25350.2 | Symbols: OVA9 | glutamine-tRNA ligase, putative / glutaminyl-tRNA synthetase, putative / GlnRS, putative | chr1:8889280-8894205 REVERSE LENGTH=800	270	580	270	581	PF00749.19	tRNA-synt_1c	1	1	313	319	352.5	1.4e-105	1
AT1G25350.2 | Symbols: OVA9 | glutamine-tRNA ligase, putative / glutaminyl-tRNA synthetase, putative / GlnRS, putative | chr1:8889280-8894205 REVERSE LENGTH=800	583	775	583	775	PF03950.16	tRNA-synt_1c_C	1	1	174	196	145.4	1.4e-42	1
AT1G29880.1 | Symbols: | glycyl-tRNA synthetase / glycine--tRNA ligase | chr1:10459662-10462781 REVERSE LENGTH=729	57	95	55	101	PF00458.18	WHEP-TRS	1	4	42	39	38.8	6.8e-10	1
AT1G29880.1 | Symbols: | glycyl-tRNA synthetase / glycine--tRNA ligase | chr1:10459662-10462781 REVERSE LENGTH=729	292	590	291	591	PF00587.23	tRNA-synt_2b	1	12	178	301	43.5	3e-11	1
AT1G29880.1 | Symbols: | glycyl-tRNA synthetase / glycine--tRNA ligase | chr1:10459662-10462781 REVERSE LENGTH=729	617	703	617	704	PF03129.18	HGTP_anticodon	1	1	92	92	70.2	1.2e-19	1
AT1G29900.1 | Symbols: CARB | carbamoyl phosphate synthetase B | chr1:10468164-10471976 FORWARD LENGTH=1187	219	426	219	427	PF02786.15	CPSase_L_D2	2	1	210	214	240.4	1.2e-71	1
AT1G29900.1 | Symbols: CARB | carbamoyl phosphate synthetase B | chr1:10468164-10471976 FORWARD LENGTH=1187	519	638	517	638	PF02787.17	CPSase_L_D3	1	3	123	122	142.4	7.2e-42	1
AT1G29900.1 | Symbols: CARB | carbamoyl phosphate synthetase B | chr1:10468164-10471976 FORWARD LENGTH=1187	777	980	777	982	PF02786.15	CPSase_L_D2		1	209	211	131.3	3.1e-38	1
AT1G29900.1 | Symbols: CARB | carbamoyl phosphate synthetase B | chr1:10468164-10471976 FORWARD LENGTH=1187	1062	1148	1061	1148	PF02142.20	MGS	1	2	95	94	62.9	2.2e-17	1
AT1G29980.1 | Symbols: | Protein of unknown function, DUF642 | chr1:10503411-10505994 REVERSE LENGTH=407	39	204	39	204	PF04862.10	DUF642	2	1	157	166	216.8	1.1e-64	1
AT1G29980.1 | Symbols: | Protein of unknown function, DUF642 | chr1:10503411-10505994 REVERSE LENGTH=407	216	382	215	383	PF04862.10	DUF642		2	156	176	68.2	6.1e-19	1
AT1G30230.2 | Symbols: | Glutathione S-transferase, C-terminal-like;Translation elongation factor EF1B/ribosomal protein S6 | chr1:10639286-10640601 FORWARD LENGTH=260	144	231	144	231	PF00736.17	EF1_GNE	1	1	90	90	116.1	5.2e-34	1
AT1G31280.1 | Symbols: AGO2 | Argonaute family protein | chr1:11181777-11185112 FORWARD LENGTH=1014	174	306	174	306	PF16486.3	ArgoN	1	1	129	140	83.8	1.5e-23	1
AT1G31280.1 | Symbols: AGO2 | Argonaute family protein | chr1:11181777-11185112 FORWARD LENGTH=1014	316	366	316	366	PF08699.8	ArgoL1	1	1	51	51	32.9	3.2e-08	1
AT1G31280.1 | Symbols: AGO2 | Argonaute family protein | chr1:11181777-11185112 FORWARD LENGTH=1014	381	491	371	496	PF02170.20	PAZ	1	13	128	121	70.9	7.9e-20	1
AT1G31280.1 | Symbols: AGO2 | Argonaute family protein | chr1:11181777-11185112 FORWARD LENGTH=1014	509	555	509	556	PF16488.3	ArgoL2	1	1	46	47	38.5	9.7e-10	1
AT1G31280.1 | Symbols: AGO2 | Argonaute family protein | chr1:11181777-11185112 FORWARD LENGTH=1014	669	962	665	965	PF02171.15	Piwi	1	4	298	300	276.5	2.2e-82	1
AT1G31730.1 | Symbols: | Adaptin family protein | chr1:11359907-11363916 FORWARD LENGTH=938	58	594	42	597	PF01602.18	Adaptin_N	1	15	521	545	276.3	4.2e-82	1
AT1G31812.1 | Symbols: ACBP6, ACBP | acyl-CoA-binding protein 6 | chr1:11411132-11412099 REVERSE LENGTH=92	5	83	4	84	PF00887.17	ACBP	1	2	84	83	100.6	3.9e-29	1
AT1G32790.2 | Symbols: CID11 | CTC-interacting domain 11 | chr1:11875028-11877188 REVERSE LENGTH=406	89	104	88	105	PF07145.13	PAM2	1	2	17	16	24.3	1.4e-05	1
AT1G32790.2 | Symbols: CID11 | CTC-interacting domain 11 | chr1:11875028-11877188 REVERSE LENGTH=406	175	237	175	242	PF00076.20	RRM_1	2	1	65	65	44.2	1.1e-11	1
AT1G32790.2 | Symbols: CID11 | CTC-interacting domain 11 | chr1:11875028-11877188 REVERSE LENGTH=406	272	339	272	340	PF00076.20	RRM_1		1	69	70	30.4	2.3e-07	1
AT1G33140.1 | Symbols: PGY2 | Ribosomal protein L6 family | chr1:12023360-12024502 FORWARD LENGTH=194	12	90	12	90	PF00347.21	Ribosomal_L6	2	1	76	81	33.7	4e-08	1
AT1G33140.1 | Symbols: PGY2 | Ribosomal protein L6 family | chr1:12023360-12024502 FORWARD LENGTH=194	102	181	102	181	PF00347.21	Ribosomal_L6		1	76	82	53.4	2.9e-14	1
AT1G33590.1 | Symbols: | Leucine-rich repeat (LRR) family protein | chr1:12177788-12179221 FORWARD LENGTH=477	29	67	28	68	PF08263.10	LRRNT_2	1	2	40	40	53.7	1.7e-14	1
AT1G33590.1 | Symbols: | Leucine-rich repeat (LRR) family protein | chr1:12177788-12179221 FORWARD LENGTH=477	176	233	174	234	PF13855.4	LRR_8	2	3	60	58	30.9	1.5e-07	1
AT1G33590.1 | Symbols: | Leucine-rich repeat (LRR) family protein | chr1:12177788-12179221 FORWARD LENGTH=477	249	307	247	307	PF13855.4	LRR_8		3	61	59	38	9.6e-10	1
AT1G33790.2 | Symbols: | jacalin lectin family protein | chr1:12256990-12260432 FORWARD LENGTH=745	13	148	13	148	PF01419.15	Jacalin	5	1	135	142	131.9	1.3e-38	1
AT1G33790.2 | Symbols: | jacalin lectin family protein | chr1:12256990-12260432 FORWARD LENGTH=745	163	294	162	294	PF01419.15	Jacalin		2	135	135	132.7	7.4e-39	1
AT1G33790.2 | Symbols: | jacalin lectin family protein | chr1:12256990-12260432 FORWARD LENGTH=745	318	447	318	448	PF01419.15	Jacalin		1	134	136	145.2	9.7e-43	1
AT1G33790.2 | Symbols: | jacalin lectin family protein | chr1:12256990-12260432 FORWARD LENGTH=745	463	593	462	594	PF01419.15	Jacalin		2	134	134	128.9	1e-37	1
AT1G33790.2 | Symbols: | jacalin lectin family protein | chr1:12256990-12260432 FORWARD LENGTH=745	612	744	612	744	PF01419.15	Jacalin		1	135	135	160.7	1.6e-47	1
AT1G33980.2 | Symbols: ATUPF3, UPF3 | Smg-4/UPF3 family protein | chr1:12351719-12354401 FORWARD LENGTH=484	6	170	5	170	PF03467.13	Smg4_UPF3	1	2	173	172	168.9	9.1e-50	1
AT1G34360.1 | Symbols: | translation initiation factor 3 (IF-3) family protein | chr1:12542986-12546025 FORWARD LENGTH=520	86	152	86	153	PF05198.14	IF3_N	1	1	69	69	69.9	1.5e-19	1
AT1G35580.1 | Symbols: CINV1 | cytosolic invertase 1 | chr1:13122460-13124808 REVERSE LENGTH=551	88	524	88	524	PF12899.5	Glyco_hydro_100	1	1	435	437	704.2	4.7e-212	1
AT1G41830.1 | Symbols: SKS6 | SKU5-similar 6 | chr1:15603892-15607802 REVERSE LENGTH=542	35	148	34	150	PF07732.13	Cu-oxidase_3	1	2	117	116	118.7	1.2e-34	1
AT1G41830.1 | Symbols: SKS6 | SKU5-similar 6 | chr1:15603892-15607802 REVERSE LENGTH=542	161	296	160	297	PF00394.20	Cu-oxidase	1	2	158	157	142.5	1.1e-41	1
AT1G41830.1 | Symbols: SKS6 | SKU5-similar 6 | chr1:15603892-15607802 REVERSE LENGTH=542	385	513	377	517	PF07731.12	Cu-oxidase_2	1	9	133	131	95.8	1.5e-27	1
AT1G42440.1 | Symbols: | FUNCTIONS IN: molecular_function unknown; INVOLVED IN: ribosome biogenesis; LOCATED IN: nucleus; EXPRESSED IN: 22 plant structures; EXPRESSED DURING: 13 growth stages; CONTAINS InterPro DOMAIN/s: AARP2CN (InterPro:IPR012948), Protein of unknown function DUF663 (InterPro:IPR007034); BEST Arabidopsis thaliana protein match is: P-loop containing nucleoside triphosphate hydro…	228	308	228	308	PF08142.10	AARP2CN	1	1	86	86	69.9	1.3e-19	1
AT1G42440.1 | Symbols: | FUNCTIONS IN: molecular_function unknown; INVOLVED IN: ribosome biogenesis; LOCATED IN: nucleus; EXPRESSED IN: 22 plant structures; EXPRESSED DURING: 13 growth stages; CONTAINS InterPro DOMAIN/s: AARP2CN (InterPro:IPR012948), Protein of unknown function DUF663 (InterPro:IPR007034); BEST Arabidopsis thaliana protein match is: P-loop containing nucleoside triphosphate hydro…	485	782	485	782	PF04950.10	RIBIOP_C	1	1	292	301	374.3	4.1e-112	1
AT1G24360.1 | Symbols: | NAD(P)-binding Rossmann-fold superfamily protein | chr1:8640820-8643283 FORWARD LENGTH=319	83	317	83	318	PF13561.4	adh_short_C2	1	1	233	239	217.5	1.7e-64	1
AT1G43800.1 | Symbols: | Plant stearoyl-acyl-carrier-protein desaturase family protein | chr1:16577662-16579549 FORWARD LENGTH=391	58	385	58	385	PF03405.12	FA_desaturase_2	1	1	326	328	512.5	3.1e-154	1
AT1G43910.1 | Symbols: | P-loop containing nucleoside triphosphate hydrolases superfamily protein | chr1:16656050-16657628 REVERSE LENGTH=475	36	133	36	134	PF14363.4	AAA_assoc	1	1	95	98	47	2.2e-12	1
AT1G43910.1 | Symbols: | P-loop containing nucleoside triphosphate hydrolases superfamily protein | chr1:16656050-16657628 REVERSE LENGTH=475	243	384	242	386	PF00004.27	AAA	1	2	130	151	64.8	9e-18	1
AT1G45145.1 | Symbols: ATTRX5, ATH5, LIV1, TRX5 | thioredoxin H-type 5 | chr1:17075264-17076256 REVERSE LENGTH=118	9	110	7	111	PF00085.18	Thioredoxin	1	3	103	104	101.2	2.4e-29	1
AT1G24180.1 | Symbols: IAR4 | Thiamin diphosphate-binding fold (THDP-binding) superfamily protein | chr1:8560777-8563382 REVERSE LENGTH=393	69	364	68	365	PF00676.18	E1_dh	1	2	299	302	393.8	3.4e-118	1
AT1G49600.1 | Symbols: ATRBP47A, RBP47A | RNA-binding protein 47A | chr1:18357236-18360150 REVERSE LENGTH=445	121	187	121	190	PF00076.20	RRM_1	3	1	66	67	41.9	6e-11	1
AT1G49600.1 | Symbols: ATRBP47A, RBP47A | RNA-binding protein 47A | chr1:18357236-18360150 REVERSE LENGTH=445	215	285	215	286	PF00076.20	RRM_1		1	69	71	56	2.3e-15	1
AT1G49600.1 | Symbols: ATRBP47A, RBP47A | RNA-binding protein 47A | chr1:18357236-18360150 REVERSE LENGTH=445	329	393	329	393	PF00076.20	RRM_1		1	70	70	65.2	3.1e-18	1
AT1G49760.1 | Symbols: PAB8, PABP8 | poly(A) binding protein 8 | chr1:18416740-18419753 FORWARD LENGTH=671	47	117	47	117	PF00076.20	RRM_1	5	1	70	71	62.4	2.3e-17	1
AT1G49760.1 | Symbols: PAB8, PABP8 | poly(A) binding protein 8 | chr1:18416740-18419753 FORWARD LENGTH=671	135	203	135	204	PF00076.20	RRM_1		1	69	69	71.2	4.4e-20	1
AT1G49760.1 | Symbols: PAB8, PABP8 | poly(A) binding protein 8 | chr1:18416740-18419753 FORWARD LENGTH=671	226	294	226	294	PF00076.20	RRM_1		1	69	69	80.3	6.2e-23	1
AT1G49760.1 | Symbols: PAB8, PABP8 | poly(A) binding protein 8 | chr1:18416740-18419753 FORWARD LENGTH=671	329	396	329	398	PF00076.20	RRM_1		1	68	68	74.2	5e-21	1
AT1G49760.1 | Symbols: PAB8, PABP8 | poly(A) binding protein 8 | chr1:18416740-18419753 FORWARD LENGTH=671	580	645	578	645	PF00658.16	PABP	1	3	68	66	94.8	2.4e-27	1
AT1G49240.1 | Symbols: ACT8 | actin 8 | chr1:18216539-18217947 FORWARD LENGTH=377	5	377	4	377	PF00022.17	Actin	1	2	407	413	485.4	9.4e-146	1
AT1G50920.1 | Symbols: | Nucleolar GTP-binding protein | chr1:18870555-18872570 FORWARD LENGTH=671	236	292	235	292	PF06858.12	NOG1	1	2	58	57	84.9	2.1e-24	1
AT1G50920.1 | Symbols: | Nucleolar GTP-binding protein | chr1:18870555-18872570 FORWARD LENGTH=671	405	458	405	458	PF08155.9	NOGCT	1	1	54	54	96.4	6.2e-28	1
AT1G51580.1 | Symbols: | RNA-binding KH domain-containing protein | chr1:19125612-19128102 FORWARD LENGTH=621	22	71	20	82	PF00013.27	KH_1	5	3	52	51	41.2	9.9e-11	1
AT1G51580.1 | Symbols: | RNA-binding KH domain-containing protein | chr1:19125612-19128102 FORWARD LENGTH=621	151	216	149	218	PF00013.27	KH_1		3	64	66	31.6	9.5e-08	1
AT1G51580.1 | Symbols: | RNA-binding KH domain-containing protein | chr1:19125612-19128102 FORWARD LENGTH=621	279	327	277	335	PF00013.27	KH_1		3	52	50	47.2	1.3e-12	1
AT1G51580.1 | Symbols: | RNA-binding KH domain-containing protein | chr1:19125612-19128102 FORWARD LENGTH=621	362	428	361	430	PF00013.27	KH_1		2	64	67	42.2	4.9e-11	1
AT1G51580.1 | Symbols: | RNA-binding KH domain-containing protein | chr1:19125612-19128102 FORWARD LENGTH=621	551	613	550	614	PF00013.27	KH_1		2	65	64	32.1	6.6e-08	1
AT1G51980.1 | Symbols: | Insulinase (Peptidase family M16) protein | chr1:19323692-19326771 REVERSE LENGTH=503	89	233	88	234	PF00675.18	Peptidase_M16	1	2	148	147	132.3	1.2e-38	1
AT1G51980.1 | Symbols: | Insulinase (Peptidase family M16) protein | chr1:19323692-19326771 REVERSE LENGTH=503	240	422	239	423	PF05193.19	Peptidase_M16_C	1	2	182	192	122.7	1.5e-35	1
AT1G52300.1 | Symbols: | Zinc-binding ribosomal protein family protein | chr1:19475213-19476152 REVERSE LENGTH=95	2	53	2	54	PF01907.17	Ribosomal_L37e	1	1	53	53	90.5	4.9e-26	1
AT1G52380.1 | Symbols: | NUP50 (Nucleoporin 50 kDa) protein | chr1:19509979-19511301 FORWARD LENGTH=440	13	77	12	79	PF08911.9	NUP50	1	2	66	68	60.5	1.6e-16	1
AT1G52380.1 | Symbols: | NUP50 (Nucleoporin 50 kDa) protein | chr1:19509979-19511301 FORWARD LENGTH=440	298	412	295	414	PF00638.16	Ran_BP1	1	3	120	119	64.7	8.1e-18	1
AT1G50030.1 | Symbols: TOR | target of rapamycin | chr1:18522626-18539619 REVERSE LENGTH=2481	776	944	776	944	PF11865.6	DUF3385	1	1	161	170	166.2	4.7e-49	1
AT1G50030.1 | Symbols: TOR | target of rapamycin | chr1:18522626-18539619 REVERSE LENGTH=2481	1449	1813	1449	1813	PF02259.21	FAT	1	1	345	379	356.1	1.9e-106	1
AT1G50030.1 | Symbols: TOR | target of rapamycin | chr1:18522626-18539619 REVERSE LENGTH=2481	1920	2022	1920	2022	PF08771.9	FRB_dom	1	1	99	103	136.7	2.6e-40	1
AT1G50030.1 | Symbols: TOR | target of rapamycin | chr1:18522626-18539619 REVERSE LENGTH=2481	2091	2339	2090	2340	PF00454.25	PI3_PI4_kinase	1	2	249	250	248.7	6.8e-74	1
AT1G50030.1 | Symbols: TOR | target of rapamycin | chr1:18522626-18539619 REVERSE LENGTH=2481	2451	2481	2450	2481	PF02260.18	FATC	1	2	32	31	55.5	3.3e-15	1
AT1G52760.1 | Symbols: LysoPL2 | lysophospholipase 2 | chr1:19651378-19652576 FORWARD LENGTH=332	62	305	61	306	PF12146.6	Hydrolase_4	1	2	238	244	178.8	9.1e-53	1
AT1G52600.1 | Symbols: | Peptidase S24/S26A/S26B/S26C family protein | chr1:19590612-19592486 FORWARD LENGTH=180	53	104	52	126	PF00717.21	Peptidase_S24	1	2	52	52	43.2	2.5e-11	1
AT1G52400.1 | Symbols: BGL1, BGLU18, ATBG1 | beta glucosidase 18 | chr1:19515250-19517930 FORWARD LENGTH=528	43	516	40	519	PF00232.16	Glyco_hydro_1	1	4	449	478	493.7	3.4e-148	1
AT1G53280.1 | Symbols: | Class I glutamine amidotransferase-like superfamily protein | chr1:19864942-19867341 REVERSE LENGTH=438	53	218	53	218	PF01965.22	DJ-1_PfpI	2	1	165	167	139	1.1e-40	1
AT1G53280.1 | Symbols: | Class I glutamine amidotransferase-like superfamily protein | chr1:19864942-19867341 REVERSE LENGTH=438	259	421	258	422	PF01965.22	DJ-1_PfpI		2	164	165	146	7.5e-43	1
AT1G22410.1 | Symbols: | Class-II DAHP synthetase family protein | chr1:7912120-7914742 FORWARD LENGTH=527	75	511	75	511	PF01474.14	DAHP_synth_2	1	1	437	438	645.7	2.5e-194	1
AT1G53750.1 | Symbols: RPT1A | regulatory particle triple-A 1A | chr1:20065921-20068324 REVERSE LENGTH=426	205	337	205	338	PF00004.27	AAA	1	1	131	135	134.8	2.2e-39	1
AT1G54490.1 | Symbols: AIN1, EIN5, XRN4, ATXRN4 | exoribonuclease 4 | chr1:20350300-20356650 FORWARD LENGTH=947	1	254	1	255	PF03159.16	XRN_N	1	1	236	257	325.3	1.8e-97	1
AT1G54490.1 | Symbols: AIN1, EIN5, XRN4, ATXRN4 | exoribonuclease 4 | chr1:20350300-20356650 FORWARD LENGTH=947	264	279	263	279	PF00098.21	zf-CCHC	1	2	17	16	27.7	1.7e-06	1
AT1G55040.1 | Symbols: | zinc finger (Ran-binding) family protein | chr1:20534895-20538901 FORWARD LENGTH=849	371	399	371	400	PF00641.16	zf-RanBP	2	1	29	29	35.9	3e-09	1
AT1G55040.1 | Symbols: | zinc finger (Ran-binding) family protein | chr1:20534895-20538901 FORWARD LENGTH=849	405	432	404	433	PF00641.16	zf-RanBP		2	29	28	20.4	0.00021	1
AT1G55150.1 | Symbols: | DEA(D/H)-box RNA helicase family protein | chr1:20574634-20577141 FORWARD LENGTH=501	123	294	123	294	PF00270.27	DEAD	1	1	176	179	165.4	9.3e-49	1
AT1G55150.1 | Symbols: | DEA(D/H)-box RNA helicase family protein | chr1:20574634-20577141 FORWARD LENGTH=501	330	439	329	439	PF00271.29	Helicase_C	1	2	111	111	103.1	9.2e-30	1
AT1G55310.3 | Symbols: SR33, SCL33, At-SCL33 | SC35-like splicing factor 33 | chr1:20630676-20632695 FORWARD LENGTH=300	38	119	38	120	PF00076.20	RRM_1	1	1	69	82	55.4	3.6e-15	1
AT1G55820.1 | Symbols: | Kinase-related protein of unknown function (DUF1296) | chr1:20864397-20867418 FORWARD LENGTH=575	13	73	13	73	PF06972.9	DUF1296	1	1	60	61	91.7	2.1e-26	1
AT1G55850.1 | Symbols: ATCSLE1, CSLE1 | cellulose synthase like E1 | chr1:20876752-20879414 FORWARD LENGTH=729	111	403	111	413	PF03552.12	Cellulose_synt	2	1	302	305	295.4	9.2e-88	1
AT1G55850.1 | Symbols: ATCSLE1, CSLE1 | cellulose synthase like E1 | chr1:20876752-20879414 FORWARD LENGTH=729	418	720	403	728	PF03552.12	Cellulose_synt		400	698	305	171.1	3.5e-50	1
AT1G56410.1 | Symbols: ERD2, HSP70T-1 | heat shock protein 70 (Hsp 70) family protein | chr1:21117147-21119241 FORWARD LENGTH=617	9	616	9	616	PF00012.18	HSP70	1	1	599	612	848.6	1.9e-255	1
AT1G56450.1 | Symbols: PBG1 | 20S proteasome beta subunit G1 | chr1:21141970-21144186 FORWARD LENGTH=246	30	213	28	213	PF00227.24	Proteasome	1	3	190	189	118.3	2.5e-34	1
AT1G58470.1 | Symbols: ATRBP1, RBP1 | RNA-binding protein 1 | chr1:21727374-21728539 FORWARD LENGTH=360	8	68	8	76	PF00076.20	RRM_1	2	1	62	63	54.3	7.8e-15	1
AT1G58470.1 | Symbols: ATRBP1, RBP1 | RNA-binding protein 1 | chr1:21727374-21728539 FORWARD LENGTH=360	122	188	122	191	PF00076.20	RRM_1		1	67	68	57.4	8.5e-16	1
AT1G59870.1 | Symbols: PEN3, PDR8, ATPDR8, ABCG36, ATABCG36 | ABC-2 and Plant PDR ABC-type transporter family protein | chr1:22034661-22039844 FORWARD LENGTH=1469	49	162	16	162	PF14510.4	ABC_trans_N	1	19	80	114	46.4	3.9e-12	1
AT1G59870.1 | Symbols: PEN3, PDR8, ATPDR8, ABCG36, ATABCG36 | ABC-2 and Plant PDR ABC-type transporter family protein | chr1:22034661-22039844 FORWARD LENGTH=1469	187	369	187	371	PF00005.25	ABC_tran	2	1	135	189	51.6	1.2e-13	1
AT1G59870.1 | Symbols: PEN3, PDR8, ATPDR8, ABCG36, ATABCG36 | ABC-2 and Plant PDR ABC-type transporter family protein | chr1:22034661-22039844 FORWARD LENGTH=1469	523	734	522	735	PF01061.22	ABC2_membrane	2	2	209	214	149.9	5.9e-44	1
AT1G59870.1 | Symbols: PEN3, PDR8, ATPDR8, ABCG36, ATABCG36 | ABC-2 and Plant PDR ABC-type transporter family protein | chr1:22034661-22039844 FORWARD LENGTH=1469	740	801	740	804	PF08370.9	PDR_assoc	1	1	61	62	82.7	1e-23	1
AT1G59870.1 | Symbols: PEN3, PDR8, ATPDR8, ABCG36, ATABCG36 | ABC-2 and Plant PDR ABC-type transporter family protein | chr1:22034661-22039844 FORWARD LENGTH=1469	895	1047	895	1047	PF00005.25	ABC_tran		1	137	159	69.2	4.4e-19	1
AT1G59870.1 | Symbols: PEN3, PDR8, ATPDR8, ABCG36, ATABCG36 | ABC-2 and Plant PDR ABC-type transporter family protein | chr1:22034661-22039844 FORWARD LENGTH=1469	1193	1406	1192	1406	PF01061.22	ABC2_membrane		2	210	215	196.4	3.3e-58	1
AT1G60650.1 | Symbols: | RNA-binding (RRM/RBD/RNP motifs) family protein with retrovirus zinc finger-like domain | chr1:22340089-22342148 FORWARD LENGTH=292	14	83	14	84	PF00076.20	RRM_1	1	1	69	70	76.3	1e-21	1
AT1G60650.1 | Symbols: | RNA-binding (RRM/RBD/RNP motifs) family protein with retrovirus zinc finger-like domain | chr1:22340089-22342148 FORWARD LENGTH=292	116	132	115	132	PF00098.21	zf-CCHC	1	2	18	17	31	1.5e-07	1
AT1G62380.1 | Symbols: ACO2, ATACO2 | ACC oxidase 2 | chr1:23082340-23084068 FORWARD LENGTH=320	8	98	7	114	PF14226.4	DIOX_N	1	2	98	97	56	5.6e-15	1
AT1G62380.1 | Symbols: ACO2, ATACO2 | ACC oxidase 2 | chr1:23082340-23084068 FORWARD LENGTH=320	162	256	141	256	PF03171.18	2OG-FeII_Oxy	1	6	101	97	97.5	4.6e-28	1
AT1G58230.1 | Symbols: | binding | chr1:21566331-21578865 FORWARD LENGTH=2604	456	626	453	626	PF13385.4	Laminin_G_3	1	4	152	174	32.7	6.9e-08	1
AT1G58230.1 | Symbols: | binding | chr1:21566331-21578865 FORWARD LENGTH=2604	698	970	697	971	PF15787.3	DUF4704	1	2	278	285	271.4	7.1e-81	1
AT1G58230.1 | Symbols: | binding | chr1:21566331-21578865 FORWARD LENGTH=2604	1569	1662	1554	1666	PF16057.3	DUF4800	1	153	243	94	36.8	2.3e-09	1
AT1G58230.1 | Symbols: | binding | chr1:21566331-21578865 FORWARD LENGTH=2604	1772	1909	1772	1912	PF14844.4	PH_BEACH	1	1	97	138	45.5	5.5e-12	1
AT1G58230.1 | Symbols: | binding | chr1:21566331-21578865 FORWARD LENGTH=2604	1950	2226	1949	2226	PF02138.16	Beach	1	2	276	277	404.6	1.8e-121	1
AT1G58230.1 | Symbols: | binding | chr1:21566331-21578865 FORWARD LENGTH=2604	2362	2398	2360	2398	PF00400.30	WD40	2	3	38	37	25.8	1.3e-05	1
AT1G58230.1 | Symbols: | binding | chr1:21566331-21578865 FORWARD LENGTH=2604	2427	2460	2426	2462	PF00400.30	WD40		3	35	34	17.7	0.0045	1
AT1G62740.1 | Symbols: Hop2 | stress-inducible protein, putative | chr1:23231026-23233380 FORWARD LENGTH=571	71	103	70	103	PF00515.26	TPR_1	2	2	34	33	34.3	1.1e-08	1
AT1G62740.1 | Symbols: Hop2 | stress-inducible protein, putative | chr1:23231026-23233380 FORWARD LENGTH=571	389	430	389	430	PF13414.4	TPR_11	1	1	42	42	34.8	8.6e-09	1
AT1G62740.1 | Symbols: Hop2 | stress-inducible protein, putative | chr1:23231026-23233380 FORWARD LENGTH=571	451	483	450	483	PF00515.26	TPR_1		2	34	33	29.3	4.3e-07	1
AT1G67430.1 | Symbols: | Ribosomal protein L22p/L17e family protein | chr1:25262209-25263627 FORWARD LENGTH=175	20	152	19	152	PF00237.17	Ribosomal_L22	1	2	102	134	124.6	1.7e-36	1
AT1G67680.1 | Symbols: | SRP72 RNA-binding domain | chr1:25365962-25368464 REVERSE LENGTH=664	35	165	32	171	PF17004.3	SRP_TPR_like	1	4	113	132	48	9.6e-13	1
AT1G67680.1 | Symbols: | SRP72 RNA-binding domain | chr1:25365962-25368464 REVERSE LENGTH=664	557	609	550	609	PF08492.10	SRP72	1	9	58	53	61.3	7.8e-17	1
AT1G69250.1 | Symbols: | Nuclear transport factor 2 (NTF2) family protein with RNA binding (RRM-RBD-RNP motifs) domain | chr1:26033163-26035301 FORWARD LENGTH=427	13	128	13	128	PF02136.18	NTF2	1	1	120	124	100.9	6e-29	1
AT1G69250.1 | Symbols: | Nuclear transport factor 2 (NTF2) family protein with RNA binding (RRM-RBD-RNP motifs) domain | chr1:26033163-26035301 FORWARD LENGTH=427	282	348	282	356	PF00076.20	RRM_1	1	1	64	67	36	4.1e-09	1
AT1G69530.3 | Symbols: ATEXPA1, EXP1, AT-EXP1, ATEXP1, ATHEXP ALPHA 1.2, EXPA1 | expansin A1 | chr1:26142034-26143200 FORWARD LENGTH=275	62	147	62	147	PF03330.16	DPBB_1	1	1	83	96	82.8	1.4e-23	1
AT1G69530.3 | Symbols: ATEXPA1, EXP1, AT-EXP1, ATEXP1, ATHEXP ALPHA 1.2, EXPA1 | expansin A1 | chr1:26142034-26143200 FORWARD LENGTH=275	158	234	158	235	PF01357.19	Pollen_allerg_1	1	1	79	79	97.5	3.1e-28	1
AT1G65820.3 | Symbols: | microsomal glutathione s-transferase, putative | chr1:24485213-24486682 FORWARD LENGTH=194	16	136	15	139	PF01124.16	MAPEG	1	2	127	127	72.8	2.1e-20	1
AT1G70770.1 | Symbols: | Protein of unknown function DUF2359, transmembrane | chr1:26688622-26691185 REVERSE LENGTH=610	275	566	268	582	PF10151.7	TMEM214	1	214	483	296	44.4	7.4e-12	1
AT1G71770.1 | Symbols: PAB5 | poly(A)-binding protein 5 | chr1:26990777-26993489 REVERSE LENGTH=682	61	130	61	130	PF00076.20	RRM_1	4	1	70	70	63.6	1e-17	1
AT1G71770.1 | Symbols: PAB5 | poly(A)-binding protein 5 | chr1:26990777-26993489 REVERSE LENGTH=682	148	215	148	216	PF00076.20	RRM_1		1	68	68	71	5e-20	1
AT1G71770.1 | Symbols: PAB5 | poly(A)-binding protein 5 | chr1:26990777-26993489 REVERSE LENGTH=682	241	307	241	310	PF00076.20	RRM_1		1	67	67	74.7	3.4e-21	1
AT1G71770.1 | Symbols: PAB5 | poly(A)-binding protein 5 | chr1:26990777-26993489 REVERSE LENGTH=682	344	412	344	413	PF00076.20	RRM_1		1	69	69	68.5	3e-19	1
AT1G71770.1 | Symbols: PAB5 | poly(A)-binding protein 5 | chr1:26990777-26993489 REVERSE LENGTH=682	594	660	593	660	PF00658.16	PABP	1	2	68	67	84.6	3.8e-24	1
AT1G74020.1 | Symbols: SS2 | strictosidine synthase 2 | chr1:27835289-27837277 REVERSE LENGTH=335	146	234	146	234	PF03088.14	Str_synth	1	1	89	89	121.8	8.6e-36	1
AT1G74100.1 | Symbols: SOT16, ATSOT16, CORI-7, ATST5A | sulfotransferase 16 | chr1:27864489-27865505 REVERSE LENGTH=338	71	332	71	332	PF00685.25	Sulfotransfer_1	1	1	267	280	211.4	1.5e-62	1
AT1G72330.3 | Symbols: ALAAT2 | alanine aminotransferase 2 | chr1:27233637-27236571 FORWARD LENGTH=553	229	526	164	540	PF00155.19	Aminotran_1_2	1	86	348	305	117.8	5.3e-34	1
AT1G54010.1 | Symbols: | GDSL-like Lipase/Acylhydrolase superfamily protein | chr1:20158854-20160747 REVERSE LENGTH=386	37	338	37	338	PF00657.20	Lipase_GDSL	1	1	200	321	91.8	5e-26	1
AT1G72550.1 | Symbols: | tRNA synthetase beta subunit family protein | chr1:27319947-27323908 REVERSE LENGTH=598	119	279	118	280	PF03483.15	B3_4	1	2	173	203	87	1e-24	1
AT1G72550.1 | Symbols: | tRNA synthetase beta subunit family protein | chr1:27319947-27323908 REVERSE LENGTH=598	309	378	308	378	PF03484.13	B5	1	2	67	70	52.3	4.9e-14	1
AT1G54100.1 | Symbols: ALDH7B4 | aldehyde dehydrogenase 7B4 | chr1:20195435-20198853 REVERSE LENGTH=508	36	489	29	491	PF00171.20	Aldedh	1	9	460	459	441.4	2.8e-132	1
AT1G75270.1 | Symbols: DHAR2 | dehydroascorbate reductase 2 | chr1:28250255-28251237 REVERSE LENGTH=213	19	87	17	88	PF13417.4	GST_N_3	1	6	74	69	71.5	5.3e-20	1
AT1G75270.1 | Symbols: DHAR2 | dehydroascorbate reductase 2 | chr1:28250255-28251237 REVERSE LENGTH=213	116	186	113	186	PF13410.4	GST_C_2	1	4	70	71	35.7	5.7e-09	1
AT1G75340.1 | Symbols: | Zinc finger C-x8-C-x5-C-x3-H type family protein | chr1:28269153-28271873 REVERSE LENGTH=435	3	26	1	26	PF00642.22	zf-CCCH	1	3	27	25	36.2	3.5e-09	1
AT1G76160.1 | Symbols: sks5 | SKU5 similar 5 | chr1:28578211-28581020 REVERSE LENGTH=541	34	147	33	149	PF07732.13	Cu-oxidase_3	1	2	117	116	119.1	9e-35	1
AT1G76160.1 | Symbols: sks5 | SKU5 similar 5 | chr1:28578211-28581020 REVERSE LENGTH=541	160	295	159	296	PF00394.20	Cu-oxidase	1	2	158	157	149.9	5.8e-44	1
AT1G76160.1 | Symbols: sks5 | SKU5 similar 5 | chr1:28578211-28581020 REVERSE LENGTH=541	377	513	376	516	PF07731.12	Cu-oxidase_2	1	2	134	138	100.9	4.1e-29	1
AT1G76860.1 | Symbols: | Small nuclear ribonucleoprotein family protein | chr1:28854594-28855637 REVERSE LENGTH=98	16	92	14	92	PF01423.20	LSM	1	3	67	77	71.6	2.9e-20	1
AT1G77030.1 | Symbols: | hydrolases, acting on acid anhydrides, in phosphorus-containing anhydrides;ATP-dependent helicases;nucleic acid binding;ATP binding;RNA binding;helicases | chr1:28947887-28951526 REVERSE LENGTH=845	52	218	52	221	PF00270.27	DEAD	1	1	173	174	170.4	2.8e-50	1
AT1G77030.1 | Symbols: | hydrolases, acting on acid anhydrides, in phosphorus-containing anhydrides;ATP-dependent helicases;nucleic acid binding;ATP binding;RNA binding;helicases | chr1:28947887-28951526 REVERSE LENGTH=845	256	366	255	366	PF00271.29	Helicase_C	1	2	111	111	82.5	2.4e-23	1
AT1G77030.1 | Symbols: | hydrolases, acting on acid anhydrides, in phosphorus-containing anhydrides;ATP-dependent helicases;nucleic acid binding;ATP binding;RNA binding;helicases | chr1:28947887-28951526 REVERSE LENGTH=845	638	699	638	718	PF08147.10	DBP10CT	1	1	64	65	50.5	1.6e-13	1
AT1G77510.1 | Symbols: ATPDIL1-2, PDI6, ATPDI6, PDIL1-2 | PDI-like 1-2 | chr1:29126742-29129433 FORWARD LENGTH=508	31	137	30	138	PF00085.18	Thioredoxin	2	2	103	108	99.8	6.6e-29	1
AT1G77510.1 | Symbols: ATPDIL1-2, PDI6, ATPDI6, PDIL1-2 | PDI-like 1-2 | chr1:29126742-29129433 FORWARD LENGTH=508	167	349	167	351	PF13848.4	Thioredoxin_6	1	1	182	189	70.2	2e-19	1
AT1G77510.1 | Symbols: ATPDIL1-2, PDI6, ATPDI6, PDIL1-2 | PDI-like 1-2 | chr1:29126742-29129433 FORWARD LENGTH=508	374	477	373	478	PF00085.18	Thioredoxin		2	103	104	86.7	7.8e-25	1
AT1G78570.1 | Symbols: RHM1, ROL1, ATRHM1 | rhamnose biosynthesis 1 | chr1:29550110-29552207 FORWARD LENGTH=669	10	315	10	315	PF16363.3	GDP_Man_Dehyd	1	1	332	335	238	1.6e-70	1
AT1G78570.1 | Symbols: RHM1, ROL1, ATRHM1 | rhamnose biosynthesis 1 | chr1:29550110-29552207 FORWARD LENGTH=669	386	558	385	650	PF04321.15	RmlD_sub_bind	1	2	165	177	49.1	3.6e-13	1
AT1G75910.1 | Symbols: EXL4 | extracellular lipase 4 | chr1:28501511-28503096 FORWARD LENGTH=343	30	333	29	334	PF00657.20	Lipase_GDSL	1	2	199	328	56.6	3e-15	1
AT1G78900.1 | Symbols: VHA-A | vacuolar ATP synthase subunit A | chr1:29660463-29664575 FORWARD LENGTH=623	26	85	24	86	PF02874.21	ATP-synt_ab_N	1	3	68	66	51.5	1e-13	1
AT1G78900.1 | Symbols: VHA-A | vacuolar ATP synthase subunit A | chr1:29660463-29664575 FORWARD LENGTH=623	102	223	102	223	PF16886.3	ATP-synt_ab_Xtn	1	1	120	122	138.4	9.2e-41	1
AT1G78900.1 | Symbols: VHA-A | vacuolar ATP synthase subunit A | chr1:29660463-29664575 FORWARD LENGTH=623	232	458	232	458	PF00006.23	ATP-synt_ab	1	1	213	228	358	1.5e-107	1
AT1G75330.1 | Symbols: OTC | ornithine carbamoyltransferase | chr1:28266457-28268383 REVERSE LENGTH=375	73	214	73	214	PF02729.19	OTCace_N	1	1	146	149	153.1	4.3e-45	1
AT1G75330.1 | Symbols: OTC | ornithine carbamoyltransferase | chr1:28266457-28268383 REVERSE LENGTH=375	220	371	220	372	PF00185.22	OTCace	1	1	156	157	185.7	5.2e-55	1
AT1G74230.1 | Symbols: GR-RBP5 | glycine-rich RNA-binding protein 5 | chr1:27915346-27916857 FORWARD LENGTH=289	36	105	36	105	PF00076.20	RRM_1	1	1	70	71	75.7	1.7e-21	1
AT1G23820.1 | Symbols: SPDS1 | spermidine synthase 1 | chr1:8420278-8422724 FORWARD LENGTH=378	90	334	90	335	PF01564.15	Spermine_synth	1	1	246	247	323.2	6.4e-97	1
AT1G22300.1 | Symbols: GRF10, 14-3-3EPSILON, GF14 EPSILON | general regulatory factor 10 | chr1:7879146-7881103 REVERSE LENGTH=254	11	233	11	233	PF00244.18	14-3-3	1	1	222	223	347.6	2.2e-104	1
AT1G22400.1 | Symbols: UGT85A1, ATUGT85A1 | UDP-Glycosyltransferase superfamily protein | chr1:7903851-7906607 REVERSE LENGTH=489	104	446	17	458	PF00201.16	UDPGT	1	83	412	351	104.9	4e-30	1
AT1G79280.2 | Symbols: NUA | nuclear pore anchor | chr1:29819176-29832809 REVERSE LENGTH=2115	1067	1193	1066	1194	PF07926.10	TPR_MLP1_2	1	2	128	127	83.5	1.2e-23	1
AT2G15440.1 | Symbols: | Protein of unknown function (DUF579) | chr2:6743792-6744781 REVERSE LENGTH=329	99	287	98	287	PF04669.11	Polysacc_synt_4	1	2	190	189	243.2	1.3e-72	1
AT2G13540.1 | Symbols: ENS, ABH1, CBP80, ATCBP80 | ARM repeat superfamily protein | chr2:5637053-5642813 FORWARD LENGTH=848	20	221	15	228	PF02854.17	MIF4G	1	12	206	214	114	6.7e-33	1
AT2G13540.1 | Symbols: ENS, ABH1, CBP80, ATCBP80 | ARM repeat superfamily protein | chr2:5637053-5642813 FORWARD LENGTH=848	311	466	291	468	PF09088.9	MIF4G_like	1	34	189	156	129.9	8.4e-38	1
AT2G13540.1 | Symbols: ENS, ABH1, CBP80, ATCBP80 | ARM repeat superfamily protein | chr2:5637053-5642813 FORWARD LENGTH=848	494	794	484	814	PF09090.9	MIF4G_like_2	1	7	243	320	123.2	1.1e-35	1
AT2G15620.1 | Symbols: NIR1, NIR, ATHNIR | nitrite reductase 1 | chr2:6810552-6812666 FORWARD LENGTH=586	123	188	120	189	PF03460.15	NIR_SIR_ferr	2	3	68	67	62.3	2.6e-17	1
AT2G15620.1 | Symbols: NIR1, NIR, ATHNIR | nitrite reductase 1 | chr2:6810552-6812666 FORWARD LENGTH=586	198	354	197	357	PF01077.20	NIR_SIR	2	2	156	159	132.4	9.1e-39	1
AT2G15620.1 | Symbols: NIR1, NIR, ATHNIR | nitrite reductase 1 | chr2:6810552-6812666 FORWARD LENGTH=586	381	443	380	444	PF03460.15	NIR_SIR_ferr		2	65	64	68.9	2.2e-19	1
AT2G15620.1 | Symbols: NIR1, NIR, ATHNIR | nitrite reductase 1 | chr2:6810552-6812666 FORWARD LENGTH=586	462	570	458	576	PF01077.20	NIR_SIR		9	118	114	42.6	3.8e-11	1
AT2G15690.1 | Symbols: | Tetratricopeptide repeat (TPR)-like superfamily protein | chr2:6831855-6833594 REVERSE LENGTH=579	304	348	300	349	PF13041.4	PPR_2	1	5	49	45	34.3	1.9e-08	1
AT2G15690.1 | Symbols: | Tetratricopeptide repeat (TPR)-like superfamily protein | chr2:6831855-6833594 REVERSE LENGTH=579	484	569	464	569	PF14432.4	DYW_deaminase	1	40	127	88	102.6	1.3e-29	1
AT2G16440.1 | Symbols: MCM4 | Minichromosome maintenance (MCM2/3/5) family protein | chr2:7126536-7130665 REVERSE LENGTH=847	135	222	134	251	PF14551.4	MCM_N	1	2	86	93	39.1	8.1e-10	1
AT2G16440.1 | Symbols: MCM4 | Minichromosome maintenance (MCM2/3/5) family protein | chr2:7126536-7130665 REVERSE LENGTH=847	236	365	235	366	PF17207.1	MCM_OB	1	2	125	130	126.7	4.2e-37	1
AT2G16440.1 | Symbols: MCM4 | Minichromosome maintenance (MCM2/3/5) family protein | chr2:7126536-7130665 REVERSE LENGTH=847	423	748	422	749	PF00493.21	MCM	1	2	330	332	459.5	5.3e-138	1
AT2G16060.1 | Symbols: GLB1, AHB1, ARATH GLB1, NSHB1, ATGLB1, HB1 | hemoglobin 1 | chr2:6982782-6983522 REVERSE LENGTH=160	13	121	13	122	PF00042.20	Globin	1	1	109	113	69.6	2.7e-19	1
AT2G07698.1 | Symbols: | ATPase, F1 complex, alpha subunit protein | chr2:3361474-3364028 FORWARD LENGTH=777	298	364	296	364	PF02874.21	ATP-synt_ab_N	1	3	69	67	63.3	2e-17	1
AT2G07698.1 | Symbols: | ATPase, F1 complex, alpha subunit protein | chr2:3361474-3364028 FORWARD LENGTH=777	421	645	421	645	PF00006.23	ATP-synt_ab	1	1	213	225	243.6	1.5e-72	1
AT2G07698.1 | Symbols: | ATPase, F1 complex, alpha subunit protein | chr2:3361474-3364028 FORWARD LENGTH=777	652	750	652	771	PF00306.25	ATP-synt_ab_C	1	1	99	99	125.1	1.8e-36	1
AT2G06990.1 | Symbols: HEN2 | RNA helicase, ATP-dependent, SK12/DOB1 protein | chr2:2895135-2900909 FORWARD LENGTH=995	84	230	83	234	PF00270.27	DEAD	1	2	171	170	63.4	2e-17	1
AT2G06990.1 | Symbols: HEN2 | RNA helicase, ATP-dependent, SK12/DOB1 protein | chr2:2895135-2900909 FORWARD LENGTH=995	391	478	322	478	PF00271.29	Helicase_C	1	32	111	88	28.9	1.1e-06	1
AT2G06990.1 | Symbols: HEN2 | RNA helicase, ATP-dependent, SK12/DOB1 protein | chr2:2895135-2900909 FORWARD LENGTH=995	534	792	534	793	PF13234.4	rRNA_proc-arch	1	1	269	271	231.7	1.3e-68	1
AT2G06990.1 | Symbols: HEN2 | RNA helicase, ATP-dependent, SK12/DOB1 protein | chr2:2895135-2900909 FORWARD LENGTH=995	820	990	819	990	PF08148.10	DSHCT	1	2	164	175	164.6	1.3e-48	1
AT2G05710.1 | Symbols: ACO3 | aconitase 3 | chr2:2141591-2146350 FORWARD LENGTH=990	157	660	155	660	PF00330.18	Aconitase	1	1	462	506	604.7	1.1e-181	1
AT2G05710.1 | Symbols: ACO3 | aconitase 3 | chr2:2141591-2146350 FORWARD LENGTH=990	789	916	788	918	PF00694.17	Aconitase_C	1	2	129	128	160.1	3.1e-47	1
AT2G04030.1 | Symbols: CR88, EMB1956, HSP90.5, Hsp88.1, AtHsp90.5 | Chaperone protein htpG family protein | chr2:1281983-1285909 FORWARD LENGTH=780	100	259	99	261	PF02518.24	HATPase_c	1	2	109	168	49.6	4.7e-13	1
AT2G04030.1 | Symbols: CR88, EMB1956, HSP90.5, Hsp88.1, AtHsp90.5 | Chaperone protein htpG family protein | chr2:1281983-1285909 FORWARD LENGTH=780	264	759	264	767	PF00183.16	HSP90	1	1	512	515	634	1.8e-190	1
AT2G03760.1 | Symbols: ST, ATST1, RAR047, ST1, AtSOT1, AtSOT12, SOT12 | sulphotransferase 12 | chr2:1149475-1150455 REVERSE LENGTH=326	65	321	65	321	PF00685.25	Sulfotransfer_1	1	1	267	275	239.8	3.2e-71	1
AT2G03640.3 | Symbols: | Nuclear transport factor 2 (NTF2) family protein with RNA binding (RRM-RBD-RNP motifs) domain | chr2:1104525-1106418 REVERSE LENGTH=454	15	131	15	131	PF02136.18	NTF2	1	1	120	124	98.1	4.5e-28	1
AT2G03640.3 | Symbols: | Nuclear transport factor 2 (NTF2) family protein with RNA binding (RRM-RBD-RNP motifs) domain | chr2:1104525-1106418 REVERSE LENGTH=454	278	336	278	347	PF00076.20	RRM_1	1	1	58	60	34.4	1.3e-08	1
AT2G01210.1 | Symbols: | Leucine-rich repeat protein kinase family protein | chr2:119509-121734 REVERSE LENGTH=716	22	61	21	62	PF08263.10	LRRNT_2	1	2	40	40	48.9	5.1e-13	1
AT2G01210.1 | Symbols: | Leucine-rich repeat protein kinase family protein | chr2:119509-121734 REVERSE LENGTH=716	161	181	161	183	PF00560.31	LRR_1	1	1	21	21	10	1	1
AT2G01210.1 | Symbols: | Leucine-rich repeat protein kinase family protein | chr2:119509-121734 REVERSE LENGTH=716	410	704	406	707	PF00069.23	Pkinase	1	7	258	306	118.2	3.7e-34	1
AT2G16950.1 | Symbols: TRN1, ATTRN1 | transportin 1 | chr2:7353939-7360637 FORWARD LENGTH=895	38	104	37	105	PF03810.17	IBN_N	1	2	73	74	57.9	6.4e-16	1
AT2G16950.1 | Symbols: TRN1, ATTRN1 | transportin 1 | chr2:7353939-7360637 FORWARD LENGTH=895	411	464	411	465	PF13513.4	HEAT_EZ	1	1	54	54	50.5	1.8e-13	1
AT2G17420.1 | Symbols: NTRA, ATNTRA, NTR2 | NADPH-dependent thioredoxin reductase A | chr2:7564357-7566219 FORWARD LENGTH=378	55	356	54	356	PF07992.12	Pyr_redox_2	1	2	292	316	161.9	1.8e-47	1
AT1G80930.1 | Symbols: | MIF4G domain-containing protein / MA3 domain-containing protein | chr1:30405774-30409499 REVERSE LENGTH=900	650	756	650	756	PF02847.15	MA3	1	1	113	114	106.1	8.7e-31	1
AT2G17700.1 | Symbols: | ACT-like protein tyrosine kinase family protein | chr2:7685778-7689278 REVERSE LENGTH=546	286	535	286	535	PF07714.15	Pkinase_Tyr	1	1	260	262	242.2	4.8e-72	1
AT2G17510.2 | Symbols: EMB2763 | ribonuclease II family protein | chr2:7609395-7616242 REVERSE LENGTH=1012	97	220	97	221	PF13638.4	PIN_4	1	1	130	131	60.7	1.5e-16	1
AT2G17510.2 | Symbols: EMB2763 | ribonuclease II family protein | chr2:7609395-7616242 REVERSE LENGTH=1012	262	366	258	377	PF17216.1	Rrp44_CSD1	1	5	110	106	46.3	3e-12	1
AT2G17510.2 | Symbols: EMB2763 | ribonuclease II family protein | chr2:7609395-7616242 REVERSE LENGTH=1012	536	877	536	878	PF00773.17	RNB	1	1	324	346	303.3	2e-90	1
AT2G17510.2 | Symbols: EMB2763 | ribonuclease II family protein | chr2:7609395-7616242 REVERSE LENGTH=1012	928	998	927	1007	PF17215.1	Rrp44_S1	1	2	77	76	34	1.9e-08	1
AT2G18150.1 | Symbols: | Peroxidase superfamily protein | chr2:7892298-7893586 REVERSE LENGTH=338	52	300	52	300	PF00141.21	peroxidase	1	1	229	250	256.5	2.1e-76	1
AT2G18330.1 | Symbols: | AAA-type ATPase family protein | chr2:7965829-7968915 FORWARD LENGTH=636	53	319	49	319	PF12037.6	DUF3523	1	5	265	267	343	9.5e-103	1
AT2G18330.1 | Symbols: | AAA-type ATPase family protein | chr2:7965829-7968915 FORWARD LENGTH=636	388	515	388	515	PF00004.27	AAA	1	1	132	133	90.5	1.1e-25	1
AT2G17870.1 | Symbols: ATCSP3, CSP3 | cold shock domain protein 3 | chr2:7764276-7765181 REVERSE LENGTH=301	13	76	11	77	PF00313.20	CSD	1	3	65	64	78.7	2e-22	1
AT2G17870.1 | Symbols: ATCSP3, CSP3 | cold shock domain protein 3 | chr2:7764276-7765181 REVERSE LENGTH=301	95	110	94	110	PF00098.21	zf-CCHC	7	2	17	16	30.4	2.3e-07	1
AT2G17870.1 | Symbols: ATCSP3, CSP3 | cold shock domain protein 3 | chr2:7764276-7765181 REVERSE LENGTH=301	131	147	130	147	PF00098.21	zf-CCHC		2	18	17	24.8	1.4e-05	1
AT2G17870.1 | Symbols: ATCSP3, CSP3 | cold shock domain protein 3 | chr2:7764276-7765181 REVERSE LENGTH=301	161	176	161	177	PF00098.21	zf-CCHC		1	16	16	28.7	8.5e-07	1
AT2G17870.1 | Symbols: ATCSP3, CSP3 | cold shock domain protein 3 | chr2:7764276-7765181 REVERSE LENGTH=301	197	213	196	213	PF00098.21	zf-CCHC		2	18	17	24.9	1.3e-05	1
AT2G17870.1 | Symbols: ATCSP3, CSP3 | cold shock domain protein 3 | chr2:7764276-7765181 REVERSE LENGTH=301	225	241	224	241	PF00098.21	zf-CCHC		2	18	17	24.5	1.8e-05	1
AT2G17870.1 | Symbols: ATCSP3, CSP3 | cold shock domain protein 3 | chr2:7764276-7765181 REVERSE LENGTH=301	252	268	252	269	PF00098.21	zf-CCHC		1	17	17	27.1	2.6e-06	1
AT2G17870.1 | Symbols: ATCSP3, CSP3 | cold shock domain protein 3 | chr2:7764276-7765181 REVERSE LENGTH=301	282	299	282	299	PF00098.21	zf-CCHC		1	18	18	30.2	2.8e-07	1
AT2G20010.2 | Symbols: | Protein of unknown function (DUF810) | chr2:8637977-8641184 REVERSE LENGTH=952	15	717	15	718	PF05664.9	DUF810	1	1	674	709	884.3	5.5e-266	1
AT2G20450.1 | Symbols: | Ribosomal protein L14 | chr2:8813923-8815071 FORWARD LENGTH=134	45	117	44	118	PF01929.15	Ribosomal_L14e	1	2	74	73	95.1	2.4e-27	1
AT2G20490.1 | Symbols: NOP10, EDA27 | nucleolar RNA-binding Nop10p family protein | chr2:8831897-8832723 FORWARD LENGTH=64	3	52	3	52	PF04135.10	Nop10p	1	1	52	52	72.2	2.4e-20	1
AT2G20530.1 | Symbols: ATPHB6, PHB6 | prohibitin 6 | chr2:8842300-8843787 FORWARD LENGTH=286	36	211	35	225	PF01145.23	Band_7	1	2	177	182	82.1	4.3e-23	1
AT2G20760.1 | Symbols: | Clathrin light chain protein | chr2:8943279-8945108 REVERSE LENGTH=338	82	241	7	244	PF01086.15	Clathrin_lg_ch	1	89	211	164	29.6	6.3e-07	1
AT2G20990.3 | Symbols: SYTA | synaptotagmin A | chr2:9014827-9017829 FORWARD LENGTH=579	67	224	67	240	PF17047.3	SMP_LBD	1	1	155	160	46.4	2.7e-12	1
AT2G20990.3 | Symbols: SYTA | synaptotagmin A | chr2:9014827-9017829 FORWARD LENGTH=579	298	395	298	402	PF00168.28	C2	2	1	96	98	77.7	6.4e-22	1
AT2G20990.3 | Symbols: SYTA | synaptotagmin A | chr2:9014827-9017829 FORWARD LENGTH=579	459	561	458	561	PF00168.28	C2		2	103	107	56	3.5e-15	1
AT2G21160.1 | Symbols: | Translocon-associated protein (TRAP), alpha subunit | chr2:9068428-9070207 FORWARD LENGTH=258	24	247	1	258	PF03896.14	TRAP_alpha	1	29	263	238	112.4	2e-32	1
AT2G21170.1 | Symbols: TIM, PDTPI | triosephosphate isomerase | chr2:9071047-9073106 REVERSE LENGTH=315	67	305	66	305	PF00121.16	TIM	1	2	243	242	294.3	5.6e-88	1
AT2G20360.1 | Symbols: | NAD(P)-binding Rossmann-fold superfamily protein | chr2:8786070-8789098 FORWARD LENGTH=402	75	271	75	272	PF13460.4	NAD_binding_10	1	1	183	209	47	2.4e-12	1
AT2G21390.1 | Symbols: | Coatomer, alpha subunit | chr2:9152428-9156577 FORWARD LENGTH=1218	45	79	41	79	PF00400.30	WD40	3	5	38	35	23.3	7.5e-05	1
AT2G21390.1 | Symbols: | Coatomer, alpha subunit | chr2:9152428-9156577 FORWARD LENGTH=1218	84	121	83	121	PF00400.30	WD40		2	38	38	34.3	2.5e-08	1
AT2G21390.1 | Symbols: | Coatomer, alpha subunit | chr2:9152428-9156577 FORWARD LENGTH=1218	126	163	125	163	PF00400.30	WD40		2	38	38	31.8	1.5e-07	1
AT2G21390.1 | Symbols: | Coatomer, alpha subunit | chr2:9152428-9156577 FORWARD LENGTH=1218	211	291	210	305	PF12894.5	ANAPC4_WD40	1	2	81	81	24	3.3e-05	1
AT2G21390.1 | Symbols: | Coatomer, alpha subunit | chr2:9152428-9156577 FORWARD LENGTH=1218	341	768	337	769	PF04053.12	Coatomer_WDAD	1	5	444	456	445.9	1.6e-133	1
AT2G21390.1 | Symbols: | Coatomer, alpha subunit | chr2:9152428-9156577 FORWARD LENGTH=1218	815	1218	815	1218	PF06957.9	COPI_C	1	1	404	413	539.6	3.7e-162	1
AT2G21580.1 | Symbols: | Ribosomal protein S25 family protein | chr2:9236629-9237510 FORWARD LENGTH=108	11	105	4	105	PF03297.13	Ribosomal_S25	1	7	101	95	143.4	2e-42	1
AT1G80670.1 | Symbols: | Transducin/WD40 repeat-like superfamily protein | chr1:30320809-30323543 REVERSE LENGTH=349	24	52	12	53	PF00400.30	WD40	4	12	37	29	17.9	0.0039	1
AT1G80670.1 | Symbols: | Transducin/WD40 repeat-like superfamily protein | chr1:30320809-30323543 REVERSE LENGTH=349	70	99	64	99	PF00400.30	WD40		9	37	30	12.8	0.15	1
AT1G80670.1 | Symbols: | Transducin/WD40 repeat-like superfamily protein | chr1:30320809-30323543 REVERSE LENGTH=349	113	142	105	142	PF00400.30	WD40		10	38	30	18.8	0.002	1
AT1G80670.1 | Symbols: | Transducin/WD40 repeat-like superfamily protein | chr1:30320809-30323543 REVERSE LENGTH=349	235	274	231	274	PF00400.30	WD40		5	38	40	14.4	0.049	1
AT2G21620.2 | Symbols: RD2 | Adenine nucleotide alpha hydrolases-like superfamily protein | chr2:9248749-9249986 FORWARD LENGTH=193	40	173	39	173	PF00582.24	Usp	1	3	141	140	75.9	4e-21	1
AT2G22090.2 | Symbols: UBA1A | RNA-binding (RRM/RBD/RNP motifs) family protein | chr2:9389407-9390450 REVERSE LENGTH=347	106	173	106	175	PF00076.20	RRM_1	1	1	68	69	61	6.5e-17	1
AT2G22400.1 | Symbols: | S-adenosyl-L-methionine-dependent methyltransferases superfamily protein | chr2:9504823-9508788 REVERSE LENGTH=808	180	366	178	377	PF01189.15	Methyltr_RsmB-F	1	3	163	188	113.8	7.3e-33	1
AT2G23350.1 | Symbols: PAB4, PABP4 | poly(A) binding protein 4 | chr2:9943209-9946041 FORWARD LENGTH=662	48	117	48	118	PF00076.20	RRM_1	4	1	69	70	63.9	8.3e-18	1
AT2G23350.1 | Symbols: PAB4, PABP4 | poly(A) binding protein 4 | chr2:9943209-9946041 FORWARD LENGTH=662	136	204	136	204	PF00076.20	RRM_1		1	69	69	76.2	1.2e-21	1
AT2G23350.1 | Symbols: PAB4, PABP4 | poly(A) binding protein 4 | chr2:9943209-9946041 FORWARD LENGTH=662	227	295	227	296	PF00076.20	RRM_1		1	69	69	84.9	2.2e-24	1
AT2G23350.1 | Symbols: PAB4, PABP4 | poly(A) binding protein 4 | chr2:9943209-9946041 FORWARD LENGTH=662	330	398	330	399	PF00076.20	RRM_1		1	69	69	70.8	5.5e-20	1
AT2G23350.1 | Symbols: PAB4, PABP4 | poly(A) binding protein 4 | chr2:9943209-9946041 FORWARD LENGTH=662	564	630	563	630	PF00658.16	PABP	1	2	68	67	91.2	3.1e-26	1
AT2G23930.1 | Symbols: SNRNP-G | probable small nuclear ribonucleoprotein G | chr2:10182353-10183026 FORWARD LENGTH=80	9	71	8	72	PF01423.20	LSM	1	2	66	65	76.1	1.1e-21	1
AT2G24200.1 | Symbols: | Cytosol aminopeptidase family protein | chr2:10287017-10289450 REVERSE LENGTH=520	36	168	36	169	PF02789.15	Peptidase_M17_N	1	1	125	135	89.1	1.8e-25	1
AT2G24200.1 | Symbols: | Cytosol aminopeptidase family protein | chr2:10287017-10289450 REVERSE LENGTH=520	205	511	203	511	PF00883.19	Peptidase_M17	1	3	310	314	391.2	3e-117	1
AT2G26400.1 | Symbols: ARD, ATARD3, ARD3 | acireductone dioxygenase 3 | chr2:11232058-11233274 REVERSE LENGTH=199	14	168	14	168	PF03079.12	ARD	1	1	157	157	203.4	1.9e-60	1
AT2G26890.1 | Symbols: GRV2, KAM2 | DNAJ heat shock N-terminal domain-containing protein | chr2:11462327-11473841 REVERSE LENGTH=2554	1171	1213	1169	1213	PF14237.4	DUF4339	1	2	44	43	40.2	2e-10	1
AT2G26890.1 | Symbols: GRV2, KAM2 | DNAJ heat shock N-terminal domain-containing protein | chr2:11462327-11473841 REVERSE LENGTH=2554	1537	1577	1530	1581	PF00226.29	DnaJ	1	11	54	44	43.7	2e-11	1
AT2G27100.1 | Symbols: SE | C2H2 zinc-finger protein SERRATE (SE) | chr2:11572587-11576357 FORWARD LENGTH=720	199	280	199	292	PF12066.6	DUF3546	1	1	82	82	76.2	1.9e-21	1
AT2G27100.1 | Symbols: SE | C2H2 zinc-finger protein SERRATE (SE) | chr2:11572587-11576357 FORWARD LENGTH=720	436	630	431	634	PF04959.11	ARS2	1	6	191	200	121.3	6e-35	1
AT1G79920.1 | Symbols: | Heat shock protein 70 (Hsp 70) family protein | chr1:30058935-30062224 REVERSE LENGTH=831	3	694	3	696	PF00012.18	HSP70	1	1	597	695	537.1	3.9e-161	1
AT2G27720.2 | Symbols: | 60S acidic ribosomal protein family | chr2:11818696-11819370 FORWARD LENGTH=130	46	129	41	129	PF00428.17	Ribosomal_60s	1	15	88	84	71.4	6.2e-20	1
AT2G27880.1 | Symbols: AGO5 | Argonaute family protein | chr2:11871488-11876712 FORWARD LENGTH=997	158	292	158	292	PF16486.3	ArgoN	1	1	129	140	114.9	3.5e-33	1
AT2G27880.1 | Symbols: AGO5 | Argonaute family protein | chr2:11871488-11876712 FORWARD LENGTH=997	302	357	302	357	PF08699.8	ArgoL1	1	1	51	56	69.9	9.2e-20	1
AT2G27880.1 | Symbols: AGO5 | Argonaute family protein | chr2:11871488-11876712 FORWARD LENGTH=997	364	487	362	488	PF02170.20	PAZ	1	3	137	137	78.1	4.9e-22	1
AT2G27880.1 | Symbols: AGO5 | Argonaute family protein | chr2:11871488-11876712 FORWARD LENGTH=997	497	542	497	542	PF16488.3	ArgoL2	1	1	47	48	53.6	1.9e-14	1
AT2G27880.1 | Symbols: AGO5 | Argonaute family protein | chr2:11871488-11876712 FORWARD LENGTH=997	553	630	552	632	PF16487.3	ArgoMid	1	2	82	81	33.5	3.5e-08	1
AT2G27880.1 | Symbols: AGO5 | Argonaute family protein | chr2:11871488-11876712 FORWARD LENGTH=997	639	957	638	958	PF02171.15	Piwi	1	2	300	323	348.4	2.9e-104	1
AT2G28000.1 | Symbols: CPN60A, CH-CPN60A, SLP | chaperonin-60alpha | chr2:11926603-11929184 FORWARD LENGTH=586	68	571	68	571	PF00118.22	Cpn60_TCP1	1	1	491	556	325.7	4.1e-97	1
AT2G30110.1 | Symbols: ATUBA1, MOS5, UBA1 | ubiquitin-activating enzyme 1 | chr2:12852632-12857369 REVERSE LENGTH=1080	79	453	78	465	PF00899.19	ThiF	1	2	223	381	99.7	1.4e-28	1
AT2G30110.1 | Symbols: ATUBA1, MOS5, UBA1 | ubiquitin-activating enzyme 1 | chr2:12852632-12857369 REVERSE LENGTH=1080	252	323	252	323	PF16190.3	E1_FCCH	1	1	71	72	97.3	4.1e-28	1
AT2G30110.1 | Symbols: ATUBA1, MOS5, UBA1 | ubiquitin-activating enzyme 1 | chr2:12852632-12857369 REVERSE LENGTH=1080	324	393	324	393	PF16191.3	E1_4HB	1	1	70	70	83.9	6e-24	1
AT2G30110.1 | Symbols: ATUBA1, MOS5, UBA1 | ubiquitin-activating enzyme 1 | chr2:12852632-12857369 REVERSE LENGTH=1080	475	974	475	979	PF00899.19	ThiF	1	1	238	505	242.5	3.5e-72	1
AT2G30110.1 | Symbols: ATUBA1, MOS5, UBA1 | ubiquitin-activating enzyme 1 | chr2:12852632-12857369 REVERSE LENGTH=1080	662	915	662	915	PF10585.7	UBA_e1_thiolCys	1	1	252	255	271.1	1.1e-80	1
AT2G30110.1 | Symbols: ATUBA1, MOS5, UBA1 | ubiquitin-activating enzyme 1 | chr2:12852632-12857369 REVERSE LENGTH=1080	986	1075	986	1075	PF09358.8	E1_UFD	1	1	93	93	74.4	8.5e-21	1
AT2G29960.1 | Symbols: CYP5, ATCYP5, CYP19-4 | cyclophilin 5 | chr2:12769183-12770528 REVERSE LENGTH=201	38	195	35	198	PF00160.19	Pro_isomerase	1	4	156	169	165.9	7.3e-49	1
AT2G30970.1 | Symbols: ASP1 | aspartate aminotransferase 1 | chr2:13179012-13181686 FORWARD LENGTH=430	58	423	57	423	PF00155.19	Aminotran_1_2	1	2	363	385	316.2	2.8e-94	1
AT2G31670.1 | Symbols: | Stress responsive alpha-beta barrel domain protein | chr2:13472699-13473490 REVERSE LENGTH=263	49	143	49	144	PF07876.10	Dabb	2	1	96	97	86.2	1.6e-24	1
AT2G31670.1 | Symbols: | Stress responsive alpha-beta barrel domain protein | chr2:13472699-13473490 REVERSE LENGTH=263	159	254	158	254	PF07876.10	Dabb		2	97	97	65.8	3.6e-18	1
AT2G31725.1 | Symbols: | Eukaryotic protein of unknown function (DUF842) | chr2:13486447-13487391 REVERSE LENGTH=149	21	143	19	144	PF05811.11	DUF842	1	3	130	128	130.7	2.4e-38	1
AT2G32060.1 | Symbols: | Ribosomal protein L7Ae/L30e/S12e/Gadd45 family protein | chr2:13639228-13640104 REVERSE LENGTH=144	30	123	29	124	PF01248.24	Ribosomal_L7Ae	1	2	94	94	96.4	5.5e-28	1
AT2G32080.1 | Symbols: PUR ALPHA-1 | purin-rich alpha 1 | chr2:13642716-13644036 REVERSE LENGTH=296	30	157	11	159	PF04845.11	PurA	2	82	217	142	78.7	3.5e-22	1
AT2G32080.1 | Symbols: PUR ALPHA-1 | purin-rich alpha 1 | chr2:13642716-13644036 REVERSE LENGTH=296	218	273	196	276	PF04845.11	PurA		161	216	56	45.4	5.5e-12	1
AT2G27020.1 | Symbols: PAG1 | 20S proteasome alpha subunit G1 | chr2:11528515-11530858 REVERSE LENGTH=249	8	30	8	30	PF10584.7	Proteasome_A_N	1	1	23	23	49.7	1.8e-13	1
AT2G27020.1 | Symbols: PAG1 | 20S proteasome alpha subunit G1 | chr2:11528515-11530858 REVERSE LENGTH=249	32	216	31	216	PF00227.24	Proteasome	1	2	190	189	172.8	5e-51	1
AT2G39010.1 | Symbols: PIP2E, PIP2;6 | plasma membrane intrinsic protein 2E | chr2:16291564-16293746 FORWARD LENGTH=289	30	265	30	265	PF00230.18	MIP	1	1	227	236	274.7	5.6e-82	1
AT2G38750.1 | Symbols: ANNAT4 | annexin 4 | chr2:16196582-16198431 REVERSE LENGTH=319	90	155	90	155	PF00191.18	Annexin	3	1	66	66	39.1	5.3e-10	1
AT2G38750.1 | Symbols: ANNAT4 | annexin 4 | chr2:16196582-16198431 REVERSE LENGTH=319	174	223	173	229	PF00191.18	Annexin		2	48	50	23.4	4.3e-05	1
AT2G38750.1 | Symbols: ANNAT4 | annexin 4 | chr2:16196582-16198431 REVERSE LENGTH=319	258	314	245	314	PF00191.18	Annexin		9	66	60	32.8	4.9e-08	1
AT2G38540.1 | Symbols: LP1, LTP1, ATLTP1 | lipid transfer protein 1 | chr2:16130418-16130893 FORWARD LENGTH=118	29	114	12	114	PF00234.20	Tryp_alpha_amyl	1	1	90	105	33.2	4.8e-08	1
AT2G38410.1 | Symbols: | ENTH/VHS/GAT family protein | chr2:16086912-16090047 REVERSE LENGTH=671	6	129	2	140	PF00790.17	VHS	1	5	130	127	112.1	1.7e-32	1
AT2G38410.1 | Symbols: | ENTH/VHS/GAT family protein | chr2:16086912-16090047 REVERSE LENGTH=671	245	317	242	318	PF03127.12	GAT	1	4	76	74	61.9	4.8e-17	1
AT2G37760.2 | Symbols: | NAD(P)-linked oxidoreductase superfamily protein | chr2:15831995-15833742 FORWARD LENGTH=311	27	277	23	282	PF00248.19	Aldo_ket_red	1	20	286	285	168.4	1.8e-49	1
AT2G37690.1 | Symbols: | phosphoribosylaminoimidazole carboxylase, putative / AIR carboxylase, putative | chr2:15806111-15810240 FORWARD LENGTH=642	198	369	197	369	PF02222.20	ATP-grasp	1	2	171	172	201	9.1e-60	1
AT2G37690.1 | Symbols: | phosphoribosylaminoimidazole carboxylase, putative / AIR carboxylase, putative | chr2:15806111-15810240 FORWARD LENGTH=642	476	622	476	623	PF00731.18	AIRC	1	1	147	147	220	8.4e-66	1
AT2G37340.1 | Symbols: RSZ33, ATRSZ33, RS2Z33, AT-RS2Z33 | arginine/serine-rich zinc knuckle-containing protein 33 | chr2:15670372-15672331 REVERSE LENGTH=290	13	74	13	75	PF00076.20	RRM_1	1	1	69	69	51.3	7e-14	1
AT2G37340.1 | Symbols: RSZ33, ATRSZ33, RS2Z33, AT-RS2Z33 | arginine/serine-rich zinc knuckle-containing protein 33 | chr2:15670372-15672331 REVERSE LENGTH=290	100	115	99	116	PF00098.21	zf-CCHC	2	2	17	16	29.6	4.2e-07	1
AT2G37340.1 | Symbols: RSZ33, ATRSZ33, RS2Z33, AT-RS2Z33 | arginine/serine-rich zinc knuckle-containing protein 33 | chr2:15670372-15672331 REVERSE LENGTH=290	121	138	121	138	PF00098.21	zf-CCHC		1	18	18	23.4	4e-05	1
AT2G36620.1 | Symbols: RPL24A | ribosomal protein L24 | chr2:15350548-15351819 REVERSE LENGTH=164	3	67	3	68	PF01246.18	Ribosomal_L24e	1	1	65	65	100.9	3e-29	1
AT2G36480.3 | Symbols: | ENTH/VHS family protein | chr2:15302567-15306274 REVERSE LENGTH=886	8	61	8	64	PF04818.11	CTD_bind	1	1	58	58	30.3	5.1e-07	1
AT2G36390.1 | Symbols: SBE2.1, BE3 | starch branching enzyme 2.1 | chr2:15264283-15269940 FORWARD LENGTH=858	205	287	204	288	PF02922.16	CBM_48	1	2	82	87	70	1.5e-19	1
AT2G36390.1 | Symbols: SBE2.1, BE3 | starch branching enzyme 2.1 | chr2:15264283-15269940 FORWARD LENGTH=858	353	425	350	449	PF00128.22	Alpha-amylase	1	10	81	73	46.8	2.7e-12	1
AT2G36390.1 | Symbols: SBE2.1, BE3 | starch branching enzyme 2.1 | chr2:15264283-15269940 FORWARD LENGTH=858	742	836	742	837	PF02806.16	Alpha-amylase_C	1	1	95	98	88.2	3.3e-25	1
AT2G35605.1 | Symbols: | SWIB/MDM2 domain superfamily protein | chr2:14946161-14947027 FORWARD LENGTH=109	34	105	32	105	PF02201.16	SWIB	1	3	74	72	103	5.3e-30	1
AT2G33410.1 | Symbols: | RNA-binding (RRM/RBD/RNP motifs) family protein | chr2:14156085-14157435 FORWARD LENGTH=404	8	71	8	76	PF00076.20	RRM_1	2	1	65	66	54.6	6.5e-15	1
AT2G33410.1 | Symbols: | RNA-binding (RRM/RBD/RNP motifs) family protein | chr2:14156085-14157435 FORWARD LENGTH=404	112	169	112	183	PF00076.20	RRM_1		1	57	58	56.4	1.7e-15	1
AT2G33340.1 | Symbols: MAC3B | MOS4-associated complex 3B | chr2:14126584-14131000 REVERSE LENGTH=525	66	131	65	132	PF08606.9	Prp19	1	2	67	66	108	1.5e-31	1
AT2G33340.1 | Symbols: MAC3B | MOS4-associated complex 3B | chr2:14126584-14131000 REVERSE LENGTH=525	254	291	254	292	PF00400.30	WD40	4	1	37	38	34.8	1.7e-08	1
AT2G33340.1 | Symbols: MAC3B | MOS4-associated complex 3B | chr2:14126584-14131000 REVERSE LENGTH=525	301	337	299	337	PF00400.30	WD40		3	38	37	14.7	0.04	1
AT2G33340.1 | Symbols: MAC3B | MOS4-associated complex 3B | chr2:14126584-14131000 REVERSE LENGTH=525	387	422	385	422	PF00400.30	WD40		3	38	37	21.4	0.00031	1
AT2G33340.1 | Symbols: MAC3B | MOS4-associated complex 3B | chr2:14126584-14131000 REVERSE LENGTH=525	478	507	468	507	PF00400.30	WD40		8	37	30	15.5	0.022	1
AT2G40660.1 | Symbols: | Nucleic acid-binding, OB-fold-like protein | chr2:16966011-16968866 FORWARD LENGTH=389	234	329	234	329	PF01588.18	tRNA_bind	1	1	96	96	87.4	4.6e-25	1
AT2G41100.1 | Symbols: TCH3, ATCAL4 | Calcium-binding EF hand family protein | chr2:17138131-17139406 FORWARD LENGTH=324	14	73	10	74	PF13499.4	EF-hand_7	3	5	70	66	55.9	3.9e-15	1
AT2G41100.1 | Symbols: TCH3, ATCAL4 | Calcium-binding EF hand family protein | chr2:17138131-17139406 FORWARD LENGTH=324	103	162	91	163	PF13499.4	EF-hand_7		5	70	66	53.7	1.9e-14	1
AT2G41100.1 | Symbols: TCH3, ATCAL4 | Calcium-binding EF hand family protein | chr2:17138131-17139406 FORWARD LENGTH=324	192	252	190	253	PF13499.4	EF-hand_7		4	70	67	54.8	8.6e-15	1
AT2G41530.1 | Symbols: ATSFGH, SFGH | S-formylglutathione hydrolase | chr2:17323656-17325430 REVERSE LENGTH=284	25	275	25	277	PF00756.18	Esterase	1	1	249	263	200.5	3.1e-59	1
AT2G40290.1 | Symbols: | Eukaryotic translation initiation factor 2 subunit 1 | chr2:16829030-16830889 REVERSE LENGTH=344	18	92	17	92	PF00575.21	S1	1	2	75	76	48.8	6.1e-13	1
AT2G40290.1 | Symbols: | Eukaryotic translation initiation factor 2 subunit 1 | chr2:16829030-16830889 REVERSE LENGTH=344	130	260	130	260	PF07541.10	EIF_2_alpha	1	1	116	136	133.1	4.3e-39	1
AT2G42490.1 | Symbols: | Copper amine oxidase family protein | chr2:17691600-17695526 REVERSE LENGTH=776	205	309	205	309	PF02728.14	Cu_amine_oxidN3	1	1	101	106	109.5	7.9e-32	1
AT2G42490.1 | Symbols: | Copper amine oxidase family protein | chr2:17691600-17695526 REVERSE LENGTH=776	335	747	334	747	PF01179.18	Cu_amine_oxid	1	2	406	416	518.5	1.1e-155	1
AT2G42520.1 | Symbols: | P-loop containing nucleoside triphosphate hydrolases superfamily protein | chr2:17705382-17708744 FORWARD LENGTH=633	183	363	183	363	PF00270.27	DEAD	1	1	176	185	174.1	2.1e-51	1
AT2G42520.1 | Symbols: | P-loop containing nucleoside triphosphate hydrolases superfamily protein | chr2:17705382-17708744 FORWARD LENGTH=633	398	513	397	513	PF00271.29	Helicase_C	1	2	111	117	100.1	8.3e-29	1
AT2G43650.1 | Symbols: EMB2777 | Sas10/U3 ribonucleoprotein (Utp) family protein | chr2:18099430-18103147 FORWARD LENGTH=654	243	323	243	323	PF04000.13	Sas10_Utp3	1	1	79	83	59.2	4.2e-16	1
AT2G43650.1 | Symbols: EMB2777 | Sas10/U3 ribonucleoprotein (Utp) family protein | chr2:18099430-18103147 FORWARD LENGTH=654	582	654	581	654	PF09368.8	Sas10	1	2	74	73	82.8	1.6e-23	1
AT2G43750.1 | Symbols: OASB, ACS1, CPACS1, ATCS-B | O-acetylserine (thiol) lyase B | chr2:18129604-18132322 REVERSE LENGTH=392	81	365	79	367	PF00291.23	PALP	1	3	292	299	222.6	6.3e-66	1
AT2G43810.1 | Symbols: | Small nuclear ribonucleoprotein family protein | chr2:18149725-18150879 FORWARD LENGTH=91	17	81	17	82	PF01423.20	LSM	1	1	66	66	65.8	1.9e-18	1
AT2G32930.2 | Symbols: ZFN2 | zinc finger nuclease 2 | chr2:13965814-13968419 REVERSE LENGTH=467	46	70	45	71	PF00642.22	zf-CCCH	5	2	26	25	35.1	7.6e-09	1
AT2G32930.2 | Symbols: ZFN2 | zinc finger nuclease 2 | chr2:13965814-13968419 REVERSE LENGTH=467	95	111	94	111	PF00642.22	zf-CCCH		11	27	17	21.2	0.00018	1
AT2G32930.2 | Symbols: ZFN2 | zinc finger nuclease 2 | chr2:13965814-13968419 REVERSE LENGTH=467	131	155	130	156	PF00642.22	zf-CCCH		2	26	25	36.2	3.5e-09	1
AT2G32930.2 | Symbols: ZFN2 | zinc finger nuclease 2 | chr2:13965814-13968419 REVERSE LENGTH=467	264	288	262	288	PF00642.22	zf-CCCH		3	27	25	40.3	1.8e-10	1
AT2G32930.2 | Symbols: ZFN2 | zinc finger nuclease 2 | chr2:13965814-13968419 REVERSE LENGTH=467	309	333	308	334	PF00642.22	zf-CCCH		2	26	25	32	7.4e-08	1
AT2G43920.1 | Symbols: HOL2, ATHOL2 | S-adenosyl-L-methionine-dependent methyltransferases superfamily protein | chr2:18189319-18191248 REVERSE LENGTH=227	32	217	31	225	PF05724.9	TPMT	1	2	200	202	217.8	1.2e-64	1
AT2G44060.1 | Symbols: | Late embryogenesis abundant protein, group 2 | chr2:18226922-18227988 FORWARD LENGTH=325	89	182	88	184	PF03168.11	LEA_2	2	2	99	98	55.4	6e-15	1
AT2G44060.1 | Symbols: | Late embryogenesis abundant protein, group 2 | chr2:18226922-18227988 FORWARD LENGTH=325	214	308	214	309	PF03168.11	LEA_2		1	100	100	46	5.1e-12	1
AT2G44350.2 | Symbols: ATCS, CSY4 | Citrate synthase family protein | chr2:18316673-18320524 FORWARD LENGTH=474	79	457	79	457	PF00285.19	Citrate_synt	1	1	362	389	352.7	2e-105	1
AT2G44650.1 | Symbols: CHL-CPN10, CPN10 | chloroplast chaperonin 10 | chr2:18419521-18420510 REVERSE LENGTH=139	51	138	51	138	PF00166.19	Cpn10	1	1	93	96	56.1	2.7e-15	1
AT2G45240.1 | Symbols: MAP1A | methionine aminopeptidase 1A | chr2:18656059-18658906 FORWARD LENGTH=398	16	59	14	60	PF15801.3	zf-C6H2	1	4	46	45	50.6	1.5e-13	1
AT2G45240.1 | Symbols: MAP1A | methionine aminopeptidase 1A | chr2:18656059-18658906 FORWARD LENGTH=398	149	376	148	376	PF00557.22	Peptidase_M24	1	2	209	231	185.4	9.7e-55	1
AT2G45290.1 | Symbols: | Transketolase | chr2:18672737-18675589 FORWARD LENGTH=741	83	414	81	414	PF00456.19	Transketolase_N	1	4	334	333	511	1.1e-153	1
AT2G45290.1 | Symbols: | Transketolase | chr2:18672737-18675589 FORWARD LENGTH=741	432	602	431	603	PF02779.22	Transket_pyr	1	4	176	177	152	1.2e-44	1
AT2G45290.1 | Symbols: | Transketolase | chr2:18672737-18675589 FORWARD LENGTH=741	627	732	622	733	PF02780.18	Transketolase_C	1	9	123	116	47.5	1.3e-12	1
AT2G46280.1 | Symbols: TRIP-1, TIF3I1 | TGF-beta receptor interacting protein 1 | chr2:19003656-19005393 REVERSE LENGTH=328	43	80	42	80	PF00400.30	WD40	4	2	38	38	34.8	1.8e-08	1
AT2G46280.1 | Symbols: TRIP-1, TIF3I1 | TGF-beta receptor interacting protein 1 | chr2:19003656-19005393 REVERSE LENGTH=328	146	176	138	176	PF00400.30	WD40		8	38	31	17.4	0.0055	1
AT2G46280.1 | Symbols: TRIP-1, TIF3I1 | TGF-beta receptor interacting protein 1 | chr2:19003656-19005393 REVERSE LENGTH=328	191	221	181	221	PF00400.30	WD40		9	38	31	21.9	0.0002	1
AT2G46280.1 | Symbols: TRIP-1, TIF3I1 | TGF-beta receptor interacting protein 1 | chr2:19003656-19005393 REVERSE LENGTH=328	285	316	280	318	PF00400.30	WD40		6	36	32	26.6	6.9e-06	1
AT2G46520.1 | Symbols: | cellular apoptosis susceptibility protein, putative / importin-alpha re-exporter, putative | chr2:19096867-19099785 FORWARD LENGTH=972	29	103	29	104	PF03810.17	IBN_N	1	1	73	75	49.2	3.4e-13	1
AT2G46520.1 | Symbols: | cellular apoptosis susceptibility protein, putative / importin-alpha re-exporter, putative | chr2:19096867-19099785 FORWARD LENGTH=972	162	530	162	530	PF08506.8	Cse1	1	1	370	374	498.7	7.3e-150	1
AT2G46520.1 | Symbols: | cellular apoptosis susceptibility protein, putative / importin-alpha re-exporter, putative | chr2:19096867-19099785 FORWARD LENGTH=972	531	962	531	963	PF03378.13	CAS_CSE1	1	1	442	444	556.7	2.6e-167	1
AT2G47510.1 | Symbols: FUM1 | fumarase 1 | chr2:19498614-19502020 FORWARD LENGTH=492	40	370	40	370	PF00206.18	Lyase_1	1	1	312	333	388.4	2.3e-116	1
AT2G47510.1 | Symbols: FUM1 | fumarase 1 | chr2:19498614-19502020 FORWARD LENGTH=492	436	489	436	489	PF10415.7	FumaraseC_C	1	1	54	54	84.8	3.5e-24	1
AT2G47730.1 | Symbols: ATGSTF8, ATGSTF5, GST6, GSTF8 | glutathione S-transferase phi 8 | chr2:19558213-19559266 FORWARD LENGTH=263	51	125	50	125	PF02798.18	GST_N	1	2	76	75	69.1	2.7e-19	1
AT2G47730.1 | Symbols: ATGSTF8, ATGSTF5, GST6, GSTF8 | glutathione S-transferase phi 8 | chr2:19558213-19559266 FORWARD LENGTH=263	160	252	157	252	PF00043.23	GST_C	1	4	93	93	58.7	4.6e-16	1
AT2G47850.1 | Symbols: | Zinc finger C-x8-C-x5-C-x3-H type family protein | chr2:19595953-19598119 FORWARD LENGTH=468	48	72	46	72	PF00642.22	zf-CCCH	5	3	27	25	33.8	2.1e-08	1
AT2G47850.1 | Symbols: | Zinc finger C-x8-C-x5-C-x3-H type family protein | chr2:19595953-19598119 FORWARD LENGTH=468	91	117	91	117	PF00642.22	zf-CCCH		1	27	27	40.4	1.7e-10	1
AT2G47850.1 | Symbols: | Zinc finger C-x8-C-x5-C-x3-H type family protein | chr2:19595953-19598119 FORWARD LENGTH=468	141	163	137	163	PF00642.22	zf-CCCH		5	27	23	35.4	6.2e-09	1
AT2G47850.1 | Symbols: | Zinc finger C-x8-C-x5-C-x3-H type family protein | chr2:19595953-19598119 FORWARD LENGTH=468	291	316	290	316	PF00642.22	zf-CCCH		2	27	26	36.5	2.9e-09	1
AT2G47850.1 | Symbols: | Zinc finger C-x8-C-x5-C-x3-H type family protein | chr2:19595953-19598119 FORWARD LENGTH=468	337	362	336	362	PF00642.22	zf-CCCH		2	27	26	32.9	3.7e-08	1
AT2G45810.1 | Symbols: | DEA(D/H)-box RNA helicase family protein | chr2:18859836-18862318 FORWARD LENGTH=528	179	342	178	344	PF00270.27	DEAD	1	2	174	173	152.3	9.8e-45	1
AT2G45810.1 | Symbols: | DEA(D/H)-box RNA helicase family protein | chr2:18859836-18862318 FORWARD LENGTH=528	380	486	377	486	PF00271.29	Helicase_C	1	4	111	111	96.2	1.3e-27	1
AT2G27510.1 | Symbols: ATFD3, FD3 | ferredoxin 3 | chr2:11758281-11758748 REVERSE LENGTH=155	68	141	66	141	PF00111.25	Fer2	1	3	78	77	77.2	6.4e-22	1
AT3G01280.1 | Symbols: VDAC1, ATVDAC1 | voltage dependent anion channel 1 | chr3:85754-87612 FORWARD LENGTH=276	5	269	4	269	PF01459.20	Porin_3	1	2	270	273	232.4	5.7e-69	1
AT3G02230.1 | Symbols: RGP1, ATRGP1 | reversibly glycosylated polypeptide 1 | chr3:415463-417304 FORWARD LENGTH=357	18	352	17	353	PF03214.11	RGP	1	2	341	340	596.4	1.4e-179	1
AT3G02770.1 | Symbols: | Ribonuclease E inhibitor RraA/Dimethylmenaquinone methyltransferase | chr3:601017-601884 REVERSE LENGTH=166	6	159	6	159	PF03737.13	Methyltransf_6	1	1	148	159	147.5	2.8e-43	1
AT3G02830.1 | Symbols: ZFN1 | zinc finger protein 1 | chr3:614075-615916 FORWARD LENGTH=397	42	67	41	67	PF00642.22	zf-CCCH	5	2	27	26	31.7	9.1e-08	1
AT3G02830.1 | Symbols: ZFN1 | zinc finger protein 1 | chr3:614075-615916 FORWARD LENGTH=397	88	112	87	112	PF00642.22	zf-CCCH		3	27	25	37.7	1.2e-09	1
AT3G02830.1 | Symbols: ZFN1 | zinc finger protein 1 | chr3:614075-615916 FORWARD LENGTH=397	134	158	132	158	PF00642.22	zf-CCCH		3	27	25	37.2	1.7e-09	1
AT3G02830.1 | Symbols: ZFN1 | zinc finger protein 1 | chr3:614075-615916 FORWARD LENGTH=397	276	301	275	301	PF00642.22	zf-CCCH		2	27	26	33.7	2.1e-08	1
AT3G02830.1 | Symbols: ZFN1 | zinc finger protein 1 | chr3:614075-615916 FORWARD LENGTH=397	322	347	321	347	PF00642.22	zf-CCCH		2	27	26	33.8	2.1e-08	1
AT3G03920.1 | Symbols: | H/ACA ribonucleoprotein complex, subunit Gar1/Naf1 protein | chr3:1009123-1010379 REVERSE LENGTH=202	50	149	40	155	PF04410.12	Gar1	1	12	124	115	119.3	1.1e-34	1
AT3G04120.1 | Symbols: GAPC, GAPC-1, GAPC1 | glyceraldehyde-3-phosphate dehydrogenase C subunit 1 | chr3:1081077-1083131 FORWARD LENGTH=338	6	109	6	109	PF00044.22	Gp_dh_N	1	1	101	104	117.1	3.4e-34	1
AT3G04120.1 | Symbols: GAPC, GAPC-1, GAPC1 | glyceraldehyde-3-phosphate dehydrogenase C subunit 1 | chr3:1081077-1083131 FORWARD LENGTH=338	161	318	161	318	PF02800.18	Gp_dh_C	1	1	158	158	238	2.9e-71	1
AT3G04610.1 | Symbols: FLK | RNA-binding KH domain-containing protein | chr3:1250762-1254272 REVERSE LENGTH=577	189	241	188	243	PF00013.27	KH_1	3	2	55	54	51.5	5.9e-14	1
AT3G04610.1 | Symbols: FLK | RNA-binding KH domain-containing protein | chr3:1250762-1254272 REVERSE LENGTH=577	279	346	278	347	PF00013.27	KH_1		2	65	68	54.7	5.9e-15	1
AT3G04610.1 | Symbols: FLK | RNA-binding KH domain-containing protein | chr3:1250762-1254272 REVERSE LENGTH=577	459	522	459	523	PF00013.27	KH_1		1	65	66	36.4	3.1e-09	1
AT3G04620.1 | Symbols: | Alba DNA/RNA-binding protein | chr3:1255660-1256739 REVERSE LENGTH=164	38	100	38	101	PF01918.19	Alba	1	1	66	67	46.3	2.5e-12	1
AT3G05000.1 | Symbols: | Transport protein particle (TRAPP) component | chr3:1387444-1388697 REVERSE LENGTH=173	12	172	10	172	PF04051.14	TRAPP	1	3	146	174	152.5	5.5e-45	1
AT3G06860.1 | Symbols: MFP2, ATMFP2 | multifunctional protein 2 | chr3:2161926-2166009 FORWARD LENGTH=725	16	205	14	218	PF00378.18	ECH_1	1	4	191	191	135.8	1.4e-39	1
AT3G06860.1 | Symbols: MFP2, ATMFP2 | multifunctional protein 2 | chr3:2161926-2166009 FORWARD LENGTH=725	314	492	314	493	PF02737.16	3HCDH_N		1	179	179	206.5	2.6e-61	1
AT3G06860.1 | Symbols: MFP2, ATMFP2 | multifunctional protein 2 | chr3:2161926-2166009 FORWARD LENGTH=725	495	588	495	588	PF00725.20	3HCDH		1	97	97	74	1e-20	1
AT3G07110.2 | Symbols: | Ribosomal protein L13 family protein | chr3:2252092-2253332 FORWARD LENGTH=207	12	118	10	122	PF00572.16	Ribosomal_L13	1	3	120	119	38.2	1.3e-09	1
AT3G07160.1 | Symbols: ATGSL10, gsl10, CALS9 | glucan synthase-like 10 | chr3:2265142-2279383 REVERSE LENGTH=1890	334	447	333	448	PF14288.4	FKS1_dom1	1	2	103	120	116.5	5.8e-34	1
AT3G07160.1 | Symbols: ATGSL10, gsl10, CALS9 | glucan synthase-like 10 | chr3:2265142-2279383 REVERSE LENGTH=1890	1023	1705	1022	1798	PF02364.13	Glucan_synthase	1	2	730	747	795.5	5.2e-239	1
AT3G07320.1 | Symbols: | O-Glycosyl hydrolases family 17 protein | chr3:2332324-2333925 REVERSE LENGTH=460	26	346	25	347	PF00332.16	Glyco_hydro_17	1	2	308	322	343.2	1.3e-102	1
AT3G07320.1 | Symbols: | O-Glycosyl hydrolases family 17 protein | chr3:2332324-2333925 REVERSE LENGTH=460	371	442	370	442	PF07983.11	X8	1	2	76	77	64.3	1.1e-17	1
AT3G07230.1 | Symbols: | wound-responsive protein-related | chr3:2299920-2300183 FORWARD LENGTH=46	1	46	1	46	PF08186.9	Wound_ind	1	1	44	50	77.3	8e-22	1
AT3G07660.1 | Symbols: | Kinase-related protein of unknown function (DUF1296) | chr3:2445275-2450372 REVERSE LENGTH=841	10	70	10	70	PF06972.9	DUF1296	1	1	60	61	102.8	6.9e-30	1
AT3G07810.2 | Symbols: | RNA-binding (RRM/RBD/RNP motifs) family protein | chr3:2492875-2495102 FORWARD LENGTH=495	8	69	8	75	PF00076.20	RRM_1	2	1	61	62	54.1	8.9e-15	1
AT3G07810.2 | Symbols: | RNA-binding (RRM/RBD/RNP motifs) family protein | chr3:2492875-2495102 FORWARD LENGTH=495	110	167	110	182	PF00076.20	RRM_1		1	57	58	60.3	1.1e-16	1
AT3G08580.1 | Symbols: AAC1 | ADP/ATP carrier 1 | chr3:2605706-2607030 REVERSE LENGTH=381	79	175	77	176	PF00153.25	Mito_carr	3	4	96	97	80.6	5.2e-23	1
AT3G08580.1 | Symbols: AAC1 | ADP/ATP carrier 1 | chr3:2605706-2607030 REVERSE LENGTH=381	182	278	181	281	PF00153.25	Mito_carr		2	94	97	83.9	5.1e-24	1
AT3G08580.1 | Symbols: AAC1 | ADP/ATP carrier 1 | chr3:2605706-2607030 REVERSE LENGTH=381	285	368	283	375	PF00153.25	Mito_carr		4	90	87	58.5	4.2e-16	1
AT3G09440.1 | Symbols: | Heat shock protein 70 (Hsp 70) family protein | chr3:2903434-2905632 REVERSE LENGTH=649	9	618	9	618	PF00012.18	HSP70	1	1	599	614	863.8	4.7e-260	1
AT3G09630.1 | Symbols: | Ribosomal protein L4/L1 family | chr3:2953813-2955444 FORWARD LENGTH=406	29	268	27	269	PF00573.20	Ribosomal_L4	1	3	191	248	139.4	1e-40	1
AT3G09630.1 | Symbols: | Ribosomal protein L4/L1 family | chr3:2953813-2955444 FORWARD LENGTH=406	281	354	281	355	PF14374.4	Ribos_L4_asso_C	1	1	75	75	104.1	2.6e-30	1
AT3G10360.1 | Symbols: APUM4, PUM4 | pumilio 4 | chr3:3211276-3215144 REVERSE LENGTH=1003	313	663	313	663	PF07990.10	NABP	1	1	412	412	163.4	1.1e-47	1
AT3G10360.1 | Symbols: APUM4, PUM4 | pumilio 4 | chr3:3211276-3215144 REVERSE LENGTH=1003	664	698	664	698	PF00806.17	PUF	8	1	35	35	25.1	8.2e-06	1
AT3G10360.1 | Symbols: APUM4, PUM4 | pumilio 4 | chr3:3211276-3215144 REVERSE LENGTH=1003	704	732	700	734	PF00806.17	PUF		5	33	29	31.5	7.5e-08	1
AT3G10360.1 | Symbols: APUM4, PUM4 | pumilio 4 | chr3:3211276-3215144 REVERSE LENGTH=1003	738	766	736	770	PF00806.17	PUF		3	31	29	21.9	8.7e-05	1
AT3G10360.1 | Symbols: APUM4, PUM4 | pumilio 4 | chr3:3211276-3215144 REVERSE LENGTH=1003	773	806	772	806	PF00806.17	PUF		2	35	34	26.9	2.2e-06	1
AT3G10360.1 | Symbols: APUM4, PUM4 | pumilio 4 | chr3:3211276-3215144 REVERSE LENGTH=1003	809	842	808	842	PF00806.17	PUF		2	35	34	29.9	2.5e-07	1
AT3G10360.1 | Symbols: APUM4, PUM4 | pumilio 4 | chr3:3211276-3215144 REVERSE LENGTH=1003	848	878	845	879	PF00806.17	PUF		4	34	31	31.9	5.9e-08	1
AT3G10360.1 | Symbols: APUM4, PUM4 | pumilio 4 | chr3:3211276-3215144 REVERSE LENGTH=1003	882	912	881	914	PF00806.17	PUF		2	32	31	22.4	5.8e-05	1
AT3G10360.1 | Symbols: APUM4, PUM4 | pumilio 4 | chr3:3211276-3215144 REVERSE LENGTH=1003	931	949	928	954	PF00806.17	PUF		9	27	19	24	1.9e-05	1
AT3G10920.1 | Symbols: MSD1, MEE33, ATMSD1 | manganese superoxide dismutase 1 | chr3:3418015-3419581 FORWARD LENGTH=231	30	111	30	111	PF00081.20	Sod_Fe_N	1	1	82	82	120.7	2.4e-35	1
AT3G10920.1 | Symbols: MSD1, MEE33, ATMSD1 | manganese superoxide dismutase 1 | chr3:3418015-3419581 FORWARD LENGTH=231	121	223	121	225	PF02777.16	Sod_Fe_C	1	1	100	103	119.8	4.4e-35	1
AT3G11130.1 | Symbols: | Clathrin, heavy chain | chr3:3482575-3491667 REVERSE LENGTH=1705	20	56	20	56	PF01394.18	Clathrin_propel	2	1	37	37	29.5	5.4e-07	1
AT3G11130.1 | Symbols: | Clathrin, heavy chain | chr3:3482575-3491667 REVERSE LENGTH=1705	154	197	154	197	PF01394.18	Clathrin_propel		1	37	44	43.2	2.4e-11	1
AT3G11130.1 | Symbols: | Clathrin, heavy chain | chr3:3482575-3491667 REVERSE LENGTH=1705	344	367	344	367	PF09268.8	Clathrin-link	1	1	24	24	37.6	8.8e-10	1
AT3G11130.1 | Symbols: | Clathrin, heavy chain | chr3:3482575-3491667 REVERSE LENGTH=1705	369	434	369	434	PF13838.4	Clathrin_H_link	1	1	66	66	104.2	2.2e-30	1
AT3G11130.1 | Symbols: | Clathrin, heavy chain | chr3:3482575-3491667 REVERSE LENGTH=1705	557	690	552	693	PF00637.18	Clathrin	7	7	140	136	76.8	1.4e-21	1
AT3G11130.1 | Symbols: | Clathrin, heavy chain | chr3:3482575-3491667 REVERSE LENGTH=1705	701	840	700	841	PF00637.18	Clathrin		2	142	143	74.5	7e-21	1
AT3G11130.1 | Symbols: | Clathrin, heavy chain | chr3:3482575-3491667 REVERSE LENGTH=1705	850	983	847	985	PF00637.18	Clathrin		4	141	138	99.8	1e-28	1
AT3G11130.1 | Symbols: | Clathrin, heavy chain | chr3:3482575-3491667 REVERSE LENGTH=1705	993	1131	993	1136	PF00637.18	Clathrin		1	137	140	106.2	1.1e-30	1
AT3G11130.1 | Symbols: | Clathrin, heavy chain | chr3:3482575-3491667 REVERSE LENGTH=1705	1145	1281	1142	1282	PF00637.18	Clathrin		4	142	139	92.9	1.4e-26	1
AT3G11130.1 | Symbols: | Clathrin, heavy chain | chr3:3482575-3491667 REVERSE LENGTH=1705	1293	1432	1288	1433	PF00637.18	Clathrin		6	142	142	98.8	2.2e-28	1
AT3G11130.1 | Symbols: | Clathrin, heavy chain | chr3:3482575-3491667 REVERSE LENGTH=1705	1439	1579	1437	1579	PF00637.18	Clathrin		3	143	144	104.7	3.3e-30	1
AT3G07720.1 | Symbols: | Galactose oxidase/kelch repeat superfamily protein | chr3:2465439-2467033 FORWARD LENGTH=329	32	82	32	83	PF13415.4	Kelch_3	1	1	48	51	42.7	4.1e-11	1
AT3G07720.1 | Symbols: | Galactose oxidase/kelch repeat superfamily protein | chr3:2465439-2467033 FORWARD LENGTH=329	126	163	125	172	PF13418.4	Kelch_4	1	2	41	40	43.4	2.1e-11	1
AT3G07720.1 | Symbols: | Galactose oxidase/kelch repeat superfamily protein | chr3:2465439-2467033 FORWARD LENGTH=329	176	216	175	219	PF01344.23	Kelch_1	1	2	43	42	26.6	2.9e-06	1
AT3G11510.1 | Symbols: | Ribosomal protein S11 family protein | chr3:3623757-3624866 REVERSE LENGTH=150	28	146	28	146	PF00411.17	Ribosomal_S11	1	1	110	119	162.1	4.3e-48	1
AT3G11830.1 | Symbols: | TCP-1/cpn60 chaperonin family protein | chr3:3732734-3736156 FORWARD LENGTH=557	37	528	35	530	PF00118.22	Cpn60_TCP1	1	3	489	497	517.6	2.8e-155	1
AT3G12490.2 | Symbols: ATCYSB, ATCYS6, CYSB | cystatin B | chr3:3960523-3961876 REVERSE LENGTH=234	48	124	45	125	PF16845.3	SQAPI	1	5	82	78	73.5	1.2e-20	1
AT3G12130.1 | Symbols: | KH domain-containing protein / zinc finger (CCCH type) family protein | chr3:3864486-3866406 REVERSE LENGTH=248	38	61	37	62	PF00642.22	zf-CCCH	1	2	25	24	22.4	7.4e-05	1
AT3G12130.1 | Symbols: | KH domain-containing protein / zinc finger (CCCH type) family protein | chr3:3864486-3866406 REVERSE LENGTH=248	115	178	115	179	PF00013.27	KH_1	1	1	65	66	43.8	1.6e-11	1
AT3G12130.1 | Symbols: | KH domain-containing protein / zinc finger (CCCH type) family protein | chr3:3864486-3866406 REVERSE LENGTH=248	214	239	214	239	PF00642.22	zf-CCCH	7	1	27	27	34.9	8.7e-09	1
AT3G12680.1 | Symbols: HUA1 | floral homeotic protein (HUA1) | chr3:4025276-4028999 REVERSE LENGTH=524	177	200	176	201	PF00642.22	zf-CCCH		3	26	24	33.8	2e-08	1
AT3G12680.1 | Symbols: HUA1 | floral homeotic protein (HUA1) | chr3:4025276-4028999 REVERSE LENGTH=524	227	252	226	252	PF00642.22	zf-CCCH		2	27	26	30.2	2.7e-07	1
AT3G12680.1 | Symbols: HUA1 | floral homeotic protein (HUA1) | chr3:4025276-4028999 REVERSE LENGTH=524	274	295	269	295	PF00642.22	zf-CCCH		6	27	22	35.7	5.1e-09	1
AT3G12680.1 | Symbols: HUA1 | floral homeotic protein (HUA1) | chr3:4025276-4028999 REVERSE LENGTH=524	342	367	341	367	PF00642.22	zf-CCCH		2	27	26	38.5	6.7e-10	1
AT3G12680.1 | Symbols: HUA1 | floral homeotic protein (HUA1) | chr3:4025276-4028999 REVERSE LENGTH=524	422	446	421	447	PF00642.22	zf-CCCH		2	26	25	40.9	1.2e-10	1
AT3G12680.1 | Symbols: HUA1 | floral homeotic protein (HUA1) | chr3:4025276-4028999 REVERSE LENGTH=524	478	500	475	500	PF00642.22	zf-CCCH		5	27	23	41.5	7.7e-11	1
AT3G12915.1 | Symbols: | Ribosomal protein S5/Elongation factor G/III/V family protein | chr3:4112999-4115708 FORWARD LENGTH=820	1	320	1	320	PF00009.25	GTP_EFTU	1	6	194	326	206.6	2.3e-61	1
AT3G12915.1 | Symbols: | Ribosomal protein S5/Elongation factor G/III/V family protein | chr3:4112999-4115708 FORWARD LENGTH=820	371	445	369	446	PF03144.23	GTP_EFTU_D2	1	3	73	75	53.6	2e-14	1
AT3G12915.1 | Symbols: | Ribosomal protein S5/Elongation factor G/III/V family protein | chr3:4112999-4115708 FORWARD LENGTH=820	465	525	463	530	PF14492.4	EFG_II	1	4	65	62	42.8	3.8e-11	1
AT3G12915.1 | Symbols: | Ribosomal protein S5/Elongation factor G/III/V family protein | chr3:4112999-4115708 FORWARD LENGTH=820	588	699	582	699	PF03764.16	EFG_IV	1	11	121	113	109.3	8.9e-32	1
AT3G12915.1 | Symbols: | Ribosomal protein S5/Elongation factor G/III/V family protein | chr3:4112999-4115708 FORWARD LENGTH=820	701	788	701	789	PF00679.22	EFG_C	1	1	87	88	70.2	1e-19	1
AT3G13150.1 | Symbols: | Tetratricopeptide repeat (TPR)-like superfamily protein | chr3:4227975-4229630 REVERSE LENGTH=551	131	153	128	153	PF01535.18	PPR	3	9	31	23	13.3	0.071	1
AT3G13150.1 | Symbols: | Tetratricopeptide repeat (TPR)-like superfamily protein | chr3:4227975-4229630 REVERSE LENGTH=551	159	185	158	186	PF01535.18	PPR		2	28	27	21.7	0.00014	1
AT3G13150.1 | Symbols: | Tetratricopeptide repeat (TPR)-like superfamily protein | chr3:4227975-4229630 REVERSE LENGTH=551	191	238	191	240	PF13041.4	PPR_2	2	1	48	48	51.4	8.3e-14	1
AT3G13150.1 | Symbols: | Tetratricopeptide repeat (TPR)-like superfamily protein | chr3:4227975-4229630 REVERSE LENGTH=551	265	294	264	294	PF01535.18	PPR		2	31	30	17.1	0.0041	1
AT3G13150.1 | Symbols: | Tetratricopeptide repeat (TPR)-like superfamily protein | chr3:4227975-4229630 REVERSE LENGTH=551	296	345	296	345	PF13041.4	PPR_2		1	50	50	57.9	8e-16	1
AT3G13160.1 | Symbols: | Tetratricopeptide repeat (TPR)-like superfamily protein | chr3:4229994-4231178 REVERSE LENGTH=394	112	152	110	153	PF13041.4	PPR_2	3	9	49	41	31.2	1.7e-07	1
AT3G13160.1 | Symbols: | Tetratricopeptide repeat (TPR)-like superfamily protein | chr3:4229994-4231178 REVERSE LENGTH=394	175	220	175	222	PF13041.4	PPR_2		1	46	46	51.6	7e-14	1
AT3G13160.1 | Symbols: | Tetratricopeptide repeat (TPR)-like superfamily protein | chr3:4229994-4231178 REVERSE LENGTH=394	246	293	245	294	PF13041.4	PPR_2		2	49	48	39	6e-10	1
AT3G13160.1 | Symbols: | Tetratricopeptide repeat (TPR)-like superfamily protein | chr3:4229994-4231178 REVERSE LENGTH=394	319	343	318	348	PF01535.18	PPR	1	2	26	25	11.4	0.28	1
AT3G13290.1 | Symbols: VCR | varicose-related | chr3:4297529-4303113 FORWARD LENGTH=1340	169	482	166	486	PF16529.3	Ge1_WD40	1	6	323	340	81.6	4.7e-23	1
AT3G13470.1 | Symbols: | TCP-1/cpn60 chaperonin family protein | chr3:4389685-4392624 FORWARD LENGTH=596	74	577	74	578	PF00118.22	Cpn60_TCP1	1	1	490	555	339.7	2.4e-101	1
AT3G03070.1 | Symbols: | NADH-ubiquinone oxidoreductase-related | chr3:696593-698069 REVERSE LENGTH=110	67	104	67	104	PF10276.7	zf-CHCC	1	1	37	38	52.6	3.1e-14	1
AT3G13570.1 | Symbols: SCL30A, At-SCL30A | SC35-like splicing factor 30A | chr3:4429564-4431602 REVERSE LENGTH=262	39	108	39	109	PF00076.20	RRM_1	1	1	69	70	70.7	5.8e-20	1
AT3G13860.1 | Symbols: HSP60-3A | heat shock protein 60-3A | chr3:4561704-4565133 REVERSE LENGTH=572	53	546	53	555	PF00118.22	Cpn60_TCP1	1	1	481	545	285.6	5.9e-85	1
AT3G15010.1 | Symbols: | RNA-binding (RRM/RBD/RNP motifs) family protein | chr3:5052844-5054058 FORWARD LENGTH=404	77	144	77	146	PF00076.20	RRM_1	2	1	68	69	53.5	1.4e-14	1
AT3G15010.1 | Symbols: | RNA-binding (RRM/RBD/RNP motifs) family protein | chr3:5052844-5054058 FORWARD LENGTH=404	169	226	169	238	PF00076.20	RRM_1		1	57	58	32.6	4.8e-08	1
AT3G13930.1 | Symbols: | Dihydrolipoamide acetyltransferase, long form protein | chr3:4596240-4600143 FORWARD LENGTH=539	113	185	112	186	PF00364.20	Biotin_lipoyl	1	2	72	73	68.7	2.6e-19	1
AT3G13930.1 | Symbols: | Dihydrolipoamide acetyltransferase, long form protein | chr3:4596240-4600143 FORWARD LENGTH=539	247	282	247	282	PF02817.15	E3_binding		1	36	36	59.3	3e-16	1
AT3G13930.1 | Symbols: | Dihydrolipoamide acetyltransferase, long form protein | chr3:4596240-4600143 FORWARD LENGTH=539	309	539	306	539	PF00198.21	2-oxoacid_dh	1	4	233	233	253.1	2e-75	1
AT3G15730.1 | Symbols: PLDALPHA1, PLD | phospholipase D alpha 1 | chr3:5330835-5333474 FORWARD LENGTH=810	39	128	8	128	PF00168.28	C2	1	18	103	92	52	6.4e-14	1
AT3G15730.1 | Symbols: PLDALPHA1, PLD | phospholipase D alpha 1 | chr3:5330835-5333474 FORWARD LENGTH=810	327	366	327	366	PF00614.20	PLDc	2	1	28	40	40.6	1.5e-10	1
AT3G15730.1 | Symbols: PLDALPHA1, PLD | phospholipase D alpha 1 | chr3:5330835-5333474 FORWARD LENGTH=810	657	683	656	683	PF00614.20	PLDc		2	28	27	31.3	1.4e-07	1
AT3G15730.1 | Symbols: PLDALPHA1, PLD | phospholipase D alpha 1 | chr3:5330835-5333474 FORWARD LENGTH=810	728	800	728	800	PF12357.6	PLD_C	1	1	72	73	95.2	1.4e-27	1
AT3G15660.1 | Symbols: ATGRX4, GRX4 | glutaredoxin 4 | chr3:5308134-5309383 REVERSE LENGTH=169	78	142	78	142	PF00462.22	Glutaredoxin	1	1	60	65	64	1e-17	1
AT2G47990.1 | Symbols: SWA1, EDA13, EDA19 | transducin family protein / WD-40 repeat family protein | chr2:19637010-19638602 REVERSE LENGTH=530	128	164	126	164	PF00400.30	WD40	2	4	38	37	12.8	0.16	1
AT2G47990.1 | Symbols: SWA1, EDA13, EDA19 | transducin family protein / WD-40 repeat family protein | chr2:19637010-19638602 REVERSE LENGTH=530	174	207	169	207	PF00400.30	WD40		7	38	34	18.9	0.0019	1
AT2G47990.1 | Symbols: SWA1, EDA13, EDA19 | transducin family protein / WD-40 repeat family protein | chr2:19637010-19638602 REVERSE LENGTH=530	381	522	380	523	PF09384.8	UTP15_C	1	2	147	146	122.8	8.6e-36	1
AT3G17390.1 | Symbols: MTO3, SAMS3, MAT4 | S-adenosylmethionine synthetase family protein | chr3:5952484-5953665 REVERSE LENGTH=393	4	101	3	101	PF00438.18	S-AdoMet_synt_N	1	2	99	98	148	9.4e-44	1
AT3G17390.1 | Symbols: MTO3, SAMS3, MAT4 | S-adenosylmethionine synthetase family protein | chr3:5952484-5953665 REVERSE LENGTH=393	118	238	117	238	PF02772.14	S-AdoMet_synt_M	1	2	118	122	157.3	1.5e-46	1
AT3G17390.1 | Symbols: MTO3, SAMS3, MAT4 | S-adenosylmethionine synthetase family protein | chr3:5952484-5953665 REVERSE LENGTH=393	240	381	240	382	PF02773.14	S-AdoMet_synt_C	1	1	137	142	203.9	8.3e-61	1
AT3G19390.1 | Symbols: | Granulin repeat cysteine protease family protein | chr3:6723024-6724768 FORWARD LENGTH=452	43	100	43	100	PF08246.10	Inhibitor_I29	1	1	58	58	52.1	6e-14	1
AT3G19390.1 | Symbols: | Granulin repeat cysteine protease family protein | chr3:6723024-6724768 FORWARD LENGTH=452	129	345	129	345	PF00112.21	Peptidase_C1	1	1	219	222	284	9.9e-85	1
AT3G19390.1 | Symbols: | Granulin repeat cysteine protease family protein | chr3:6723024-6724768 FORWARD LENGTH=452	374	420	374	421	PF00396.16	Granulin	1	1	41	47	38.5	9.4e-10	1
AT3G20050.1 | Symbols: ATTCP-1, TCP-1 | T-complex protein 1 alpha subunit | chr3:6998544-7002266 REVERSE LENGTH=545	31	536	31	538	PF00118.22	Cpn60_TCP1	1	1	489	507	509.5	7.7e-153	1
AT3G20330.1 | Symbols: PYRB | PYRIMIDINE B | chr3:7090354-7091904 REVERSE LENGTH=390	88	227	86	228	PF02729.19	OTCace_N	1	4	145	144	159.6	4.3e-47	1
AT3G20330.1 | Symbols: PYRB | PYRIMIDINE B | chr3:7090354-7091904 REVERSE LENGTH=390	234	385	234	386	PF00185.22	OTCace	1	1	156	159	113.3	9.6e-33	1
AT3G21210.1 | Symbols: | zinc ion binding | chr3:7438241-7440756 REVERSE LENGTH=804	15	146	14	146	PF00582.24	Usp	1	3	141	141	61.1	1.4e-16	1
AT3G21210.1 | Symbols: | zinc ion binding | chr3:7438241-7440756 REVERSE LENGTH=804	373	417	373	417	PF03107.14	C1_2	6	1	47	49	37.7	1.7e-09	1
AT3G21210.1 | Symbols: | zinc ion binding | chr3:7438241-7440756 REVERSE LENGTH=804	427	474	426	474	PF03107.14	C1_2		2	47	49	40.9	1.7e-10	1
AT3G21210.1 | Symbols: | zinc ion binding | chr3:7438241-7440756 REVERSE LENGTH=804	512	562	512	562	PF03107.14	C1_2		1	47	51	35	1.2e-08	1
AT3G21210.1 | Symbols: | zinc ion binding | chr3:7438241-7440756 REVERSE LENGTH=804	572	619	571	619	PF03107.14	C1_2		2	47	48	43.1	3.4e-11	1
AT3G21210.1 | Symbols: | zinc ion binding | chr3:7438241-7440756 REVERSE LENGTH=804	629	671	628	671	PF03107.14	C1_2		2	47	46	26	7.7e-06	1
AT3G21210.1 | Symbols: | zinc ion binding | chr3:7438241-7440756 REVERSE LENGTH=804	680	732	679	733	PF03107.14	C1_2		2	46	53	32.7	6.1e-08	1
AT3G22110.1 | Symbols: PAC1 | 20S proteasome alpha subunit C1 | chr3:7792819-7793571 REVERSE LENGTH=250	5	27	5	27	PF10584.7	Proteasome_A_N	1	1	23	23	50.5	1e-13	1
AT3G22110.1 | Symbols: PAC1 | 20S proteasome alpha subunit C1 | chr3:7792819-7793571 REVERSE LENGTH=250	30	214	28	215	PF00227.24	Proteasome	1	3	189	188	208.1	7.3e-62	1
AT3G22230.1 | Symbols: | Ribosomal L27e protein family | chr3:7844136-7844543 REVERSE LENGTH=135	52	135	52	135	PF01777.16	Ribosomal_L27e	1	1	85	85	110.3	4.1e-32	1
AT3G21540.1 | Symbols: | transducin family protein / WD-40 repeat family protein | chr3:7586100-7590856 REVERSE LENGTH=955	51	92	49	92	PF00400.30	WD40	7	3	38	43	15.8	0.017	1
AT3G21540.1 | Symbols: | transducin family protein / WD-40 repeat family protein | chr3:7586100-7590856 REVERSE LENGTH=955	98	134	96	134	PF00400.30	WD40		3	38	37	19.8	0.00099	1
AT3G21540.1 | Symbols: | transducin family protein / WD-40 repeat family protein | chr3:7586100-7590856 REVERSE LENGTH=955	142	176	138	176	PF00400.30	WD40		5	38	35	22.4	0.00015	1
AT3G21540.1 | Symbols: | transducin family protein / WD-40 repeat family protein | chr3:7586100-7590856 REVERSE LENGTH=955	181	217	180	217	PF00400.30	WD40		2	37	37	22.7	0.00011	1
AT3G21540.1 | Symbols: | transducin family protein / WD-40 repeat family protein | chr3:7586100-7590856 REVERSE LENGTH=955	402	433	395	433	PF00400.30	WD40		7	38	33	13.6	0.09	1
AT3G21540.1 | Symbols: | transducin family protein / WD-40 repeat family protein | chr3:7586100-7590856 REVERSE LENGTH=955	577	609	572	609	PF00400.30	WD40		6	37	33	24.9	2.3e-05	1
AT3G21540.1 | Symbols: | transducin family protein / WD-40 repeat family protein | chr3:7586100-7590856 REVERSE LENGTH=955	657	694	656	694	PF00400.30	WD40		2	38	38	26.6	6.8e-06	1
AT3G21540.1 | Symbols: | transducin family protein / WD-40 repeat family protein | chr3:7586100-7590856 REVERSE LENGTH=955	796	897	795	898	PF04003.10	Utp12	1	2	106	105	56.6	2.4e-15	1
AT3G23600.1 | Symbols: | alpha/beta-Hydrolases superfamily protein | chr3:8473833-8475655 FORWARD LENGTH=239	28	237	28	238	PF01738.16	DLH	1	1	216	220	91.9	3.6e-26	1
AT3G23390.1 | Symbols: | Zinc-binding ribosomal protein family protein | chr3:8375427-8376224 FORWARD LENGTH=105	19	94	19	94	PF00935.17	Ribosomal_L44	1	1	76	76	125	1.1e-36	1
AT3G23830.1 | Symbols: GR-RBP4, GRP4 | glycine-rich RNA-binding protein 4 | chr3:8606762-8607677 REVERSE LENGTH=136	37	107	37	107	PF00076.20	RRM_1	1	1	70	71	79.2	1.3e-22	1
AT3G25700.1 | Symbols: | Eukaryotic aspartyl protease family protein | chr3:9358937-9360295 FORWARD LENGTH=452	84	269	84	269	PF14543.4	TAXi_N	1	1	177	189	174.5	2.1e-51	1
AT3G25700.1 | Symbols: | Eukaryotic aspartyl protease family protein | chr3:9358937-9360295 FORWARD LENGTH=452	291	445	291	446	PF14541.4	TAXi_C	1	1	161	161	127.1	4.7e-37	1
AT3G25780.1 | Symbols: AOC3 | allene oxide cyclase 3 | chr3:9409362-9410409 FORWARD LENGTH=258	81	256	81	256	PF06351.9	Allene_ox_cyc	1	1	175	176	296	6.2e-89	1
AT3G26560.1 | Symbols: | ATP-dependent RNA helicase, putative | chr3:9750122-9753719 REVERSE LENGTH=1168	213	281	210	283	PF00575.21	S1	1	4	73	72	44.9	9.9e-12	1
AT3G26560.1 | Symbols: | ATP-dependent RNA helicase, putative | chr3:9750122-9753719 REVERSE LENGTH=1168	521	671	518	676	PF00270.27	DEAD	1	4	170	170	31.3	1.4e-07	1
AT3G26560.1 | Symbols: | ATP-dependent RNA helicase, putative | chr3:9750122-9753719 REVERSE LENGTH=1168	713	845	706	845	PF00271.29	Helicase_C	1	8	111	133	50.1	2.8e-13	1
AT3G26560.1 | Symbols: | ATP-dependent RNA helicase, putative | chr3:9750122-9753719 REVERSE LENGTH=1168	907	995	907	995	PF04408.21	HA2	1	1	102	102	88.7	2.4e-25	1
AT3G26560.1 | Symbols: | ATP-dependent RNA helicase, putative | chr3:9750122-9753719 REVERSE LENGTH=1168	1027	1128	960	1130	PF07717.14	OB_NTP_bind	1	31	112	102	84.4	5.3e-24	1
AT3G26760.1 | Symbols: | NAD(P)-binding Rossmann-fold superfamily protein | chr3:9843639-9844899 FORWARD LENGTH=300	45	290	45	290	PF13561.4	adh_short_C2	1	1	234	249	198.1	1.4e-58	1
AT3G22960.1 | Symbols: PKP1, PKP-ALPHA | Pyruvate kinase family protein | chr3:8139369-8141771 FORWARD LENGTH=596	117	462	116	469	PF00224.19	PK	1	2	341	349	302.8	2.4e-90	1
AT3G22960.1 | Symbols: PKP1, PKP-ALPHA | Pyruvate kinase family protein | chr3:8139369-8141771 FORWARD LENGTH=596	487	586	487	595	PF02887.14	PK_C	1	1	103	103	86.6	1.2e-24	1
AT3G27740.1 | Symbols: CARA | carbamoyl phosphate synthetase A | chr3:10281470-10283792 REVERSE LENGTH=430	58	184	57	185	PF00988.20	CPSase_sm_chain	1	2	126	127	150.2	2.3e-44	1
AT3G27740.1 | Symbols: CARA | carbamoyl phosphate synthetase A | chr3:10281470-10283792 REVERSE LENGTH=430	247	421	245	422	PF00117.26	GATase	1	3	189	188	154	3.5e-45	1
AT3G43190.1 | Symbols: SUS4, ATSUS4 | sucrose synthase 4 | chr3:15179204-15182577 REVERSE LENGTH=808	10	555	10	555	PF00862.17	Sucrose_synth	1	1	548	548	917.5	2e-276	1
AT3G43190.1 | Symbols: SUS4, ATSUS4 | sucrose synthase 4 | chr3:15179204-15182577 REVERSE LENGTH=808	566	730	558	742	PF00534.18	Glycos_transf_1	1	9	158	166	116.9	6.2e-34	1
AT3G44110.1 | Symbols: ATJ3, ATJ | DNAJ homologue 3 | chr3:15869115-15871059 REVERSE LENGTH=420	15	72	14	72	PF00226.29	DnaJ	1	2	63	62	76.7	9.8e-22	1
AT3G44110.1 | Symbols: ATJ3, ATJ | DNAJ homologue 3 | chr3:15869115-15871059 REVERSE LENGTH=420	122	343	121	343	PF01556.16	DnaJ_C	1	2	146	223	132.9	8.4e-39	1
AT3G44110.1 | Symbols: ATJ3, ATJ | DNAJ homologue 3 | chr3:15869115-15871059 REVERSE LENGTH=420	148	214	148	214	PF00684.17	DnaJ_CXXCXGXG	1	1	67	69	54	1.5e-14	1
AT3G44310.1 | Symbols: NIT1, ATNIT1, NITI | nitrilase 1 | chr3:15986901-15988841 FORWARD LENGTH=346	26	304	26	305	PF00795.20	CN_hydrolase	1	1	260	298	248.8	4.9e-74	1
AT3G22330.1 | Symbols: PMH2, ATRH53 | putative mitochondrial RNA helicase 2 | chr3:7892641-7895145 FORWARD LENGTH=616	128	295	128	298	PF00270.27	DEAD	1	1	173	177	160.7	2.6e-47	1
AT3G22330.1 | Symbols: PMH2, ATRH53 | putative mitochondrial RNA helicase 2 | chr3:7892641-7895145 FORWARD LENGTH=616	341	443	334	443	PF00271.29	Helicase_C	1	8	111	104	104.2	4.2e-30	1
AT3G19130.1 | Symbols: ATRBP47B, RBP47B | RNA-binding protein 47B | chr3:6611398-6613823 REVERSE LENGTH=435	110	176	110	179	PF00076.20	RRM_1	3	1	66	67	42.3	4.4e-11	1
AT3G19130.1 | Symbols: ATRBP47B, RBP47B | RNA-binding protein 47B | chr3:6611398-6613823 REVERSE LENGTH=435	204	274	204	275	PF00076.20	RRM_1		1	69	71	61.8	3.5e-17	1
AT3G19130.1 | Symbols: ATRBP47B, RBP47B | RNA-binding protein 47B | chr3:6611398-6613823 REVERSE LENGTH=435	323	387	323	387	PF00076.20	RRM_1		1	70	70	65.2	3.2e-18	1
AT3G46740.1 | Symbols: TOC75-III, MAR1 | translocon at the outer envelope membrane of chloroplasts 75-III | chr3:17216104-17219296 REVERSE LENGTH=818	486	801	486	817	PF01103.21	Bac_surface_Ag	1	1	303	341	58.4	7.4e-16	1
AT3G49430.1 | Symbols: SRp34a, SR34a, At-SR34a | SER/ARG-rich protein 34A | chr3:18332668-18334829 FORWARD LENGTH=300	9	76	9	76	PF00076.20	RRM_1	2	1	70	70	62.7	1.9e-17	1
AT3G49430.1 | Symbols: SRp34a, SR34a, At-SR34a | SER/ARG-rich protein 34A | chr3:18332668-18334829 FORWARD LENGTH=300	124	186	124	187	PF00076.20	RRM_1		1	66	66	43.2	2.3e-11	1
AT3G49601.1 | Symbols: | FUNCTIONS IN: molecular_function unknown; INVOLVED IN: biological_process unknown; LOCATED IN: cellular_component unknown; CONTAINS InterPro DOMAIN/s: mRNA splicing factor, Cwf21 (InterPro:IPR013170); Has 30201 Blast hits to 17322 proteins in 780 species: Archae - 12; Bacteria - 1396; Metazoa - 17338; Fungi - 3422; Plants - 5037; Viruses - 0; Other Eukaryotes - 2996 (sour…	59	100	59	102	PF08312.10	cwf21	1	1	42	42	38.7	7.4e-10	1
AT3G52730.1 | Symbols: | ubiquinol-cytochrome C reductase UQCRX/QCR9-like family protein | chr3:19543146-19544167 REVERSE LENGTH=72	15	63	14	65	PF05365.10	UCR_UQCRX_QCR9	1	2	50	49	78	3.4e-22	1
AT3G52880.2 | Symbols: ATMDAR1, MDAR1 | monodehydroascorbate reductase 1 | chr3:19601477-19604366 REVERSE LENGTH=466	50	353	50	364	PF07992.12	Pyr_redox_2	1	12	291	315	171.8	1.6e-50	1
AT3G53750.1 | Symbols: ACT3 | actin 3 | chr3:19915924-19917371 FORWARD LENGTH=377	5	377	4	377	PF00022.17	Actin	1	2	407	413	493.7	2.8e-148	1
AT3G52580.1 | Symbols: | Ribosomal protein S11 family protein | chr3:19503324-19504701 FORWARD LENGTH=150	28	146	28	146	PF00411.17	Ribosomal_S11	1	1	110	119	162.4	3.6e-48	1
AT3G54640.1 | Symbols: TSA1, TRP3 | tryptophan synthase alpha chain | chr3:20223331-20225303 REVERSE LENGTH=312	55	310	55	311	PF00290.18	Trp_syntA	1	1	257	258	319.3	1.1e-95	1
AT3G54110.1 | Symbols: ATPUMP1, UCP, PUMP1, ATUCP1, UCP1 | plant uncoupling mitochondrial protein 1 | chr3:20038890-20040996 FORWARD LENGTH=306	8	105	7	107	PF00153.25	Mito_carr	3	2	95	98	67.9	4.8e-19	1
AT3G54110.1 | Symbols: ATPUMP1, UCP, PUMP1, ATUCP1, UCP1 | plant uncoupling mitochondrial protein 1 | chr3:20038890-20040996 FORWARD LENGTH=306	111	206	110	207	PF00153.25	Mito_carr		2	95	96	75.8	1.8e-21	1
AT3G54110.1 | Symbols: ATPUMP1, UCP, PUMP1, ATUCP1, UCP1 | plant uncoupling mitochondrial protein 1 | chr3:20038890-20040996 FORWARD LENGTH=306	213	297	210	300	PF00153.25	Mito_carr		4	93	90	68.5	3.3e-19	1
AT3G55220.1 | Symbols: | Cleavage and polyadenylation specificity factor (CPSF) A subunit protein | chr3:20467116-20470944 REVERSE LENGTH=1214	75	589	75	589	PF10433.7	MMS1_N	1	1	490	544	559.5	5.3e-168	1
AT3G55220.1 | Symbols: | Cleavage and polyadenylation specificity factor (CPSF) A subunit protein | chr3:20467116-20470944 REVERSE LENGTH=1214	861	1180	860	1182	PF03178.13	CPSF_A	1	2	322	343	325.6	3.2e-97	1
AT3G54670.3 | Symbols: TTN8 | Structural maintenance of chromosomes (SMC) family protein | chr3:20235818-20243701 FORWARD LENGTH=1239	11	1221	10	1226	PF02463.17	SMC_N	1	2	215	1219	142.4	1.2e-41	1
AT3G54670.3 | Symbols: TTN8 | Structural maintenance of chromosomes (SMC) family protein | chr3:20235818-20243701 FORWARD LENGTH=1239	519	653	518	655	PF06470.11	SMC_hinge	1	2	115	135	75.8	2.9e-21	1
AT3G56090.1 | Symbols: ATFER3, FER3 | ferritin 3 | chr3:20814350-20815984 REVERSE LENGTH=259	97	240	96	241	PF00210.22	Ferritin	1	2	141	144	111	3.9e-32	1
AT3G57610.1 | Symbols: ADSS | adenylosuccinate synthase | chr3:21334519-21336603 REVERSE LENGTH=490	71	488	69	488	PF00709.19	Adenylsucc_synt	1	3	419	421	567.8	1.3e-170	1
AT3G56240.1 | Symbols: CCH | copper chaperone | chr3:20863460-20864402 REVERSE LENGTH=121	6	63	5	63	PF00403.24	HMA	1	2	62	61	58.3	6.7e-16	1
AT3G58560.1 | Symbols: | DNAse I-like superfamily protein | chr3:21650880-21653896 REVERSE LENGTH=602	71	110	63	111	PF15801.3	zf-C6H2	1	9	46	40	32.6	6.7e-08	1
AT3G58560.1 | Symbols: | DNAse I-like superfamily protein | chr3:21650880-21653896 REVERSE LENGTH=602	251	583	251	583	PF03372.21	Exo_endo_phos	1	1	113	333	55.6	4.9e-15	1
AT3G58610.1 | Symbols: | ketol-acid reductoisomerase | chr3:21671561-21674639 FORWARD LENGTH=591	120	294	116	296	PF07991.10	IlvN	1	5	161	176	109.5	1.1e-31	1
AT3G58610.1 | Symbols: | ketol-acid reductoisomerase | chr3:21671561-21674639 FORWARD LENGTH=591	303	447	302	448	PF01450.17	IlvC	2	2	143	150	121.7	2.6e-35	1
AT3G58610.1 | Symbols: | ketol-acid reductoisomerase | chr3:21671561-21674639 FORWARD LENGTH=591	460	528	457	546	PF01450.17	IlvC		18	85	69	31.2	2.1e-07	1
AT3G60750.1 | Symbols: | Transketolase | chr3:22454004-22456824 FORWARD LENGTH=741	83	414	80	414	PF00456.19	Transketolase_N	1	4	334	333	511	1.1e-153	1
AT3G60750.1 | Symbols: | Transketolase | chr3:22454004-22456824 FORWARD LENGTH=741	432	603	431	604	PF02779.22	Transket_pyr	1	4	177	178	152.5	8.3e-45	1
AT3G60750.1 | Symbols: | Transketolase | chr3:22454004-22456824 FORWARD LENGTH=741	627	733	623	733	PF02780.18	Transketolase_C	1	9	124	116	45.4	5.9e-12	1
AT3G60820.1 | Symbols: PBF1 | N-terminal nucleophile aminohydrolases (Ntn hydrolases) superfamily protein | chr3:22472038-22473809 REVERSE LENGTH=223	13	207	12	208	PF00227.24	Proteasome	1	2	189	201	123	8.9e-36	1
AT3G58570.1 | Symbols: | P-loop containing nucleoside triphosphate hydrolases superfamily protein | chr3:21657099-21660352 FORWARD LENGTH=646	170	350	170	350	PF00270.27	DEAD	1	1	176	188	170.6	2.4e-50	1
AT3G58570.1 | Symbols: | P-loop containing nucleoside triphosphate hydrolases superfamily protein | chr3:21657099-21660352 FORWARD LENGTH=646	385	500	384	500	PF00271.29	Helicase_C	1	2	111	117	101.9	2.3e-29	1
AT3G60900.1 | Symbols: FLA10 | FASCICLIN-like arabinogalactan-protein 10 | chr3:22499573-22500841 REVERSE LENGTH=422	199	329	198	329	PF02469.20	Fasciclin	1	2	128	133	67.6	1.1e-18	1
AT3G61110.1 | Symbols: ARS27A, RS27A | ribosomal protein S27 | chr3:22611710-22612632 FORWARD LENGTH=86	30	84	30	84	PF01667.15	Ribosomal_S27e	1	1	55	55	95.2	1.3e-27	1
AT3G56070.1 | Symbols: ROC2 | rotamase cyclophilin 2 | chr3:20806987-20807517 REVERSE LENGTH=176	14	169	7	170	PF00160.19	Pro_isomerase	1	8	158	166	166.4	5.2e-49	1
AT3G55620.1 | Symbols: emb1624 | Translation initiation factor IF6 | chr3:20634581-20636312 FORWARD LENGTH=245	4	203	4	204	PF01912.16	eIF-6	1	1	196	200	272	2e-81	1
AT3G55460.1 | Symbols: SCL30, At-SCL30 | SC35-like splicing factor 30 | chr3:20561024-20563502 FORWARD LENGTH=262	49	119	49	119	PF00076.20	RRM_1	1	1	70	71	67.7	5.3e-19	1
AT3G51160.1 | Symbols: MUR1, MUR_1, GMD2 | NAD(P)-binding Rossmann-fold superfamily protein | chr3:19007232-19008353 REVERSE LENGTH=373	32	347	32	347	PF16363.3	GDP_Man_Dehyd	1	1	332	334	450.8	2.9e-135	1
AT3G61440.1 | Symbols: ATCYSC1, ARATH;BSAS3;1, CYSC1 | cysteine synthase C1 | chr3:22735885-22737792 FORWARD LENGTH=368	54	339	53	341	PF00291.23	PALP	1	2	292	300	221.1	1.9e-65	1
AT3G62120.1 | Symbols: | Class II aaRS and biotin synthetases superfamily protein | chr3:23001227-23003849 REVERSE LENGTH=530	149	315	141	318	PF00587.23	tRNA-synt_2b	1	11	176	171	64.6	1e-17	1
AT3G62120.1 | Symbols: | Class II aaRS and biotin synthetases superfamily protein | chr3:23001227-23003849 REVERSE LENGTH=530	334	430	334	431	PF03129.18	HGTP_anticodon	1	1	93	97	71.6	4.2e-20	1
AT3G62120.1 | Symbols: | Class II aaRS and biotin synthetases superfamily protein | chr3:23001227-23003849 REVERSE LENGTH=530	457	530	457	530	PF09180.9	ProRS-C_1	1	1	69	74	93.1	8.3e-27	1
AT3G62830.1 | Symbols: UXS2, ATUXS2, AUD1 | NAD(P)-binding Rossmann-fold superfamily protein | chr3:23232539-23235353 FORWARD LENGTH=445	123	415	122	417	PF16363.3	GDP_Man_Dehyd	1	2	330	335	204.1	3.2e-60	1
AT3G62360.1 | Symbols: | Carbohydrate-binding-like fold | chr3:23073020-23080455 REVERSE LENGTH=1227	976	1030	974	1051	PF13620.4	CarboxypepD_reg	1	4	57	55	31.4	1.5e-07	1
AT3G63460.1 | Symbols: | transducin family protein / WD-40 repeat family protein | chr3:23431009-23437241 REVERSE LENGTH=1104	114	151	112	151	PF00400.30	WD40	1	3	38	38	19	0.0018	1
AT3G63460.1 | Symbols: | transducin family protein / WD-40 repeat family protein | chr3:23431009-23437241 REVERSE LENGTH=1104	568	763	568	767	PF12931.5	Sec16_C	1	1	235	236	31	1.7e-07	1
AT3G63460.1 | Symbols: | transducin family protein / WD-40 repeat family protein | chr3:23431009-23437241 REVERSE LENGTH=1104	964	1101	954	1103	PF07304.9	SRA1	1	3	134	139	24.4	1.8e-05	1
AT4G00060.1 | Symbols: MEE44 | Nucleotidyltransferase family protein | chr4:21437-27996 FORWARD LENGTH=1481	1137	1187	1137	1231	PF01909.21	NTP_transf_2	1	1	48	51	27.9	2e-06	1
AT4G00660.2 | Symbols: RH8, ATRH8 | RNAhelicase-like 8 | chr4:274638-277438 FORWARD LENGTH=505	156	320	155	321	PF00270.27	DEAD	1	2	175	174	159.1	8.1e-47	1
AT4G00660.2 | Symbols: RH8, ATRH8 | RNAhelicase-like 8 | chr4:274638-277438 FORWARD LENGTH=505	355	463	354	463	PF00271.29	Helicase_C	1	2	111	113	97.2	6.5e-28	1
AT4G00830.1 | Symbols: | RNA-binding (RRM/RBD/RNP motifs) family protein | chr4:352782-354965 FORWARD LENGTH=495	118	188	118	188	PF00076.20	RRM_1	3	1	70	71	77.3	5.2e-22	1
AT4G00830.1 | Symbols: | RNA-binding (RRM/RBD/RNP motifs) family protein | chr4:352782-354965 FORWARD LENGTH=495	198	259	198	268	PF00076.20	RRM_1		1	59	62	38.1	9e-10	1
AT4G00830.1 | Symbols: | RNA-binding (RRM/RBD/RNP motifs) family protein | chr4:352782-354965 FORWARD LENGTH=495	294	361	294	362	PF00076.20	RRM_1		1	69	69	52.7	2.5e-14	1
AT4G00860.1 | Symbols: ATOZI1, AT0ZI1 | Protein of unknown function (DUF1138) | chr4:359548-359868 REVERSE LENGTH=80	5	76	4	76	PF06592.11	DUF1138	1	2	73	72	140.6	1.1e-41	1
AT4G02520.1 | Symbols: ATGSTF2, ATPM24.1, ATPM24, GST2, GSTF2 | glutathione S-transferase PHI 2 | chr4:1110673-1111531 REVERSE LENGTH=212	3	76	2	77	PF02798.18	GST_N	1	2	75	74	80.4	8.1e-23	1
AT4G02520.1 | Symbols: ATGSTF2, ATPM24.1, ATPM24, GST2, GSTF2 | glutathione S-transferase PHI 2 | chr4:1110673-1111531 REVERSE LENGTH=212	112	206	111	206	PF00043.23	GST_C	1	2	93	95	55.1	5.9e-15	1
AT4G02570.1 | Symbols: ATCUL1, CUL1, AXR6 | cullin 1 | chr4:1129315-1133435 FORWARD LENGTH=738	25	641	12	641	PF00888.20	Cullin	1	7	605	623	605.9	8e-182	1
AT4G02570.1 | Symbols: ATCUL1, CUL1, AXR6 | cullin 1 | chr4:1129315-1133435 FORWARD LENGTH=738	668	730	668	730	PF10557.7	Cullin_Nedd8	1	1	63	63	91.3	2.6e-26	1
AT4G02840.2 | Symbols: | Small nuclear ribonucleoprotein family protein | chr4:1264726-1266253 FORWARD LENGTH=126	5	79	5	80	PF01423.20	LSM	1	1	66	76	48.5	4.6e-13	1
AT4G04210.1 | Symbols: PUX4 | plant UBX domain containing protein 4 | chr4:2030391-2031670 FORWARD LENGTH=303	114	187	114	187	PF08059.11	SEP	1	1	76	76	89.4	1.5e-25	1
AT4G04210.1 | Symbols: PUX4 | plant UBX domain containing protein 4 | chr4:2030391-2031670 FORWARD LENGTH=303	226	302	224	303	PF00789.18	UBX	1	3	80	79	72.9	1.7e-20	1
AT4G04940.1 | Symbols: | transducin family protein / WD-40 repeat family protein | chr4:2511212-2517052 REVERSE LENGTH=910	190	276	187	279	PF12894.5	ANAPC4_WD40	1	4	89	88	23.1	6.2e-05	1
AT4G04940.1 | Symbols: | transducin family protein / WD-40 repeat family protein | chr4:2511212-2517052 REVERSE LENGTH=910	549	585	547	585	PF00400.30	WD40	1	3	38	37	43.3	3.6e-11	1
AT4G04940.1 | Symbols: | transducin family protein / WD-40 repeat family protein | chr4:2511212-2517052 REVERSE LENGTH=910	671	906	665	906	PF04192.10	Utp21	1	7	232	240	206.7	3.2e-61	1
AT4G04950.1 | Symbols: | thioredoxin family protein | chr4:2517882-2519924 REVERSE LENGTH=488	16	102	5	105	PF00085.18	Thioredoxin	1	13	101	89	55.8	3.1e-15	1
AT4G04950.1 | Symbols: | thioredoxin family protein | chr4:2517882-2519924 REVERSE LENGTH=488	166	229	166	230	PF00462.22	Glutaredoxin	3	1	59	64	62.5	2.9e-17	1
AT4G04950.1 | Symbols: | thioredoxin family protein | chr4:2517882-2519924 REVERSE LENGTH=488	296	359	296	360	PF00462.22	Glutaredoxin		1	59	64	52.4	4.1e-14	1
AT4G04950.1 | Symbols: | thioredoxin family protein | chr4:2517882-2519924 REVERSE LENGTH=488	403	467	403	467	PF00462.22	Glutaredoxin		1	60	65	58.3	6.1e-16	1
AT4G07410.1 | Symbols: | Transducin family protein / WD-40 repeat family protein | chr4:4201465-4205136 REVERSE LENGTH=815	203	226	196	226	PF00400.30	WD40	1	15	38	24	16.2	0.013	1
AT4G08950.1 | Symbols: EXO | Phosphate-responsive 1 family protein | chr4:5740378-5741322 FORWARD LENGTH=314	35	313	35	313	PF04674.10	Phi_1	1	1	275	281	413.5	3.2e-124	1
AT4G09000.2 | Symbols: GRF1, GF14 CHI | general regulatory factor 1 | chr4:5775387-5777157 FORWARD LENGTH=318	16	240	16	240	PF00244.18	14-3-3	1	1	222	225	348.5	1.2e-104	1
AT4G11010.1 | Symbols: NDPK3 | nucleoside diphosphate kinase 3 | chr4:6732780-6734298 REVERSE LENGTH=238	89	222	89	223	PF00334.17	NDK	1	1	134	134	177.2	1.3e-52	1
AT4G09320.1 | Symbols: NDPK1 | Nucleoside diphosphate kinase family protein | chr4:5923424-5924366 FORWARD LENGTH=169	22	153	22	156	PF00334.17	NDK	1	1	132	132	180.1	1.7e-53	1
AT4G11600.1 | Symbols: ATGPX6, PHGPX, LSC803, GPX6 | glutathione peroxidase 6 | chr4:7010021-7011330 REVERSE LENGTH=232	73	181	73	181	PF00255.17	GSHPx	1	1	108	109	145.9	2.5e-43	1
AT4G11270.1 | Symbols: | Transducin/WD40 repeat-like superfamily protein | chr4:6854461-6859490 FORWARD LENGTH=1446	524	565	519	565	PF00400.30	WD40	1	7	38	42	22.7	0.00011	1
AT3G45970.1 | Symbols: ATEXLA1, EXPL1, ATEXPL1, ATHEXP BETA 2.1, EXLA1 | expansin-like A1 | chr3:16896238-16897189 FORWARD LENGTH=265	59	137	58	137	PF03330.16	DPBB_1	1	2	83	91	51.5	8.4e-14	1
AT3G45970.1 | Symbols: ATEXLA1, EXPL1, ATEXPL1, ATHEXP BETA 2.1, EXLA1 | expansin-like A1 | chr3:16896238-16897189 FORWARD LENGTH=265	150	233	149	233	PF01357.19	Pollen_allerg_1	1	2	80	85	60.1	1.4e-16	1
AT4G13780.1 | Symbols: | methionine--tRNA ligase, putative / methionyl-tRNA synthetase, putative / MetRS, putative | chr4:7993366-7998433 REVERSE LENGTH=797	19	413	19	413	PF09334.9	tRNA-synt_1g	1	1	391	401	506.4	4.1e-152	1
AT4G13780.1 | Symbols: | methionine--tRNA ligase, putative / methionyl-tRNA synthetase, putative / MetRS, putative | chr4:7993366-7998433 REVERSE LENGTH=797	641	735	641	736	PF01588.18	tRNA_bind	1	1	95	95	109.2	7.3e-32	1
AT4G14342.1 | Symbols: | Splicing factor 3B subunit 5/RDS3 complex subunit 10 | chr4:8253789-8255405 REVERSE LENGTH=87	5	82	5	82	PF07189.9	SF3b10	1	1	78	78	128	9.5e-38	1
AT4G16280.2 | Symbols: FCA | RNA binding;abscisic acid binding | chr4:9207164-9214412 REVERSE LENGTH=747	122	184	122	191	PF00076.20	RRM_1	2	1	62	63	62.2	2.8e-17	1
AT4G16280.2 | Symbols: FCA | RNA binding;abscisic acid binding | chr4:9207164-9214412 REVERSE LENGTH=747	213	278	213	282	PF00076.20	RRM_1		1	65	66	61.4	4.9e-17	1
AT4G16280.2 | Symbols: FCA | RNA binding;abscisic acid binding | chr4:9207164-9214412 REVERSE LENGTH=747	597	622	594	622	PF00397.24	WW	1	5	31	27	30.5	2.4e-07	1
AT4G16830.1 | Symbols: | Hyaluronan / mRNA binding family | chr4:9470621-9472308 FORWARD LENGTH=355	1	71	1	72	PF09598.8	Stm1_N	1	1	64	74	64.8	8.9e-18	1
AT4G16830.1 | Symbols: | Hyaluronan / mRNA binding family | chr4:9470621-9472308 FORWARD LENGTH=355	147	252	147	252	PF04774.13	HABP4_PAI-RBP1	1	1	117	119	95.7	2.8e-27	1
AT4G17140.3 | Symbols: | pleckstrin homology (PH) domain-containing protein | chr4:9613617-9636618 REVERSE LENGTH=4219	2	108	2	118	PF12624.5	Chorein_N	1	1	107	107	110.3	5.1e-32	1
AT4G17140.3 | Symbols: | pleckstrin homology (PH) domain-containing protein | chr4:9613617-9636618 REVERSE LENGTH=4219	133	374	133	375	PF16908.3	VPS13	1	1	232	246	220.1	3.3e-65	1
AT4G17140.3 | Symbols: | pleckstrin homology (PH) domain-containing protein | chr4:9613617-9636618 REVERSE LENGTH=4219	561	782	558	784	PF16910.3	VPS13_mid_rpt	1	4	231	241	130.9	4.5e-38	1
AT4G17140.3 | Symbols: | pleckstrin homology (PH) domain-containing protein | chr4:9613617-9636618 REVERSE LENGTH=4219	803	908	801	909	PF00169.27	PH	1	3	104	111	36.9	3.7e-09	1
AT4G17140.3 | Symbols: | pleckstrin homology (PH) domain-containing protein | chr4:9613617-9636618 REVERSE LENGTH=4219	1994	2147	1983	2152	PF06101.9	DUF946	2	36	185	160	38.7	3.5e-10	1
AT4G17140.3 | Symbols: | pleckstrin homology (PH) domain-containing protein | chr4:9613617-9636618 REVERSE LENGTH=4219	2218	2365	2210	2374	PF06101.9	DUF946		34	185	155	37.2	9.7e-10	1
AT4G17140.3 | Symbols: | pleckstrin homology (PH) domain-containing protein | chr4:9613617-9636618 REVERSE LENGTH=4219	3245	3352	3231	3353	PF06650.10	SHR-BD	1	157	270	116	22.3	6.6e-05	1
AT4G17520.1 | Symbols: | Hyaluronan / mRNA binding family | chr4:9771496-9773313 FORWARD LENGTH=360	1	63	1	67	PF09598.8	Stm1_N	1	1	64	65	71.8	5.8e-20	1
AT4G17520.1 | Symbols: | Hyaluronan / mRNA binding family | chr4:9771496-9773313 FORWARD LENGTH=360	136	242	136	242	PF04774.13	HABP4_PAI-RBP1	1	1	117	119	93.6	1.3e-26	1
AT4G19610.1 | Symbols: | nucleotide binding;nucleic acid binding;RNA binding | chr4:10677482-10681623 FORWARD LENGTH=816	4	69	4	72	PF00076.20	RRM_1	5	1	66	66	56.3	1.9e-15	1
AT4G19610.1 | Symbols: | nucleotide binding;nucleic acid binding;RNA binding | chr4:10677482-10681623 FORWARD LENGTH=816	296	365	296	366	PF00076.20	RRM_1		1	69	70	64.9	3.8e-18	1
AT4G19610.1 | Symbols: | nucleotide binding;nucleic acid binding;RNA binding | chr4:10677482-10681623 FORWARD LENGTH=816	490	552	490	554	PF00076.20	RRM_1		1	68	68	30.6	1.9e-07	1
AT4G19610.1 | Symbols: | nucleotide binding;nucleic acid binding;RNA binding | chr4:10677482-10681623 FORWARD LENGTH=816	606	678	604	679	PF00076.20	RRM_1		3	69	73	43.2	2.3e-11	1
AT4G19610.1 | Symbols: | nucleotide binding;nucleic acid binding;RNA binding | chr4:10677482-10681623 FORWARD LENGTH=816	705	772	704	773	PF00076.20	RRM_1		2	69	68	60.4	9.6e-17	1
AT4G20740.1 | Symbols: | Pentatricopeptide repeat (PPR-like) superfamily protein | chr4:11126151-11128334 FORWARD LENGTH=727	226	275	226	275	PF13041.4	PPR_2	3	1	50	50	33	4.6e-08	1
AT4G20740.1 | Symbols: | Pentatricopeptide repeat (PPR-like) superfamily protein | chr4:11126151-11128334 FORWARD LENGTH=727	296	345	296	345	PF13041.4	PPR_2		1	50	50	42.7	4.3e-11	1
AT4G20740.1 | Symbols: | Pentatricopeptide repeat (PPR-like) superfamily protein | chr4:11126151-11128334 FORWARD LENGTH=727	370	398	369	399	PF01535.18	PPR	1	2	30	29	11.5	0.26	1
AT4G20740.1 | Symbols: | Pentatricopeptide repeat (PPR-like) superfamily protein | chr4:11126151-11128334 FORWARD LENGTH=727	402	426	397	428	PF12854.5	PPR_1	1	6	30	25	24.5	1.4e-05	1
AT4G20740.1 | Symbols: | Pentatricopeptide repeat (PPR-like) superfamily protein | chr4:11126151-11128334 FORWARD LENGTH=727	507	550	505	552	PF13041.4	PPR_2		3	46	44	39.2	5.3e-10	1
AT4G20740.1 | Symbols: | Pentatricopeptide repeat (PPR-like) superfamily protein | chr4:11126151-11128334 FORWARD LENGTH=727	634	679	634	681	PF13812.4	PPR_3	1	1	46	46	18.9	0.0011	1
AT4G20830.1 | Symbols: | FAD-binding Berberine family protein | chr4:11155486-11157577 FORWARD LENGTH=570	87	223	87	225	PF01565.21	FAD_binding_4	1	1	136	138	85.4	2.6e-24	1
AT4G20830.1 | Symbols: | FAD-binding Berberine family protein | chr4:11155486-11157577 FORWARD LENGTH=570	477	534	477	534	PF08031.10	BBE	1	1	47	58	76.2	1.4e-21	1
AT4G19880.2 | Symbols: | Glutathione S-transferase family protein | chr4:10784691-10786376 REVERSE LENGTH=382	79	186	79	186	PF13409.4	GST_N_2	1	1	70	108	72.4	2.5e-20	1
AT4G19880.2 | Symbols: | Glutathione S-transferase family protein | chr4:10784691-10786376 REVERSE LENGTH=382	234	302	231	306	PF13410.4	GST_C_2	1	4	66	70	39.4	3.8e-10	1
AT4G20980.1 | Symbols: | Eukaryotic translation initiation factor 3 subunit 7 (eIF-3) | chr4:11216997-11218772 FORWARD LENGTH=591	8	540	6	540	PF05091.10	eIF-3_zeta	1	3	520	558	642.5	5.8e-193	1
AT4G21150.1 | Symbols: HAP6 | ribophorin II (RPN2) family protein | chr4:11278646-11283599 FORWARD LENGTH=691	10	683	8	684	PF05817.12	Ribophorin_II	1	3	630	682	646.8	3.4e-194	1
AT4G21600.1 | Symbols: ENDO5 | endonuclease 5 | chr4:11485319-11487235 FORWARD LENGTH=296	21	288	21	288	PF02265.14	S1-P1_nuclease		1	252	271	267.6	1.2e-79	1
AT4G22220.1 | Symbols: ISU1, ATISU1 | SufE/NifU family protein | chr4:11759444-11760881 REVERSE LENGTH=167	28	153	28	155	PF01592.14	NifU_N	1	1	127	127	197.3	7.6e-59	1
AT4G24620.1 | Symbols: PGI1, PGI | phosphoglucose isomerase 1 | chr4:12708972-12712610 REVERSE LENGTH=613	117	443	94	450	PF00342.17	PGI	2	27	357	338	173.8	4.5e-51	1
AT4G24620.1 | Symbols: PGI1, PGI | phosphoglucose isomerase 1 | chr4:12708972-12712610 REVERSE LENGTH=613	475	534	467	547	PF00342.17	PGI		408	467	60	36.7	1.7e-09	1
AT4G24770.1 | Symbols: RBP31, ATRBP31, CP31, ATRBP33 | 31-kDa RNA binding protein | chr4:12766223-12767952 REVERSE LENGTH=329	152	221	152	222	PF00076.20	RRM_1	2	1	69	70	68.1	3.9e-19	1
AT4G24770.1 | Symbols: RBP31, ATRBP31, CP31, ATRBP33 | 31-kDa RNA binding protein | chr4:12766223-12767952 REVERSE LENGTH=329	246	316	246	316	PF00076.20	RRM_1		1	70	71	78.7	1.9e-22	1
AT4G24830.1 | Symbols: | arginosuccinate synthase family | chr4:12793085-12795857 REVERSE LENGTH=494	100	486	100	488	PF00764.17	Arginosuc_synth	1	1	386	387	530.9	2e-159	1
AT4G25730.1 | Symbols: | FtsJ-like methyltransferase family protein | chr4:13102906-13106718 REVERSE LENGTH=821	22	200	22	201	PF01728.17	FtsJ	1	1	176	179	166.3	6.6e-49	1
AT4G25730.1 | Symbols: | FtsJ-like methyltransferase family protein | chr4:13102906-13106718 REVERSE LENGTH=821	235	383	234	383	PF11861.6	DUF3381	1	2	160	161	142	1.3e-41	1
AT4G25730.1 | Symbols: | FtsJ-like methyltransferase family protein | chr4:13102906-13106718 REVERSE LENGTH=821	598	787	597	790	PF07780.10	Spb1_C	1	2	205	204	190.3	2.9e-56	1
AT4G25890.1 | Symbols: | 60S acidic ribosomal protein family | chr4:13159627-13160393 REVERSE LENGTH=119	75	118	41	118	PF00428.17	Ribosomal_60s	1	45	88	45	38.8	9.1e-10	1
AT4G26110.1 | Symbols: NAP1;1, ATNAP1;1 | nucleosome assembly protein1;1 | chr4:13232712-13235502 FORWARD LENGTH=372	53	298	53	298	PF00956.16	NAP	1	1	268	269	288.2	4.5e-86	1
AT4G26650.1 | Symbols: | RNA-binding (RRM/RBD/RNP motifs) family protein | chr4:13445552-13447592 FORWARD LENGTH=455	17	84	17	85	PF00076.20	RRM_1	2	1	69	70	55.8	2.7e-15	1
AT4G26650.1 | Symbols: | RNA-binding (RRM/RBD/RNP motifs) family protein | chr4:13445552-13447592 FORWARD LENGTH=455	124	181	124	196	PF00076.20	RRM_1		1	57	58	58	5.4e-16	1
AT4G26780.1 | Symbols: AR192 | Co-chaperone GrpE family protein | chr4:13485066-13486560 REVERSE LENGTH=327	147	313	73	314	PF01025.17	GrpE	1	13	165	171	166	5.1e-49	1
AT4G27000.1 | Symbols: ATRBP45C | RNA-binding (RRM/RBD/RNP motifs) family protein | chr4:13554983-13557763 REVERSE LENGTH=415	82	148	82	151	PF00076.20	RRM_1	3	1	66	67	35.8	4.6e-09	1
AT4G27000.1 | Symbols: ATRBP45C | RNA-binding (RRM/RBD/RNP motifs) family protein | chr4:13554983-13557763 REVERSE LENGTH=415	175	245	175	246	PF00076.20	RRM_1		1	69	71	63.5	1.1e-17	1
AT4G27000.1 | Symbols: ATRBP45C | RNA-binding (RRM/RBD/RNP motifs) family protein | chr4:13554983-13557763 REVERSE LENGTH=415	280	344	280	344	PF00076.20	RRM_1		1	70	70	57	1.1e-15	1
AT4G27070.1 | Symbols: TSB2 | tryptophan synthase beta-subunit 2 | chr4:13586564-13588619 FORWARD LENGTH=475	130	460	127	460	PF00291.23	PALP	1	4	294	338	163.5	6.5e-48	1
AT4G27090.1 | Symbols: | Ribosomal protein L14 | chr4:13594104-13595187 REVERSE LENGTH=134	45	117	44	118	PF01929.15	Ribosomal_L14e	1	2	74	73	94.8	3e-27	1
AT4G27450.1 | Symbols: | Aluminium induced protein with YGL and LRDR motifs | chr4:13727665-13728683 REVERSE LENGTH=250	2	230	2	230	PF12481.6	DUF3700	1	1	228	230	368.8	8e-111	1
AT4G28910.2 | Symbols: NINJA | novel interactor of JAZ | chr4:14264330-14265680 REVERSE LENGTH=425	358	407	352	416	PF16135.3	Jas	1	9	65	61	28.6	1.1e-06	1
AT4G28510.1 | Symbols: ATPHB1, PHB1 | prohibitin 1 | chr4:14084970-14086372 REVERSE LENGTH=288	38	213	37	227	PF01145.23	Band_7	1	2	177	182	92.6	2.5e-26	1
AT4G29480.1 | Symbols: | Mitochondrial ATP synthase subunit G protein | chr4:14486265-14487257 REVERSE LENGTH=122	15	120	14	121	PF04718.13	ATP-synt_G	1	2	99	110	76.3	2.3e-21	1
AT4G29680.1 | Symbols: | Alkaline-phosphatase-like family protein | chr4:14538067-14539557 REVERSE LENGTH=496	109	435	109	435	PF01663.20	Phosphodiest	1	1	357	360	328.9	5e-98	1
AT4G29690.1 | Symbols: | Alkaline-phosphatase-like family protein | chr4:14541084-14542457 REVERSE LENGTH=457	57	390	57	390	PF01663.20	Phosphodiest	1	1	357	360	326.3	2.9e-97	1
AT4G29720.1 | Symbols: ATPAO5, PAO5 | polyamine oxidase 5 | chr4:14553456-14555057 REVERSE LENGTH=533	14	526	14	526	PF01593.22	Amino_oxidase	1	1	451	522	361.1	1e-107	1
AT4G29840.1 | Symbols: MTO2, TS | Pyridoxal-5'-phosphate-dependent enzyme family protein | chr4:14599434-14601014 REVERSE LENGTH=526	166	472	164	473	PF00291.23	PALP	1	3	293	311	170.6	4.4e-50	1
AT4G30330.1 | Symbols: | Small nuclear ribonucleoprotein family protein | chr4:14836773-14837919 REVERSE LENGTH=88	20	83	19	85	PF01423.20	LSM	1	2	65	64	62.8	1.6e-17	1
AT4G29130.1 | Symbols: ATHXK1, GIN2, HXK1 | hexokinase 1 | chr4:14352338-14354865 REVERSE LENGTH=496	42	240	40	240	PF00349.19	Hexokinase_1	1	3	197	200	216.2	3.9e-64	1
AT4G29130.1 | Symbols: ATHXK1, GIN2, HXK1 | hexokinase 1 | chr4:14352338-14354865 REVERSE LENGTH=496	247	487	246	488	PF03727.14	Hexokinase_2	1	2	238	246	260.4	1.3e-77	1
AT4G31180.1 | Symbols: | Class II aminoacyl-tRNA and biotin synthetases superfamily protein | chr4:15156696-15159362 FORWARD LENGTH=558	110	195	110	197	PF01336.23	tRNA_anti-codon	1	1	74	87	32.5	5.6e-08	1
AT4G31180.1 | Symbols: | Class II aminoacyl-tRNA and biotin synthetases superfamily protein | chr4:15156696-15159362 FORWARD LENGTH=558	233	552	232	553	PF00152.18	tRNA-synt_2	1	2	313	326	237.9	1.3e-70	1
AT4G34180.1 | Symbols: | Cyclase family protein | chr4:16370060-16371383 REVERSE LENGTH=255	41	197	41	199	PF04199.11	Cyclase	1	1	134	170	76.8	1.6e-21	1
AT4G34260.1 | Symbols: FUC95A | 1,2-alpha-L-fucosidases | chr4:16398130-16401591 FORWARD LENGTH=843	54	309	54	310	PF14498.4	Glyco_hyd_65N_2	1	1	236	258	235	9.2e-70	1
AT4G35090.1 | Symbols: CAT2 | catalase 2 | chr4:16700937-16703215 REVERSE LENGTH=492	18	398	18	399	PF00199.17	Catalase	1	1	381	382	580.5	1.4e-174	1
AT4G35090.1 | Symbols: CAT2 | catalase 2 | chr4:16700937-16703215 REVERSE LENGTH=492	423	486	422	486	PF06628.10	Catalase-rel	1	3	65	65	55	6.1e-15	1
AT4G35100.1 | Symbols: PIP3, PIP3A, PIP2;7, SIMIP | plasma membrane intrinsic protein 3 | chr4:16708672-16709958 FORWARD LENGTH=280	30	258	30	259	PF00230.18	MIP	1	1	226	232	272	3.8e-81	1
AT4G35785.5 | Symbols: | RNA-binding (RRM/RBD/RNP motifs) family protein | chr4:16953404-16955127 REVERSE LENGTH=244	88	157	88	158	PF00076.20	RRM_1	1	1	69	70	56.6	1.5e-15	1
AT4G35630.1 | Symbols: PSAT | phosphoserine aminotransferase | chr4:16904205-16905497 FORWARD LENGTH=430	73	418	73	418	PF00266.17	Aminotran_5	1	1	371	380	177.2	4.2e-52	1
AT4G35830.1 | Symbols: ACO1 | aconitase 1 | chr4:16973007-16977949 REVERSE LENGTH=898	65	568	65	568	PF00330.18	Aconitase	1	1	462	506	612.3	5.4e-184	1
AT4G35830.1 | Symbols: ACO1 | aconitase 1 | chr4:16973007-16977949 REVERSE LENGTH=898	697	825	696	826	PF00694.17	Aconitase_C	1	2	130	129	160.2	2.7e-47	1
AT4G34050.1 | Symbols: CCoAOMT1 | S-adenosyl-L-methionine-dependent methyltransferases superfamily protein | chr4:16310844-16311973 FORWARD LENGTH=259	47	258	46	258	PF01596.15	Methyltransf_3	1	2	212	213	343.2	3.5e-103	1
AT4G35890.1 | Symbols: | winged-helix DNA-binding transcription factor family protein | chr4:16997433-17000410 FORWARD LENGTH=523	374	428	373	429	PF05383.15	La	1	2	58	57	70.5	8.3e-20	1
AT4G36020.1 | Symbols: CSDP1 | cold shock domain protein 1 | chr4:17043443-17044342 REVERSE LENGTH=299	12	76	11	77	PF00313.20	CSD	1	2	65	65	87.9	2.7e-25	1
AT4G36020.1 | Symbols: CSDP1 | cold shock domain protein 1 | chr4:17043443-17044342 REVERSE LENGTH=299	101	115	100	116	PF00098.21	zf-CCHC	7	2	16	15	29.2	5.6e-07	1
AT4G36020.1 | Symbols: CSDP1 | cold shock domain protein 1 | chr4:17043443-17044342 REVERSE LENGTH=299	133	149	132	149	PF00098.21	zf-CCHC		2	18	17	33.1	3.3e-08	1
AT4G36020.1 | Symbols: CSDP1 | cold shock domain protein 1 | chr4:17043443-17044342 REVERSE LENGTH=299	165	181	164	181	PF00098.21	zf-CCHC		2	18	17	30.6	2.1e-07	1
AT4G36020.1 | Symbols: CSDP1 | cold shock domain protein 1 | chr4:17043443-17044342 REVERSE LENGTH=299	199	215	198	215	PF00098.21	zf-CCHC		2	18	17	31.7	9.3e-08	1
AT4G36020.1 | Symbols: CSDP1 | cold shock domain protein 1 | chr4:17043443-17044342 REVERSE LENGTH=299	230	246	230	247	PF00098.21	zf-CCHC		1	17	17	29	6.6e-07	1
AT4G36020.1 | Symbols: CSDP1 | cold shock domain protein 1 | chr4:17043443-17044342 REVERSE LENGTH=299	253	270	253	270	PF00098.21	zf-CCHC		1	18	18	26.6	3.8e-06	1
AT4G36020.1 | Symbols: CSDP1 | cold shock domain protein 1 | chr4:17043443-17044342 REVERSE LENGTH=299	281	296	280	297	PF00098.21	zf-CCHC		2	17	16	31.1	1.5e-07	1
AT4G35850.1 | Symbols: | Pentatricopeptide repeat (PPR) superfamily protein | chr4:16983638-16986681 FORWARD LENGTH=444	109	157	109	158	PF13041.4	PPR_2	1	1	49	49	46.3	3.1e-12	1
AT4G33680.1 | Symbols: AGD2 | Pyridoxal phosphate (PLP)-dependent transferases superfamily protein | chr4:16171847-16174630 REVERSE LENGTH=461	92	456	91	456	PF00155.19	Aminotran_1_2	1	2	363	384	122	2.9e-35	1
AT4G28360.1 | Symbols: | Ribosomal protein L22p/L17e family protein | chr4:14029294-14030926 REVERSE LENGTH=271	112	211	111	212	PF00237.17	Ribosomal_L22	1	2	101	100	94	5.8e-27	1
AT4G38600.1 | Symbols: KAK, UPL3 | HEAT repeat ;HECT-domain (ubiquitin-transferase) | chr4:18041503-18049292 REVERSE LENGTH=1888	1518	1888	1518	1888	PF00632.23	HECT	1	1	307	378	279.2	4.3e-83	1
AT4G38630.1 | Symbols: RPN10, MCB1, ATMCB1, MBP1 | regulatory particle non-ATPase 10 | chr4:18057357-18059459 REVERSE LENGTH=386	6	115	6	117	PF13519.4	VWA_2	1	1	105	111	94.1	6.9e-27	1
AT4G38630.1 | Symbols: RPN10, MCB1, ATMCB1, MBP1 | regulatory particle non-ATPase 10 | chr4:18057357-18059459 REVERSE LENGTH=386	223	236	223	236	PF02809.18	UIM	2	3	16	14	10.2	0.51	1
AT4G38630.1 | Symbols: RPN10, MCB1, ATMCB1, MBP1 | regulatory particle non-ATPase 10 | chr4:18057357-18059459 REVERSE LENGTH=386	305	319	305	320	PF02809.18	UIM		1	15	15	19.7	0.00048	1
AT4G38740.1 | Symbols: ROC1 | rotamase CYP 1 | chr4:18083620-18084138 REVERSE LENGTH=172	8	169	7	170	PF00160.19	Pro_isomerase	1	2	158	172	171.2	1.8e-50	1
AT4G38780.1 | Symbols: | Pre-mRNA-processing-splicing factor | chr4:18101438-18111029 REVERSE LENGTH=2332	66	204	63	204	PF08082.9	PRO8NT	1	14	152	139	251.7	2.1e-75	1
AT4G38780.1 | Symbols: | Pre-mRNA-processing-splicing factor | chr4:18101438-18111029 REVERSE LENGTH=2332	394	799	393	799	PF08083.9	PROCN	1	2	407	406	777	3.1e-234	1
AT4G38780.1 | Symbols: | Pre-mRNA-processing-splicing factor | chr4:18101438-18111029 REVERSE LENGTH=2332	984	1074	984	1075	PF10598.7	RRM_4	1	1	91	91	145.7	3.5e-43	1
AT4G38780.1 | Symbols: | Pre-mRNA-processing-splicing factor | chr4:18101438-18111029 REVERSE LENGTH=2332	1210	1342	1209	1342	PF10597.7	U5_2-snRNA_bdg	1	2	134	133	240	5.8e-72	1
AT4G38780.1 | Symbols: | Pre-mRNA-processing-splicing factor | chr4:18101438-18111029 REVERSE LENGTH=2332	1441	1599	1441	1599	PF10596.7	U6-snRNA_bdg	1	1	159	159	306.2	3.8e-92	1
AT4G38780.1 | Symbols: | Pre-mRNA-processing-splicing factor | chr4:18101438-18111029 REVERSE LENGTH=2332	1759	1988	1759	1988	PF12134.6	PRP8_domainIV	1	1	230	230	422.5	3.6e-127	1
AT4G38780.1 | Symbols: | Pre-mRNA-processing-splicing factor | chr4:18101438-18111029 REVERSE LENGTH=2332	2100	2197	2098	2203	PF01398.19	JAB	1	3	111	111	29.4	5.6e-07	1
AT4G38780.1 | Symbols: | Pre-mRNA-processing-splicing factor | chr4:18101438-18111029 REVERSE LENGTH=2332	2211	2329	2211	2330	PF08084.9	PROCT	1	1	121	121	168.8	3.7e-50	1
AT4G39260.1 | Symbols: CCR1, ATGRP8, GR-RBP8, GRP8 | cold, circadian rhythm, and RNA binding 1 | chr4:18274166-18274958 REVERSE LENGTH=169	9	77	8	78	PF00076.20	RRM_1	1	2	69	69	81.4	2.8e-23	1
AT4G39730.1 | Symbols: | Lipase/lipooxygenase, PLAT/LH2 family protein | chr4:18432950-18433581 FORWARD LENGTH=181	31	154	31	156	PF01477.21	PLAT	1	1	115	124	73.2	2.3e-20	1
AT4G39980.1 | Symbols: DHS1 | 3-deoxy-D-arabino-heptulosonate 7-phosphate synthase 1 | chr4:18539654-18541832 FORWARD LENGTH=525	75	511	75	511	PF01474.14	DAHP_synth_2	1	1	437	438	658.7	2.8e-198	1
AT5G01500.1 | Symbols: TAAC | thylakoid ATP/ADP carrier | chr5:199017-201329 FORWARD LENGTH=415	118	208	114	210	PF00153.25	Mito_carr	3	8	95	91	85.6	1.5e-24	1
AT5G01500.1 | Symbols: TAAC | thylakoid ATP/ADP carrier | chr5:199017-201329 FORWARD LENGTH=415	212	299	211	301	PF00153.25	Mito_carr		2	95	94	68	4.5e-19	1
AT5G01500.1 | Symbols: TAAC | thylakoid ATP/ADP carrier | chr5:199017-201329 FORWARD LENGTH=415	304	389	301	392	PF00153.25	Mito_carr		4	94	91	71.1	4.9e-20	1
AT5G01750.2 | Symbols: | Protein of unknown function (DUF567) | chr5:290034-291109 FORWARD LENGTH=217	26	206	25	206	PF04525.10	LOR	1	2	187	187	231.3	6e-69	1
AT4G20850.1 | Symbols: TPP2 | tripeptidyl peptidase ii | chr4:11160935-11169889 REVERSE LENGTH=1380	136	601	136	615	PF00082.20	Peptidase_S8	1	1	287	482	272.5	3.8e-81	1
AT4G20850.1 | Symbols: TPP2 | tripeptidyl peptidase ii | chr4:11160935-11169889 REVERSE LENGTH=1380	898	1080	897	1082	PF12580.6	TPPII	1	2	188	188	207.4	1.2e-61	1
AT5G02530.1 | Symbols: | RNA-binding (RRM/RBD/RNP motifs) family protein | chr5:564332-565776 REVERSE LENGTH=292	110	178	110	179	PF00076.20	RRM_1	1	1	69	69	52.1	3.7e-14	1
AT5G02530.1 | Symbols: | RNA-binding (RRM/RBD/RNP motifs) family protein | chr5:564332-565776 REVERSE LENGTH=292	233	286	229	292	PF13865.4	FoP_duplication	1	5	61	57	27.6	2.9e-06	1
AT4G12080.1 | Symbols: AHL1, ATAHL1 | AT-hook motif nuclear-localized protein 1 | chr4:7239466-7241246 FORWARD LENGTH=356	171	286	171	287	PF03479.13	DUF296	1	1	98	121	103.8	5.1e-30	1
AT5G02960.1 | Symbols: | Ribosomal protein S12/S23 family protein | chr5:693280-694396 REVERSE LENGTH=142	9	141	8	141	PF00164.23	Ribosom_S12_S23	1	2	135	134	198.1	3.7e-59	1
AT5G03100.1 | Symbols: | F-box/RNI-like superfamily protein | chr5:726832-727980 FORWARD LENGTH=307	11	45	9	47	PF00646.31	F-box	1	3	37	35	23.9	2.6e-05	1
AT5G03300.1 | Symbols: ADK2 | adenosine kinase 2 | chr5:796573-798997 FORWARD LENGTH=345	29	339	27	343	PF00294.22	PfkB	1	3	298	313	254.1	1.6e-75	1
AT5G04280.1 | Symbols: | RNA-binding (RRM/RBD/RNP motifs) family protein with retrovirus zinc finger-like domain | chr5:1192461-1195413 FORWARD LENGTH=310	9	78	9	79	PF00076.20	RRM_1	1	1	69	70	74.2	4.8e-21	1
AT5G04280.1 | Symbols: | RNA-binding (RRM/RBD/RNP motifs) family protein with retrovirus zinc finger-like domain | chr5:1192461-1195413 FORWARD LENGTH=310	127	143	126	143	PF00098.21	zf-CCHC	1	2	18	17	33.8	2e-08	1
AT5G03630.1 | Symbols: ATMDAR2 | Pyridine nucleotide-disulphide oxidoreductase family protein | chr5:922378-924616 REVERSE LENGTH=435	8	323	7	323	PF07992.12	Pyr_redox_2	1	2	292	330	188.1	1.8e-55	1
AT5G04590.1 | Symbols: SIR | sulfite reductase | chr5:1319404-1322298 FORWARD LENGTH=642	127	187	121	190	PF03460.15	NIR_SIR_ferr	2	7	66	61	55.6	3.1e-15	1
AT5G04590.1 | Symbols: SIR | sulfite reductase | chr5:1319404-1322298 FORWARD LENGTH=642	224	402	222	402	PF01077.20	NIR_SIR	2	3	159	179	175.4	5.2e-52	1
AT5G04590.1 | Symbols: SIR | sulfite reductase | chr5:1319404-1322298 FORWARD LENGTH=642	420	473	420	485	PF03460.15	NIR_SIR_ferr		1	57	57	41.7	6.7e-11	1
AT5G04590.1 | Symbols: SIR | sulfite reductase | chr5:1319404-1322298 FORWARD LENGTH=642	499	639	495	641	PF01077.20	NIR_SIR		7	156	152	36.6	2.7e-09	1
AT5G05000.2 | Symbols: TOC34, ATTOC34, OEP34 | translocon at the outer envelope membrane of chloroplasts 34 | chr5:1474262-1475772 REVERSE LENGTH=313	39	229	39	235	PF04548.14	AIG1	1	1	206	215	131.6	2.2e-38	1
AT5G04430.2 | Symbols: BTR1, BTR1L | binding to TOMV RNA 1L (long form) | chr5:1250602-1253523 REVERSE LENGTH=334	37	102	36	103	PF00013.27	KH_1	3	2	65	67	53.5	1.4e-14	1
AT5G04430.2 | Symbols: BTR1, BTR1L | binding to TOMV RNA 1L (long form) | chr5:1250602-1253523 REVERSE LENGTH=334	123	188	122	189	PF00013.27	KH_1		2	65	67	48.8	4.3e-13	1
AT5G04430.2 | Symbols: BTR1, BTR1L | binding to TOMV RNA 1L (long form) | chr5:1250602-1253523 REVERSE LENGTH=334	257	322	256	323	PF00013.27	KH_1		2	65	68	53.8	1.1e-14	1
AT5G05730.2 | Symbols: ASA1 | anthranilate synthase alpha subunit 1 | chr5:1719740-1722811 REVERSE LENGTH=624	89	245	89	245	PF04715.11	Anth_synt_I_N	1	1	142	159	105.4	2.5e-30	1
AT5G05730.2 | Symbols: ASA1 | anthranilate synthase alpha subunit 1 | chr5:1719740-1722811 REVERSE LENGTH=624	307	606	305	606	PF00425.16	Chorismate_bind	1	3	258	303	276.1	2.6e-82	1
AT5G06210.1 | Symbols: | RNA binding (RRM/RBD/RNP motifs) family protein | chr5:1878497-1879515 FORWARD LENGTH=146	36	105	36	105	PF00076.20	RRM_1	1	1	69	70	76.3	1.1e-21	1
AT5G06460.1 | Symbols: ATUBA2, UBA 2 | ubiquitin activating enzyme 2 | chr5:1970239-1974382 FORWARD LENGTH=1077	76	451	75	465	PF00899.19	ThiF	1	2	224	385	108.5	3e-31	1
AT5G06460.1 | Symbols: ATUBA2, UBA 2 | ubiquitin activating enzyme 2 | chr5:1970239-1974382 FORWARD LENGTH=1077	249	320	249	320	PF16190.3	E1_FCCH	1	1	71	72	97.8	2.8e-28	1
AT5G06460.1 | Symbols: ATUBA2, UBA 2 | ubiquitin activating enzyme 2 | chr5:1970239-1974382 FORWARD LENGTH=1077	321	390	321	390	PF16191.3	E1_4HB	1	1	70	70	86	1.3e-24	1
AT5G06460.1 | Symbols: ATUBA2, UBA 2 | ubiquitin activating enzyme 2 | chr5:1970239-1974382 FORWARD LENGTH=1077	472	971	472	977	PF00899.19	ThiF	1	1	238	505	248.9	4.2e-74	1
AT5G06460.1 | Symbols: ATUBA2, UBA 2 | ubiquitin activating enzyme 2 | chr5:1970239-1974382 FORWARD LENGTH=1077	659	912	659	912	PF10585.7	UBA_e1_thiolCys	1	1	252	255	271.1	1.1e-80	1
AT5G06460.1 | Symbols: ATUBA2, UBA 2 | ubiquitin activating enzyme 2 | chr5:1970239-1974382 FORWARD LENGTH=1077	983	1072	983	1072	PF09358.8	E1_UFD	1	1	93	93	75	5.4e-21	1
AT5G08510.1 | Symbols: | Pentatricopeptide repeat (PPR) superfamily protein | chr5:2753099-2754731 FORWARD LENGTH=511	110	146	103	149	PF13812.4	PPR_3	1	8	44	37	16.9	0.0044	1
AT5G08510.1 | Symbols: | Pentatricopeptide repeat (PPR) superfamily protein | chr5:2753099-2754731 FORWARD LENGTH=511	177	226	177	227	PF13041.4	PPR_2	2	1	49	50	39.2	5.3e-10	1
AT5G08510.1 | Symbols: | Pentatricopeptide repeat (PPR) superfamily protein | chr5:2753099-2754731 FORWARD LENGTH=511	252	276	251	279	PF01535.18	PPR	2	2	26	25	13.3	0.07	1
AT5G08510.1 | Symbols: | Pentatricopeptide repeat (PPR) superfamily protein | chr5:2753099-2754731 FORWARD LENGTH=511	281	327	280	329	PF13041.4	PPR_2		2	48	47	41	1.4e-10	1
AT5G08510.1 | Symbols: | Pentatricopeptide repeat (PPR) superfamily protein | chr5:2753099-2754731 FORWARD LENGTH=511	355	380	354	382	PF01535.18	PPR		2	27	26	16.6	0.0061	1
AT5G08530.1 | Symbols: CI51 | 51 kDa subunit of complex I | chr5:2759848-2761726 REVERSE LENGTH=486	103	272	103	275	PF01512.15	Complex1_51K	1	1	148	170	155.7	7.1e-46	1
AT5G08530.1 | Symbols: CI51 | 51 kDa subunit of complex I | chr5:2759848-2761726 REVERSE LENGTH=486	299	348	298	350	PF10531.7	SLBB	1	2	56	56	31.3	1.2e-07	1
AT5G08530.1 | Symbols: CI51 | 51 kDa subunit of complex I | chr5:2759848-2761726 REVERSE LENGTH=486	389	471	388	472	PF10589.7	NADH_4Fe-4S	1	2	84	83	100.2	4.6e-29	1
AT5G09510.1 | Symbols: | Ribosomal protein S19 family protein | chr5:2955698-2956554 REVERSE LENGTH=152	50	135	50	135	PF00203.19	Ribosomal_S19	1	1	81	87	118.5	7.9e-35	1
AT5G09650.1 | Symbols: AtPPa6, PPa6 | pyrophosphorylase 6 | chr5:2991331-2993117 REVERSE LENGTH=300	107	284	107	285	PF00719.17	Pyrophosphatase	1	1	159	184	157.6	2e-46	1
AT5G10810.1 | Symbols: ATER, ER | enhancer of rudimentary protein, putative | chr5:3418897-3420556 REVERSE LENGTH=109	8	104	8	105	PF01133.15	ER	1	1	97	97	134.8	7.5e-40	1
AT5G10920.1 | Symbols: | L-Aspartase-like family protein | chr5:3441805-3443892 FORWARD LENGTH=517	63	357	63	357	PF00206.18	Lyase_1	1	1	312	312	244.6	1.4e-72	1
AT5G10920.1 | Symbols: | L-Aspartase-like family protein | chr5:3441805-3443892 FORWARD LENGTH=517	422	488	420	488	PF14698.4	ASL_C2	1	3	70	68	75.9	2.9e-21	1
AT5G11520.1 | Symbols: ASP3, YLS4 | aspartate aminotransferase 3 | chr5:3685257-3687721 REVERSE LENGTH=449	75	441	73	441	PF00155.19	Aminotran_1_2	1	3	363	384	315	6.1e-94	1
AT5G11880.1 | Symbols: | Pyridoxal-dependent decarboxylase family protein | chr5:3827806-3829942 REVERSE LENGTH=489	119	348	104	348	PF02784.14	Orn_Arg_deC_N	1	16	242	235	158	2.4e-46	1
AT5G11880.1 | Symbols: | Pyridoxal-dependent decarboxylase family protein | chr5:3827806-3829942 REVERSE LENGTH=489	359	462	357	463	PF00278.20	Orn_DAP_Arg_deC	1	3	109	115	59.2	3.3e-16	1
AT5G12250.1 | Symbols: TUB6 | beta-6 tubulin | chr5:3961317-3962971 REVERSE LENGTH=449	3	211	3	212	PF00091.23	Tubulin	1	1	196	209	235	7.4e-70	1
AT5G12250.1 | Symbols: TUB6 | beta-6 tubulin | chr5:3961317-3962971 REVERSE LENGTH=449	261	381	261	382	PF03953.15	Tubulin_C	1	1	124	124	135.1	1.3e-39	1
AT5G12330.4 | Symbols: LRP1 | Lateral root primordium (LRP) protein-related | chr5:3987677-3989408 REVERSE LENGTH=407	196	358	195	359	PF05142.10	DUF702	1	2	148	167	197.3	1.6e-58	1
AT5G13110.1 | Symbols: G6PD2 | glucose-6-phosphate dehydrogenase 2 | chr5:4158952-4161640 FORWARD LENGTH=596	114	292	113	292	PF00479.20	G6PD_N	1	2	177	180	194.8	1.7e-57	1
AT5G13110.1 | Symbols: G6PD2 | glucose-6-phosphate dehydrogenase 2 | chr5:4158952-4161640 FORWARD LENGTH=596	295	589	294	590	PF02781.14	G6PD_C	1	2	288	299	375.1	1.8e-112	1
AT5G13440.1 | Symbols: | Ubiquinol-cytochrome C reductase iron-sulfur subunit | chr5:4308431-4310022 REVERSE LENGTH=274	86	145	84	145	PF02921.12	UCR_TM	1	4	66	69	46.8	2.7e-12	1
AT5G13440.1 | Symbols: | Ubiquinol-cytochrome C reductase iron-sulfur subunit | chr5:4308431-4310022 REVERSE LENGTH=274	159	260	153	263	PF00355.24	Rieske	1	11	87	103	44.1	1.4e-11	1
AT5G13490.1 | Symbols: AAC2 | ADP/ATP carrier 2 | chr5:4336034-4337379 FORWARD LENGTH=385	83	179	81	180	PF00153.25	Mito_carr	3	4	96	97	82.3	1.6e-23	1
AT5G13490.1 | Symbols: AAC2 | ADP/ATP carrier 2 | chr5:4336034-4337379 FORWARD LENGTH=385	186	282	185	285	PF00153.25	Mito_carr		2	94	97	85	2.3e-24	1
AT5G13490.1 | Symbols: AAC2 | ADP/ATP carrier 2 | chr5:4336034-4337379 FORWARD LENGTH=385	289	373	287	379	PF00153.25	Mito_carr		4	91	88	58.1	5.7e-16	1
AT5G13520.1 | Symbols: | peptidase M1 family protein | chr5:4342117-4344571 REVERSE LENGTH=616	118	400	16	400	PF01433.18	Peptidase_M1	1	118	389	299	165.9	1.5e-48	1
AT5G13520.1 | Symbols: | peptidase M1 family protein | chr5:4342117-4344571 REVERSE LENGTH=616	477	612	474	612	PF09127.9	Leuk-A4-hydro_C	1	4	143	144	114.4	3.6e-33	1
AT5G13570.2 | Symbols: DCP2 | decapping 2 | chr5:4367532-4369992 FORWARD LENGTH=386	22	104	22	104	PF05026.11	DCP2	1	1	83	83	96.3	8.9e-28	1
AT5G13570.2 | Symbols: DCP2 | decapping 2 | chr5:4367532-4369992 FORWARD LENGTH=386	109	230	107	239	PF00293.26	NUDIX	1	4	117	134	32	9.5e-08	1
AT5G15650.1 | Symbols: RGP2, ATRGP2 | reversibly glycosylated polypeptide 2 | chr5:5092203-5094093 FORWARD LENGTH=360	18	352	17	353	PF03214.11	RGP	1	2	341	340	593.5	1.1e-178	1
AT5G16390.1 | Symbols: CAC1, CAC1A, BCCP, BCCP1 | chloroplastic acetylcoenzyme A carboxylase 1 | chr5:5361098-5363020 REVERSE LENGTH=280	205	277	204	278	PF00364.20	Biotin_lipoyl	1	2	72	73	82.8	1e-23	1
AT5G16780.1 | Symbols: DOT2, MDF | SART-1 family | chr5:5517784-5521566 REVERSE LENGTH=820	175	727	161	727	PF03343.11	SART-1	1	67	630	632	237.2	3.6e-70	1
AT5G17530.3 | Symbols: | phosphoglucosamine mutase family protein | chr5:5777716-5781863 FORWARD LENGTH=614	93	238	91	243	PF02878.14	PGM_PMM_I	1	3	133	147	90.3	7.9e-26	1
AT5G17530.3 | Symbols: | phosphoglucosamine mutase family protein | chr5:5777716-5781863 FORWARD LENGTH=614	267	372	265	372	PF02879.14	PGM_PMM_II	1	3	103	106	74.2	9.8e-21	1
AT5G17530.3 | Symbols: | phosphoglucosamine mutase family protein | chr5:5777716-5781863 FORWARD LENGTH=614	377	482	376	499	PF02880.14	PGM_PMM_III	1	2	98	108	49	5.3e-13	1
AT5G17580.1 | Symbols: | Phototropic-responsive NPH3 family protein | chr5:5795302-5797031 FORWARD LENGTH=548	6	91	1	101	PF00651.29	BTB	1	10	98	89	25.6	9.7e-06	1
AT5G17580.1 | Symbols: | Phototropic-responsive NPH3 family protein | chr5:5795302-5797031 FORWARD LENGTH=548	180	416	180	417	PF03000.12	NPH3	1	1	228	240	180	5.3e-53	1
AT5G18550.1 | Symbols: | Zinc finger C-x8-C-x5-C-x3-H type family protein | chr5:6160515-6162729 FORWARD LENGTH=465	53	78	52	78	PF00642.22	zf-CCCH	5	2	27	26	37.9	1e-09	1
AT5G18550.1 | Symbols: | Zinc finger C-x8-C-x5-C-x3-H type family protein | chr5:6160515-6162729 FORWARD LENGTH=465	99	124	98	124	PF00642.22	zf-CCCH		2	27	26	39.2	4e-10	1
AT5G18550.1 | Symbols: | Zinc finger C-x8-C-x5-C-x3-H type family protein | chr5:6160515-6162729 FORWARD LENGTH=465	147	171	146	172	PF00642.22	zf-CCCH		2	26	25	38.2	8.2e-10	1
AT5G18550.1 | Symbols: | Zinc finger C-x8-C-x5-C-x3-H type family protein | chr5:6160515-6162729 FORWARD LENGTH=465	303	327	301	327	PF00642.22	zf-CCCH		3	27	25	38.3	7.6e-10	1
AT5G18550.1 | Symbols: | Zinc finger C-x8-C-x5-C-x3-H type family protein | chr5:6160515-6162729 FORWARD LENGTH=465	348	371	346	372	PF00642.22	zf-CCCH		3	26	24	33.8	2e-08	1
AT5G16930.1 | Symbols: | AAA-type ATPase family protein | chr5:5568578-5571565 FORWARD LENGTH=644	66	333	63	333	PF12037.6	DUF3523	1	4	265	268	357.4	4e-107	1
AT5G16930.1 | Symbols: | AAA-type ATPase family protein | chr5:5568578-5571565 FORWARD LENGTH=644	401	527	401	528	PF00004.27	AAA	1	1	131	132	78.4	5.8e-22	1
AT5G19350.1 | Symbols: | RNA-binding (RRM/RBD/RNP motifs) family protein | chr5:6518978-6521295 FORWARD LENGTH=425	26	95	26	96	PF00076.20	RRM_1	3	1	69	70	50	1.8e-13	1
AT5G19350.1 | Symbols: | RNA-binding (RRM/RBD/RNP motifs) family protein | chr5:6518978-6521295 FORWARD LENGTH=425	118	185	118	189	PF00076.20	RRM_1		1	66	68	55.8	2.7e-15	1
AT5G19350.1 | Symbols: | RNA-binding (RRM/RBD/RNP motifs) family protein | chr5:6518978-6521295 FORWARD LENGTH=425	240	302	239	303	PF00076.20	RRM_1		2	69	68	60.5	8.9e-17	1
AT5G19690.1 | Symbols: STT3A | staurosporin and temperature sensitive 3-like A | chr5:6652649-6658214 FORWARD LENGTH=779	22	461	22	487	PF02516.12	STT3	1	1	452	459	359	4.1e-107	1
AT5G19760.1 | Symbols: | Mitochondrial substrate carrier family protein | chr5:6679591-6681845 REVERSE LENGTH=298	14	89	11	97	PF00153.25	Mito_carr	3	5	88	84	52.9	2.4e-14	1
AT5G19760.1 | Symbols: | Mitochondrial substrate carrier family protein | chr5:6679591-6681845 REVERSE LENGTH=298	102	197	101	199	PF00153.25	Mito_carr		2	95	96	66.7	1.1e-18	1
AT5G19760.1 | Symbols: | Mitochondrial substrate carrier family protein | chr5:6679591-6681845 REVERSE LENGTH=298	209	293	203	296	PF00153.25	Mito_carr		10	93	85	50.5	1.4e-13	1
AT5G19020.1 | Symbols: MEF18 | mitochondrial editing factor 18 | chr5:6352771-6354828 REVERSE LENGTH=685	78	100	77	101	PF01535.18	PPR	6	2	24	23	11.8	0.21	1
AT5G19020.1 | Symbols: MEF18 | mitochondrial editing factor 18 | chr5:6352771-6354828 REVERSE LENGTH=685	138	184	136	185	PF13041.4	PPR_2	3	3	49	47	45.9	4.2e-12	1
AT5G19020.1 | Symbols: MEF18 | mitochondrial editing factor 18 | chr5:6352771-6354828 REVERSE LENGTH=685	212	238	209	239	PF01535.18	PPR		4	30	27	16.3	0.0074	1
AT5G19020.1 | Symbols: MEF18 | mitochondrial editing factor 18 | chr5:6352771-6354828 REVERSE LENGTH=685	240	269	240	270	PF01535.18	PPR		1	30	30	33	3.7e-08	1
AT5G19020.1 | Symbols: MEF18 | mitochondrial editing factor 18 | chr5:6352771-6354828 REVERSE LENGTH=685	271	300	271	301	PF01535.18	PPR		1	30	30	26.8	3.3e-06	1
AT5G19020.1 | Symbols: MEF18 | mitochondrial editing factor 18 | chr5:6352771-6354828 REVERSE LENGTH=685	375	396	372	402	PF01535.18	PPR		4	25	22	19.6	0.00068	1
AT5G19020.1 | Symbols: MEF18 | mitochondrial editing factor 18 | chr5:6352771-6354828 REVERSE LENGTH=685	400	447	400	450	PF13041.4	PPR_2		1	47	48	31.4	1.4e-07	1
AT5G19020.1 | Symbols: MEF18 | mitochondrial editing factor 18 | chr5:6352771-6354828 REVERSE LENGTH=685	478	498	478	502	PF01535.18	PPR		5	25	21	9.8	0.92	1
AT5G19020.1 | Symbols: MEF18 | mitochondrial editing factor 18 | chr5:6352771-6354828 REVERSE LENGTH=685	510	554	505	554	PF13041.4	PPR_2		6	50	45	31.9	9.9e-08	1
AT5G19020.1 | Symbols: MEF18 | mitochondrial editing factor 18 | chr5:6352771-6354828 REVERSE LENGTH=685	573	604	572	605	PF12854.5	PPR_1	1	2	33	32	23.9	2.3e-05	1
AT5G20890.1 | Symbols: | TCP-1/cpn60 chaperonin family protein | chr5:7087020-7089906 REVERSE LENGTH=527	30	517	30	520	PF00118.22	Cpn60_TCP1	1	1	488	493	492.8	8.7e-148	1
AT5G20940.1 | Symbols: | Glycosyl hydrolase family protein | chr5:7104076-7106653 REVERSE LENGTH=626	51	378	51	378	PF00933.19	Glyco_hydro_3	1	1	319	340	237.5	2.1e-70	1
AT5G20940.1 | Symbols: | Glycosyl hydrolase family protein | chr5:7104076-7106653 REVERSE LENGTH=626	415	621	415	622	PF01915.20	Glyco_hydro_3_C	1	1	196	217	124.7	4e-36	1
AT5G20830.1 | Symbols: SUS1, ASUS1, atsus1 | sucrose synthase 1 | chr5:7050599-7054032 REVERSE LENGTH=808	10	555	10	555	PF00862.17	Sucrose_synth	1	1	548	548	911.4	1.4e-274	1
AT5G20830.1 | Symbols: SUS1, ASUS1, atsus1 | sucrose synthase 1 | chr5:7050599-7054032 REVERSE LENGTH=808	566	741	558	744	PF00534.18	Glycos_transf_1	1	9	168	177	116.1	1.1e-33	1
AT5G13370.1 | Symbols: | Auxin-responsive GH3 family protein | chr5:4286996-4289424 FORWARD LENGTH=595	17	564	16	565	PF03321.11	GH3	1	2	526	558	636.1	4.5e-191	1
AT5G20990.1 | Symbols: B73, SIR4, CNX, CHL6, CNX1 | molybdopterin biosynthesis CNX1 protein / molybdenum cofactor biosynthesis enzyme CNX1 (CNX1) | chr5:7128737-7133397 REVERSE LENGTH=670	19	181	17	181	PF03453.15	MoeA_N	1	3	115	163	105.4	1.6e-30	1
AT5G20990.1 | Symbols: B73, SIR4, CNX, CHL6, CNX1 | molybdopterin biosynthesis CNX1 protein / molybdenum cofactor biosynthesis enzyme CNX1 (CNX1) | chr5:7128737-7133397 REVERSE LENGTH=670	194	342	194	343	PF00994.22	MoCF_biosynth	1	1	143	159	96.3	1.2e-27	1
AT5G20990.1 | Symbols: B73, SIR4, CNX, CHL6, CNX1 | molybdopterin biosynthesis CNX1 protein / molybdenum cofactor biosynthesis enzyme CNX1 (CNX1) | chr5:7128737-7133397 REVERSE LENGTH=670	356	432	356	433	PF03454.13	MoeA_C	1	1	71	78	73.8	8.6e-21	1
AT5G20990.1 | Symbols: B73, SIR4, CNX, CHL6, CNX1 | molybdopterin biosynthesis CNX1 protein / molybdenum cofactor biosynthesis enzyme CNX1 (CNX1) | chr5:7128737-7133397 REVERSE LENGTH=670	470	618	470	618	PF00994.22	MoCF_biosynth	1	1	144	156	117	4.6e-34	1
AT5G20960.1 | Symbols: AAO1, AO1, ATAO, AT-AO1, AOalpha, AtAO1 | aldehyde oxidase 1 | chr5:7116783-7122338 FORWARD LENGTH=1368	25	93	23	95	PF00111.25	Fer2	1	3	76	77	27.2	2.5e-06	1
AT5G20960.1 | Symbols: AAO1, AO1, ATAO, AT-AO1, AOalpha, AtAO1 | aldehyde oxidase 1 | chr5:7116783-7122338 FORWARD LENGTH=1368	104	189	104	189	PF01799.18	Fer2_2	1	1	75	86	74.7	3.6e-21	1
AT5G20960.1 | Symbols: AAO1, AO1, ATAO, AT-AO1, AOalpha, AtAO1 | aldehyde oxidase 1 | chr5:7116783-7122338 FORWARD LENGTH=1368	250	425	249	425	PF00941.19	FAD_binding_5	1	2	171	179	150.8	2.7e-44	1
AT5G20960.1 | Symbols: AAO1, AO1, ATAO, AT-AO1, AOalpha, AtAO1 | aldehyde oxidase 1 | chr5:7116783-7122338 FORWARD LENGTH=1368	443	546	442	548	PF03450.15	CO_deh_flav_C	1	2	101	105	87.4	5.4e-25	1
AT5G20960.1 | Symbols: AAO1, AO1, ATAO, AT-AO1, AOalpha, AtAO1 | aldehyde oxidase 1 | chr5:7116783-7122338 FORWARD LENGTH=1368	611	720	611	721	PF01315.20	Ald_Xan_dh_C	1	1	109	110	122.3	9.8e-36	1
AT5G20960.1 | Symbols: AAO1, AO1, ATAO, AT-AO1, AOalpha, AtAO1 | aldehyde oxidase 1 | chr5:7116783-7122338 FORWARD LENGTH=1368	748	1271	738	1271	PF02738.16	Ald_Xan_dh_C2	1	12	544	551	542.8	7.4e-163	1
AT5G22320.1 | Symbols: | Leucine-rich repeat (LRR) family protein | chr5:7388175-7390426 REVERSE LENGTH=452	41	81	41	83	PF12799.5	LRR_4	1	1	41	41	30.6	2.7e-07	1
AT5G22440.1 | Symbols: | Ribosomal protein L1p/L10e family | chr5:7435328-7436486 REVERSE LENGTH=217	21	212	16	212	PF00687.19	Ribosomal_L1	1	2	205	204	151.6	2.1e-44	1
AT5G22010.1 | Symbols: AtRFC1, RFC1 | replication factor C1 | chr5:7280632-7287037 REVERSE LENGTH=956	203	279	202	279	PF00533.24	BRCT	1	2	79	78	60.5	1.5e-16	1
AT5G22010.1 | Symbols: AtRFC1, RFC1 | replication factor C1 | chr5:7280632-7287037 REVERSE LENGTH=956	396	495	396	520	PF00004.27	AAA	1	1	93	110	43.7	3.1e-11	1
AT5G22010.1 | Symbols: AtRFC1, RFC1 | replication factor C1 | chr5:7280632-7287037 REVERSE LENGTH=956	665	827	665	828	PF08519.10	RFC1	1	1	156	166	159.9	4.9e-47	1
AT5G05010.1 | Symbols: | clathrin adaptor complexes medium subunit family protein | chr5:1477137-1479872 FORWARD LENGTH=527	282	499	273	526	PF00928.19	Adap_comp_sub	1	12	236	237	105.5	2.6e-30	1
AT5G23250.1 | Symbols: | Succinyl-CoA ligase, alpha subunit | chr5:7830460-7832491 FORWARD LENGTH=341	50	143	50	143	PF02629.17	CoA_binding	1	1	96	96	108.2	2.2e-31	1
AT5G23250.1 | Symbols: | Succinyl-CoA ligase, alpha subunit | chr5:7830460-7832491 FORWARD LENGTH=341	196	316	196	318	PF00549.17	Ligase_CoA	1	1	151	151	76.7	1.5e-21	1
AT5G22780.1 | Symbols: | Adaptor protein complex AP-2, alpha subunit | chr5:7590100-7597828 REVERSE LENGTH=1013	26	580	23	582	PF01602.18	Adaptin_N	1	4	522	558	382.1	3.5e-114	1
AT5G22780.1 | Symbols: | Adaptor protein complex AP-2, alpha subunit | chr5:7590100-7597828 REVERSE LENGTH=1013	748	842	747	849	PF02883.18	Alpha_adaptinC2	1	2	101	100	57.6	1.2e-15	1
AT5G22780.1 | Symbols: | Adaptor protein complex AP-2, alpha subunit | chr5:7590100-7597828 REVERSE LENGTH=1013	856	964	856	966	PF02296.14	Alpha_adaptin_C	1	1	111	112	62.1	4.5e-17	1
AT5G23540.1 | Symbols: | Mov34/MPN/PAD-1 family protein | chr5:7937772-7939339 FORWARD LENGTH=308	26	137	25	138	PF01398.19	JAB	1	2	117	117	111	2.8e-32	1
AT5G23540.1 | Symbols: | Mov34/MPN/PAD-1 family protein | chr5:7937772-7939339 FORWARD LENGTH=308	172	289	172	306	PF13012.4	MitMem_reg	1	1	81	125	48.9	6.7e-13	1
AT3G17330.1 | Symbols: ECT6 | evolutionarily conserved C-terminal region 6 | chr3:5917253-5919458 REVERSE LENGTH=595	271	412	270	412	PF04146.13	YTH	1	2	123	142	117.7	2.1e-34	1
AT5G23680.1 | Symbols: | Sterile alpha motif (SAM) domain-containing protein | chr5:7985573-7986460 REVERSE LENGTH=295	234	290	232	290	PF07647.15	SAM_2	1	8	65	58	50.8	1.2e-13	1
AT5G25754.1 | Symbols: | RNA polymerase I-associated factor PAF67 | chr5:8953564-8955511 FORWARD LENGTH=514	105	500	105	501	PF10255.7	Paf67	1	1	403	411	487.6	2.7e-146	1
AT5G26210.1 | Symbols: AL4 | alfin-like 4 | chr5:9158566-9160221 REVERSE LENGTH=255	11	138	11	139	PF12165.6	Alfin	1	1	126	128	216.9	4.5e-65	1
AT5G26210.1 | Symbols: AL4 | alfin-like 4 | chr5:9158566-9160221 REVERSE LENGTH=255	202	250	201	251	PF00628.27	PHD	1	2	51	50	39.8	2.7e-10	1
AT5G26260.1 | Symbols: | TRAF-like family protein | chr5:9200492-9202153 FORWARD LENGTH=351	67	194	67	194	PF00917.24	MATH	2	1	113	128	77	1e-21	1
AT5G26260.1 | Symbols: | TRAF-like family protein | chr5:9200492-9202153 FORWARD LENGTH=351	221	339	219	343	PF00917.24	MATH		3	110	120	17.4	0.0034	1
AT5G24530.1 | Symbols: DMR6 | 2-oxoglutarate (2OG) and Fe(II)-dependent oxygenase superfamily protein | chr5:8378964-8383154 FORWARD LENGTH=341	39	143	38	144	PF14226.4	DIOX_N	1	2	117	118	90.9	8.4e-26	1
AT5G24530.1 | Symbols: DMR6 | 2-oxoglutarate (2OG) and Fe(II)-dependent oxygenase superfamily protein | chr5:8378964-8383154 FORWARD LENGTH=341	190	288	188	288	PF03171.18	2OG-FeII_Oxy	1	3	101	100	94.1	5.3e-27	1
AT5G27470.1 | Symbols: | seryl-tRNA synthetase / serine--tRNA ligase | chr5:9695087-9697154 FORWARD LENGTH=451	1	112	1	112	PF02403.20	Seryl_tRNA_N	1	1	108	112	96.4	9.6e-28	1
AT5G27470.1 | Symbols: | seryl-tRNA synthetase / serine--tRNA ligase | chr5:9695087-9697154 FORWARD LENGTH=451	224	411	224	411	PF00587.23	tRNA-synt_2b	1	1	179	189	129	1.7e-37	1
AT5G26830.1 | Symbols: | Threonyl-tRNA synthetase | chr5:9437351-9441568 FORWARD LENGTH=709	75	135	75	135	PF02824.19	TGS	1	1	60	61	54.4	8.6e-15	1
AT5G26830.1 | Symbols: | Threonyl-tRNA synthetase | chr5:9437351-9441568 FORWARD LENGTH=709	243	292	243	292	PF07973.12	tRNA_SAD	1	1	44	51	51.3	8.4e-14	1
AT5G26830.1 | Symbols: | Threonyl-tRNA synthetase | chr5:9437351-9441568 FORWARD LENGTH=709	392	602	391	602	PF00587.23	tRNA-synt_2b	1	2	179	216	130	8.3e-38	1
AT5G26830.1 | Symbols: | Threonyl-tRNA synthetase | chr5:9437351-9441568 FORWARD LENGTH=709	614	703	614	704	PF03129.18	HGTP_anticodon	1	1	93	93	75	3.6e-21	1
AT5G35360.3 | Symbols: CAC2 | acetyl Co-enzyme a carboxylase biotin carboxylase subunit | chr5:13584300-13588163 FORWARD LENGTH=555	75	182	74	182	PF00289.20	Biotin_carb_N	1	3	110	108	138.3	1.2e-40	1
AT5G35360.3 | Symbols: CAC2 | acetyl Co-enzyme a carboxylase biotin carboxylase subunit | chr5:13584300-13588163 FORWARD LENGTH=555	187	394	187	396	PF02786.15	CPSase_L_D2	1	1	209	209	272.6	1.8e-81	1
AT5G35360.3 | Symbols: CAC2 | acetyl Co-enzyme a carboxylase biotin carboxylase subunit | chr5:13584300-13588163 FORWARD LENGTH=555	408	513	408	515	PF02785.17	Biotin_carb_C	1	1	106	106	131.5	1.1e-38	1
AT5G37510.2 | Symbols: EMB1467, CI76 | NADH-ubiquinone dehydrogenase, mitochondrial, putative | chr5:14897490-14900447 FORWARD LENGTH=748	72	148	71	149	PF13510.4	Fer2_4	1	2	81	81	66.7	1.3e-18	1
AT5G37510.2 | Symbols: EMB1467, CI76 | NADH-ubiquinone dehydrogenase, mitochondrial, putative | chr5:14897490-14900447 FORWARD LENGTH=748	155	192	155	194	PF10588.7	NADH-G_4Fe-4S_3	1	1	38	38	56.5	1.3e-15	1
AT5G37510.2 | Symbols: EMB1467, CI76 | NADH-ubiquinone dehydrogenase, mitochondrial, putative | chr5:14897490-14900447 FORWARD LENGTH=748	343	662	343	663	PF00384.20	Molybdopterin	1	1	431	432	247.1	3e-73	1
AT5G37510.2 | Symbols: EMB1467, CI76 | NADH-ubiquinone dehydrogenase, mitochondrial, putative | chr5:14897490-14900447 FORWARD LENGTH=748	703	738	692	738	PF09326.9	NADH_dhqG_C	1	16	51	36	49.9	3.5e-13	1
AT5G27700.1 | Symbols: | Ribosomal protein S21e | chr5:9807541-9808048 REVERSE LENGTH=82	1	77	1	79	PF01249.16	Ribosomal_S21e	1	1	77	77	125.6	5.6e-37	1
AT5G40770.1 | Symbols: ATPHB3, PHB3 | prohibitin 3 | chr5:16315589-16316621 REVERSE LENGTH=277	34	215	33	223	PF01145.23	Band_7	1	2	170	186	73.9	1.5e-20	1
AT5G40810.1 | Symbols: | Cytochrome C1 family | chr5:16340200-16342327 FORWARD LENGTH=307	78	294	78	296	PF02167.13	Cytochrom_C1	1	1	217	217	320.3	5.9e-96	1
AT5G41970.1 | Symbols: | Metal-dependent protein hydrolase | chr5:16791198-16792961 FORWARD LENGTH=373	52	371	52	371	PF03690.11	UPF0160	1	1	317	320	453	6.6e-136	1
AT5G42540.2 | Symbols: XRN2 | exoribonuclease 2 | chr5:17007513-17014534 FORWARD LENGTH=1023	1	255	1	256	PF03159.16	XRN_N	1	1	236	258	333.1	7.6e-100	1
AT5G42540.2 | Symbols: XRN2 | exoribonuclease 2 | chr5:17007513-17014534 FORWARD LENGTH=1023	264	279	264	280	PF00098.21	zf-CCHC	1	1	16	16	21.9	0.00011	1
AT5G42570.1 | Symbols: | B-cell receptor-associated 31-like | chr5:17021459-17022497 REVERSE LENGTH=218	4	192	1	192	PF05529.10	Bap31	1	7	200	198	54.7	9e-15	1
AT5G42740.1 | Symbols: | Sugar isomerase (SIS) family protein | chr5:17136080-17140622 FORWARD LENGTH=560	52	548	52	548	PF00342.17	PGI	1	1	486	502	736.9	8.6e-222	1
AT5G39620.1 | Symbols: AtRABG1, RABG1 | RAB GTPase homolog G1 | chr5:15864166-15865782 REVERSE LENGTH=204	7	174	7	175	PF00071.20	Ras	1	1	161	168	175.6	5.3e-52	1
AT5G43010.1 | Symbols: RPT4A | regulatory particle triple-A ATPase 4A | chr5:17248563-17251014 REVERSE LENGTH=399	176	309	176	309	PF00004.27	AAA	1	1	132	136	147.2	3.1e-43	1
AT5G43830.1 | Symbols: | Aluminium induced protein with YGL and LRDR motifs | chr5:17622593-17624239 REVERSE LENGTH=251	2	227	2	227	PF12481.6	DUF3700	1	1	228	228	368.8	8.2e-111	1
AT5G43940.2 | Symbols: HOT5 | GroES-like zinc-binding dehydrogenase family protein | chr5:17684265-17686379 FORWARD LENGTH=391	47	174	46	175	PF08240.10	ADH_N	1	2	108	132	88	3.3e-25	1
AT5G43940.2 | Symbols: HOT5 | GroES-like zinc-binding dehydrogenase family protein | chr5:17684265-17686379 FORWARD LENGTH=391	218	342	217	351	PF00107.24	ADH_zinc_N	1	2	124	127	84.9	3.8e-24	1
AT5G43960.1 | Symbols: | Nuclear transport factor 2 (NTF2) family protein with RNA binding (RRM-RBD-RNP motifs) domain | chr5:17689154-17691653 REVERSE LENGTH=450	11	125	11	125	PF02136.18	NTF2	1	1	120	123	91.4	5.3e-26	1
AT5G43960.1 | Symbols: | Nuclear transport factor 2 (NTF2) family protein with RNA binding (RRM-RBD-RNP motifs) domain | chr5:17689154-17691653 REVERSE LENGTH=450	318	386	318	388	PF00076.20	RRM_1	1	1	68	70	36.1	3.7e-09	1
AT5G46070.1 | Symbols: | Guanylate-binding family protein | chr5:18683468-18688397 FORWARD LENGTH=1082	51	310	50	313	PF02263.17	GBP	1	2	257	261	210.5	2.3e-62	1
AT5G46070.1 | Symbols: | Guanylate-binding family protein | chr5:18683468-18688397 FORWARD LENGTH=1082	314	618	314	636	PF02841.12	GBP_C	1	1	281	312	157.3	5.2e-46	1
AT5G47030.1 | Symbols: | ATPase, F1 complex, delta/epsilon subunit | chr5:19090384-19092034 FORWARD LENGTH=203	73	145	73	153	PF02823.14	ATP-synt_DE_N	1	1	73	74	58.5	4.2e-16	1
AT5G47890.1 | Symbols: | NADH-ubiquinone oxidoreductase B8 subunit, putative | chr5:19388806-19390409 FORWARD LENGTH=97	28	78	28	79	PF05047.14	L51_S25_CI-B8	1	1	51	51	56.6	1.7e-15	1
AT5G46750.1 | Symbols: AGD9 | ARF-GAP domain 9 | chr5:18969950-18971817 REVERSE LENGTH=402	12	116	10	126	PF01412.16	ArfGap	1	3	111	110	117.1	3.6e-34	1
AT5G48180.1 | Symbols: NSP5 | nitrile specifier protein 5 | chr5:19541283-19542358 REVERSE LENGTH=326	20	64	20	65	PF01344.23	Kelch_1	4	1	43	45	37	1.6e-09	1
AT5G48180.1 | Symbols: NSP5 | nitrile specifier protein 5 | chr5:19541283-19542358 REVERSE LENGTH=326	72	115	72	117	PF01344.23	Kelch_1		1	44	44	38.1	7.4e-10	1
AT5G48180.1 | Symbols: NSP5 | nitrile specifier protein 5 | chr5:19541283-19542358 REVERSE LENGTH=326	123	164	122	165	PF01344.23	Kelch_1		2	43	42	30.9	1.3e-07	1
AT5G48180.1 | Symbols: NSP5 | nitrile specifier protein 5 | chr5:19541283-19542358 REVERSE LENGTH=326	173	212	172	214	PF01344.23	Kelch_1		2	42	41	20.1	0.00031	1
AT5G48870.1 | Symbols: SAD1 | Small nuclear ribonucleoprotein family protein | chr5:19813407-19814362 FORWARD LENGTH=88	13	80	12	80	PF01423.20	LSM	1	2	67	68	71.7	2.6e-20	1
AT5G48650.1 | Symbols: | Nuclear transport factor 2 (NTF2) family protein with RNA binding (RRM-RBD-RNP motifs) domain | chr5:19727279-19729533 FORWARD LENGTH=458	16	133	16	133	PF02136.18	NTF2	1	1	120	125	109.3	1.5e-31	1
AT5G48650.1 | Symbols: | Nuclear transport factor 2 (NTF2) family protein with RNA binding (RRM-RBD-RNP motifs) domain | chr5:19727279-19729533 FORWARD LENGTH=458	321	379	321	387	PF00076.20	RRM_1	1	1	58	60	37.4	1.5e-09	1
AT5G50250.1 | Symbols: CP31B | chloroplast RNA-binding protein 31B | chr5:20452677-20453965 REVERSE LENGTH=289	115	184	115	185	PF00076.20	RRM_1	2	1	69	70	73.2	1e-20	1
AT5G50250.1 | Symbols: CP31B | chloroplast RNA-binding protein 31B | chr5:20452677-20453965 REVERSE LENGTH=289	209	279	209	279	PF00076.20	RRM_1		1	70	71	75.3	2.3e-21	1
AT5G49930.1 | Symbols: emb1441 | zinc knuckle (CCHC-type) family protein | chr5:20308260-20312736 REVERSE LENGTH=1080	10	161	7	194	PF05833.9	FbpA	2	4	158	162	63.2	1.7e-17	1
AT5G49930.1 | Symbols: emb1441 | zinc knuckle (CCHC-type) family protein | chr5:20308260-20312736 REVERSE LENGTH=1080	215	515	189	532	PF05833.9	FbpA		185	416	303	49.4	2.7e-13	1
AT5G49930.1 | Symbols: emb1441 | zinc knuckle (CCHC-type) family protein | chr5:20308260-20312736 REVERSE LENGTH=1080	540	639	540	641	PF05670.11	DUF814	1	1	88	101	88.5	2e-25	1
AT5G49930.1 | Symbols: emb1441 | zinc knuckle (CCHC-type) family protein | chr5:20308260-20312736 REVERSE LENGTH=1080	925	939	924	940	PF00098.21	zf-CCHC	1	2	16	15	21.4	0.00017	1
AT5G49930.1 | Symbols: emb1441 | zinc knuckle (CCHC-type) family protein | chr5:20308260-20312736 REVERSE LENGTH=1080	962	1057	959	1058	PF11923.6	DUF3441	1	4	115	112	85.7	1.9e-24	1
AT5G52240.1 | Symbols: MSBP1, ATMP1, AtMAPR5 | membrane steroid binding protein 1 | chr5:21213121-21214557 FORWARD LENGTH=220	76	170	76	171	PF00173.26	Cyt-b5	1	1	73	96	51.5	7.4e-14	1
AT5G51660.1 | Symbols: CPSF160, ATCPSF160 | cleavage and polyadenylation specificity factor 160 | chr5:20980250-20989268 FORWARD LENGTH=1442	176	705	134	726	PF10433.7	MMS1_N	1	37	461	555	128.7	2.1e-37	1
AT5G51660.1 | Symbols: CPSF160, ATCPSF160 | cleavage and polyadenylation specificity factor 160 | chr5:20980250-20989268 FORWARD LENGTH=1442	1083	1407	1082	1408	PF03178.13	CPSF_A	1	2	323	332	293.8	1.5e-87	1
AT5G52380.1 | Symbols: | VASCULAR-RELATED NAC-DOMAIN 6 | chr5:21261521-21263061 REVERSE LENGTH=268	99	115	97	116	PF14392.4	zf-CCHC_4	2	32	48	17	13.5	0.039	1
AT5G52380.1 | Symbols: | VASCULAR-RELATED NAC-DOMAIN 6 | chr5:21261521-21263061 REVERSE LENGTH=268	126	141	125	141	PF00098.21	zf-CCHC	2	2	17	16	17.7	0.0024	1
AT5G52380.1 | Symbols: | VASCULAR-RELATED NAC-DOMAIN 6 | chr5:21261521-21263061 REVERSE LENGTH=268	154	169	153	169	PF00098.21	zf-CCHC		3	18	16	19.5	0.00065	1
AT5G52380.1 | Symbols: | VASCULAR-RELATED NAC-DOMAIN 6 | chr5:21261521-21263061 REVERSE LENGTH=268	180	195	177	196	PF14392.4	zf-CCHC_4		33	48	16	7.9	2.2	1
AT5G42790.1 | Symbols: PAF1, ATPSM30, ARS5 | proteasome alpha subunit F1 | chr5:17159270-17160975 REVERSE LENGTH=278	6	28	6	28	PF10584.7	Proteasome_A_N	1	1	23	23	51.6	4.8e-14	1
AT5G42790.1 | Symbols: PAF1, ATPSM30, ARS5 | proteasome alpha subunit F1 | chr5:17159270-17160975 REVERSE LENGTH=278	29	213	29	214	PF00227.24	Proteasome	1	1	189	191	192.1	6.1e-57	1
AT5G27030.2 | Symbols: TPR3 | TOPLESS-related 3 | chr5:9508913-9515263 REVERSE LENGTH=1134	474	508	468	508	PF00400.30	WD40	2	7	38	35	17.1	0.0068	1
AT5G27030.2 | Symbols: TPR3 | TOPLESS-related 3 | chr5:9508913-9515263 REVERSE LENGTH=1134	925	958	920	958	PF00400.30	WD40		6	38	34	16.8	0.0085	1
AT5G44200.1 | Symbols: CBP20, ATCBP20 | CAP-binding protein 20 | chr5:17802062-17803875 REVERSE LENGTH=257	36	106	36	106	PF00076.20	RRM_1	1	1	70	71	56.6	1.5e-15	1
AT1G79530.1 | Symbols: GAPCP-1 | glyceraldehyde-3-phosphate dehydrogenase of plastid 1 | chr1:29916232-29919088 REVERSE LENGTH=422	88	188	87	189	PF00044.22	Gp_dh_N	1	2	100	101	131.8	8.8e-39	1
AT1G79530.1 | Symbols: GAPCP-1 | glyceraldehyde-3-phosphate dehydrogenase of plastid 1 | chr1:29916232-29919088 REVERSE LENGTH=422	241	398	241	398	PF02800.18	Gp_dh_C	1	1	158	158	231.3	3.3e-69	1
AT5G46290.3 | Symbols: KASI | 3-ketoacyl-acyl carrier protein synthase I | chr5:18774439-18776629 REVERSE LENGTH=489	61	307	60	307	PF00109.24	ketoacyl-synt	1	2	253	264	202.7	6.5e-60	1
AT5G46290.3 | Symbols: KASI | 3-ketoacyl-acyl carrier protein synthase I | chr5:18774439-18776629 REVERSE LENGTH=489	316	427	315	428	PF02801.20	Ketoacyl-synt_C	1	2	116	115	116.4	6e-34	1
AT1G79440.1 | Symbols: ALDH5F1, SSADH1, SSADH | aldehyde dehydrogenase 5F1 | chr1:29882525-29887275 REVERSE LENGTH=528	61	520	61	520	PF00171.20	Aldedh	1	1	462	464	571.2	1.2e-171	1
AT5G54430.1 | Symbols: ATPHOS32, PHOS32 | Adenine nucleotide alpha hydrolases-like superfamily protein | chr5:22097563-22099693 REVERSE LENGTH=242	47	203	46	203	PF00582.24	Usp	1	2	141	157	99.2	2.5e-28	1
AT1G79150.1 | Symbols: | binding | chr1:29772716-29777874 REVERSE LENGTH=830	190	280	189	280	PF07540.9	NOC3p	1	2	92	91	105.7	1.2e-30	1
AT1G79150.1 | Symbols: | binding | chr1:29772716-29777874 REVERSE LENGTH=830	556	710	554	710	PF03914.15	CBF	1	3	161	163	84.7	6.2e-24	1
AT5G54510.1 | Symbols: GH3.6, DFL1 | Auxin-responsive GH3 family protein | chr5:22131321-22133564 REVERSE LENGTH=612	28	578	27	580	PF03321.11	GH3	1	2	524	560	690.3	1.7e-207	1
AT5G54810.1 | Symbols: TSB1, TRPB, TRP2, ATTSB1 | tryptophan synthase beta-subunit 1 | chr5:22264805-22266738 REVERSE LENGTH=470	125	455	122	455	PF00291.23	PALP	1	4	294	338	163.2	8e-48	1
AT5G55660.1 | Symbols: | DEK domain-containing chromatin associated protein | chr5:22539375-22543142 FORWARD LENGTH=778	686	739	686	739	PF08766.9	DEK_C	1	1	54	54	50.4	1.4e-13	1
AT5G61030.1 | Symbols: GR-RBP3 | glycine-rich RNA-binding protein 3 | chr5:24560870-24562152 FORWARD LENGTH=309	42	112	42	112	PF00076.20	RRM_1	1	1	70	71	77.3	5.3e-22	1
AT5G61140.2 | Symbols: | U5 small nuclear ribonucleoprotein helicase | chr5:24589999-24603311 FORWARD LENGTH=2157	510	684	509	687	PF00270.27	DEAD	2	2	172	179	89.8	1.5e-25	1
AT5G61140.2 | Symbols: | U5 small nuclear ribonucleoprotein helicase | chr5:24589999-24603311 FORWARD LENGTH=2157	737	885	728	887	PF00271.29	Helicase_C	2	9	109	152	29.2	8.8e-07	1
AT5G61140.2 | Symbols: | U5 small nuclear ribonucleoprotein helicase | chr5:24589999-24603311 FORWARD LENGTH=2157	1008	1315	1008	1315	PF02889.14	Sec63	2	1	257	316	276.2	1.8e-82	1
AT5G61140.2 | Symbols: | U5 small nuclear ribonucleoprotein helicase | chr5:24589999-24603311 FORWARD LENGTH=2157	1358	1522	1357	1528	PF00270.27	DEAD		2	169	173	77	1.3e-21	1
AT5G61140.2 | Symbols: | U5 small nuclear ribonucleoprotein helicase | chr5:24589999-24603311 FORWARD LENGTH=2157	1633	1721	1571	1723	PF00271.29	Helicase_C		36	109	91	32.7	7.2e-08	1
AT5G61140.2 | Symbols: | U5 small nuclear ribonucleoprotein helicase | chr5:24589999-24603311 FORWARD LENGTH=2157	1839	2150	1839	2151	PF02889.14	Sec63		1	256	323	249.6	2.4e-74	1
AT5G60980.2 | Symbols: | Nuclear transport factor 2 (NTF2) family protein with RNA binding (RRM-RBD-RNP motifs) domain | chr5:24543988-24546027 FORWARD LENGTH=460	15	131	15	131	PF02136.18	NTF2	1	1	120	124	114.7	3.2e-33	1
AT5G60980.2 | Symbols: | Nuclear transport factor 2 (NTF2) family protein with RNA binding (RRM-RBD-RNP motifs) domain | chr5:24543988-24546027 FORWARD LENGTH=460	295	353	295	362	PF00076.20	RRM_1	1	1	58	60	43.6	1.7e-11	1
AT5G62180.1 | Symbols: AtCXE20, CXE20 | carboxyesterase 20 | chr5:24978866-24979849 REVERSE LENGTH=327	83	303	83	306	PF07859.11	Abhydrolase_3	1	1	208	228	181.7	1.5e-53	1
AT5G62190.1 | Symbols: PRH75 | DEAD box RNA helicase (PRH75) | chr5:24980542-24983879 REVERSE LENGTH=671	120	297	120	298	PF00270.27	DEAD	1	1	175	187	153.3	5e-45	1
AT5G62190.1 | Symbols: PRH75 | DEAD box RNA helicase (PRH75) | chr5:24980542-24983879 REVERSE LENGTH=671	343	441	335	441	PF00271.29	Helicase_C	1	9	111	103	89.5	1.6e-25	1
AT5G62190.1 | Symbols: PRH75 | DEAD box RNA helicase (PRH75) | chr5:24980542-24983879 REVERSE LENGTH=671	530	626	530	626	PF08152.10	GUCT	1	1	96	97	90.2	7.3e-26	1
AT5G64100.1 | Symbols: | Peroxidase superfamily protein | chr5:25650824-25652062 REVERSE LENGTH=331	53	289	50	291	PF00141.21	peroxidase	1	1	226	239	235.4	5.7e-70	1
AT5G61960.1 | Symbols: AML1, ML1 | MEI2-like protein 1 | chr5:24879001-24883483 REVERSE LENGTH=915	219	283	219	284	PF00076.20	RRM_1	2	1	69	69	37.3	1.6e-09	1
AT5G61960.1 | Symbols: AML1, ML1 | MEI2-like protein 1 | chr5:24879001-24883483 REVERSE LENGTH=915	304	368	304	369	PF00076.20	RRM_1		1	69	69	34.2	1.5e-08	1
AT5G61960.1 | Symbols: AML1, ML1 | MEI2-like protein 1 | chr5:24879001-24883483 REVERSE LENGTH=915	743	839	743	839	PF04059.10	RRM_2	1	1	97	97	187.1	3.9e-56	1
AT5G60640.1 | Symbols: ATPDIL1-4, PDI2, ATPDI2, PDIL1-4 | PDI-like 1-4 | chr5:24371141-24373993 REVERSE LENGTH=597	105	205	104	206	PF00085.18	Thioredoxin	2	2	103	103	108.1	1.7e-31	1
AT5G60640.1 | Symbols: ATPDIL1-4, PDI2, ATPDI2, PDIL1-4 | PDI-like 1-4 | chr5:24371141-24373993 REVERSE LENGTH=597	248	417	242	420	PF13848.4	Thioredoxin_6	1	15	181	174	102	3.4e-29	1
AT5G60640.1 | Symbols: ATPDIL1-4, PDI2, ATPDI2, PDIL1-4 | PDI-like 1-4 | chr5:24371141-24373993 REVERSE LENGTH=597	443	541	442	548	PF00085.18	Thioredoxin		2	97	101	74.8	4e-21	1
AT5G59710.1 | Symbols: VIP2, AtVIP2 | VIRE2 interacting protein 2 | chr5:24058157-24061736 FORWARD LENGTH=614	485	603	484	605	PF04153.16	NOT2_3_5	1	2	131	131	96.4	1.2e-27	1
AT5G58590.1 | Symbols: RANBP1 | RAN binding protein 1 | chr5:23680319-23681714 REVERSE LENGTH=219	38	155	37	159	PF00638.16	Ran_BP1	1	2	119	118	133.2	4.8e-39	1
AT5G58070.1 | Symbols: ATTIL, TIL | temperature-induced lipocalin | chr5:23500512-23501156 REVERSE LENGTH=186	13	160	13	160	PF08212.10	Lipocalin_2	1	1	143	149	186.4	2.3e-55	1
AT5G58040.1 | Symbols: ATFIP1[V], FIPS5, ATFIPS5, FIP1[V] | homolog of yeast FIP1 [V] | chr5:23488865-23494000 FORWARD LENGTH=1196	337	379	337	379	PF05182.11	Fip1	1	1	43	43	72	1.8e-20	1
AT5G56740.1 | Symbols: HAG2, HAC7, HAG02, HAC07 | histone acetyltransferase of the GNAT family 2 | chr5:22953009-22955577 REVERSE LENGTH=467	30	195	28	195	PF10394.7	Hat1_N	1	3	160	171	95	5.1e-27	1
AT5G56740.1 | Symbols: HAG2, HAC7, HAG02, HAC07 | histone acetyltransferase of the GNAT family 2 | chr5:22953009-22955577 REVERSE LENGTH=467	220	282	195	290	PF00583.23	Acetyltransf_1	1	43	101	65	26.7	4.7e-06	1
AT5G56630.1 | Symbols: PFK7 | phosphofructokinase 7 | chr5:22924311-22926728 FORWARD LENGTH=485	95	398	93	400	PF00365.18	PFK	1	3	277	311	211.8	1.1e-62	1
AT5G64250.2 | Symbols: | Aldolase-type TIM barrel family protein | chr5:25697623-25698945 REVERSE LENGTH=333	2	71	1	79	PF03060.13	NMO	2	5	72	70	46.1	3.8e-12	1
AT5G64250.2 | Symbols: | Aldolase-type TIM barrel family protein | chr5:25697623-25698945 REVERSE LENGTH=333	75	318	68	318	PF03060.13	NMO		103	331	248	161	4.4e-47	1
AT5G65020.1 | Symbols: ANNAT2 | annexin 2 | chr5:25973915-25975554 FORWARD LENGTH=317	16	79	15	80	PF00191.18	Annexin	4	2	65	64	76.7	9.7e-22	1
AT5G65020.1 | Symbols: ANNAT2 | annexin 2 | chr5:25973915-25975554 FORWARD LENGTH=317	87	152	87	152	PF00191.18	Annexin		1	66	66	61.5	5.2e-17	1
AT5G65020.1 | Symbols: ANNAT2 | annexin 2 | chr5:25973915-25975554 FORWARD LENGTH=317	171	235	170	236	PF00191.18	Annexin		2	65	65	52.9	2.6e-14	1
AT5G65020.1 | Symbols: ANNAT2 | annexin 2 | chr5:25973915-25975554 FORWARD LENGTH=317	248	311	246	311	PF00191.18	Annexin		3	66	64	64.2	7.7e-18	1
AT5G65430.3 | Symbols: GRF8 | general regulatory factor 8 | chr5:26148630-26150255 REVERSE LENGTH=260	13	238	13	238	PF00244.18	14-3-3	1	1	222	226	337.6	2.6e-101	1
AT5G65720.1 | Symbols: ATNIFS1, NIFS1, NFS1, ATNFS1 | nitrogen fixation S (NIFS)-like 1 | chr5:26296349-26297710 FORWARD LENGTH=453	56	417	55	418	PF00266.17	Aminotran_5	1	2	370	382	290.2	1.9e-86	1
AT5G65900.1 | Symbols: | DEA(D/H)-box RNA helicase family protein | chr5:26358328-26361244 FORWARD LENGTH=633	178	349	178	349	PF00270.27	DEAD	1	1	176	179	159.8	5e-47	1
AT5G65900.1 | Symbols: | DEA(D/H)-box RNA helicase family protein | chr5:26358328-26361244 FORWARD LENGTH=633	388	494	385	495	PF00271.29	Helicase_C	1	4	110	108	83.6	1e-23	1
AT5G65900.1 | Symbols: | DEA(D/H)-box RNA helicase family protein | chr5:26358328-26361244 FORWARD LENGTH=633	540	596	536	596	PF13959.4	DUF4217	1	5	61	57	60.7	1e-16	1
AT5G66680.1 | Symbols: DGL1 | dolichyl-diphosphooligosaccharide-protein glycosyltransferase 48kDa subunit family protein | chr5:26617840-26620581 REVERSE LENGTH=437	33	437	33	437	PF03345.12	DDOST_48kD	1	1	406	415	432.2	1.7e-129	1
AT5G66860.1 | Symbols: | Ribosomal protein L25/Gln-tRNA synthetase, anti-codon-binding domain | chr5:26701233-26702531 REVERSE LENGTH=249	153	238	153	239	PF14693.4	Ribosomal_TL5_C	1	1	85	86	68.3	5.1e-19	1
ATCG01310.1 | Symbols: RPL2.2 | ribosomal protein L2 | chrC:152806-154312 FORWARD LENGTH=274	40	116	40	116	PF00181.21	Ribosomal_L2	1	1	77	77	104	2.6e-30	1
ATCG01310.1 | Symbols: RPL2.2 | ribosomal protein L2 | chrC:152806-154312 FORWARD LENGTH=274	123	249	123	249	PF03947.16	Ribosomal_L2_C	1	1	126	127	179.3	2.8e-53	1
AT5G66470.1 | Symbols: | RNA binding;GTP binding | chr5:26541986-26544302 REVERSE LENGTH=427	132	249	131	249	PF01926.21	MMR_HSR1	1	2	114	119	82.6	1.9e-23	1
AT5G66470.1 | Symbols: | RNA binding;GTP binding | chr5:26541986-26544302 REVERSE LENGTH=427	332	409	332	409	PF07650.15	KH_2	1	1	78	82	51.8	4.9e-14	1
ATMG00640.1 | Symbols: ORF25 | hydrogen ion transporting ATP synthases, rotational mechanism;zinc ion binding | chrM:188084-188662 REVERSE LENGTH=192	20	184	20	184	PF05405.12	Mt_ATP-synt_B	1	1	163	167	171	1.4e-50	1
AT5G65260.1 | Symbols: | RNA-binding (RRM/RBD/RNP motifs) family protein | chr5:26080501-26082984 REVERSE LENGTH=220	94	162	94	162	PF00076.20	RRM_1	1	1	70	70	63.4	1.1e-17	1
AT5G56010.1 | Symbols: HSP81-3, Hsp81.3, AtHsp90-3, AtHsp90.3 | heat shock protein 81-3 | chr5:22681410-22683911 FORWARD LENGTH=699	27	181	27	182	PF02518.24	HATPase_c	1	1	110	157	53.3	3.2e-14	1
AT5G56010.1 | Symbols: HSP81-3, Hsp81.3, AtHsp90-3, AtHsp90.3 | heat shock protein 81-3 | chr5:22681410-22683911 FORWARD LENGTH=699	184	690	184	696	PF00183.16	HSP90	1	1	513	514	788.2	3.6e-237	1
AT5G55530.1 | Symbols: | Calcium-dependent lipid-binding (CaLB domain) family protein | chr5:22494439-22495656 FORWARD LENGTH=405	51	158	51	159	PF00168.28	C2	1	1	102	109	36.1	5.4e-09	1
AT5G55300.2 | Symbols: TOP1ALPHA | DNA topoisomerase I alpha | chr5:22424701-22429045 REVERSE LENGTH=933	370	581	369	581	PF02919.13	Topoisom_I_N	1	2	213	214	313.5	5.6e-94	1
AT5G55300.2 | Symbols: TOP1ALPHA | DNA topoisomerase I alpha | chr5:22424701-22429045 REVERSE LENGTH=933	585	809	584	810	PF01028.18	Topoisom_I	1	2	230	229	307.2	4.7e-92	1
AT5G55300.2 | Symbols: TOP1ALPHA | DNA topoisomerase I alpha | chr5:22424701-22429045 REVERSE LENGTH=933	845	909	844	912	PF14370.4	Topo_C_assoc	1	2	66	65	115.6	6.3e-34	1
AT5G55070.1 | Symbols: | Dihydrolipoamide succinyltransferase | chr5:22347637-22350409 FORWARD LENGTH=464	98	167	94	167	PF00364.20	Biotin_lipoyl	1	5	73	70	68.1	3.9e-19	1
AT5G55070.1 | Symbols: | Dihydrolipoamide succinyltransferase | chr5:22347637-22350409 FORWARD LENGTH=464	234	462	232	462	PF00198.21	2-oxoacid_dh	1	3	233	231	264.7	5.6e-79	1
AT5G54900.1 | Symbols: ATRBP45A, RBP45A | RNA-binding protein 45A | chr5:22295412-22298126 FORWARD LENGTH=387	62	129	62	132	PF00076.20	RRM_1	3	1	67	68	41.5	7.8e-11	1
AT5G54900.1 | Symbols: ATRBP45A, RBP45A | RNA-binding protein 45A | chr5:22295412-22298126 FORWARD LENGTH=387	156	225	156	227	PF00076.20	RRM_1		1	68	70	62	3.1e-17	1
AT5G54900.1 | Symbols: ATRBP45A, RBP45A | RNA-binding protein 45A | chr5:22295412-22298126 FORWARD LENGTH=387	262	326	262	326	PF00076.20	RRM_1		1	70	70	63.8	8.8e-18	1
