# Supplementary material for: Changes in the Arabidopsis RNA-binding proteome reveal novel stress response mechanisms
Source: BMC Plant Biol. 2019 Apr 11;19:139. doi: 10.1186/s12870-019-1750-x (PMC6460520; doi:10.1186/s12870-019-1750-x)
Supplement: Supplementary file 5 — Gene Ontology analysis of the significantly enriched drought stress responsive proteins performed using AgriGO software (http://bioinfo.cau.edu.cn/agriGO/). (XLSX 49 kb) [file 12870_2019_1750_MOESM5_ESM.xlsx]

## Sheet: Supplementary Table 3
Table S3. Gene Ontology analysis of the significantly enriched drought stress responsive proteins performed using AgriGO software (http://bioinfo.cau.edu.cn/agriGO/).
GO accession	GO term	Description	Number of proteins enriched	FDR	List of proteins
GO:0009987	BP	cellular process	71	0.016	AT1G13440, AT2G33340, AT1G24510, AT2G20490.1, AT4G26780.1, AT5G48180.1, AT1G07770.1, AT5G60980, AT5G12250, AT5G04590, AT3G56240, AT1G69250, AT3G58610, AT2G37690.1, AT3G44310.1, AT1G77510, AT2G40290.1, AT1G56450, AT1G10270, AT3G52880, AT3G46740.1, AT2G13540.1, AT5G50250, AT1G13730, AT1G78900, AT2G07698, AT1G17170, AT1G79280, AT4G25730.1, AT4G36020, AT3G07110.2, AT5G48180, AT5G66860, AT3G57610, AT3…
GO:0050896	BP	response to stimulus	36	0.0024	AT1G13440, AT1G04410.1, AT5G46070, AT1G62740.1, AT1G20950.1, AT5G04590, AT3G56240, AT2G13540.1, AT3G58610, AT1G20440, AT1G77510, AT5G27470, AT3G52880, AT5G12250, AT5G15970.1, AT5G50250, AT2G16060, AT2G41100.1, AT5G03740, AT3G55460.1, AT5G54430, AT4G36020, AT4G39260.1, AT2G17870, AT3G23830.1, AT4G38630.1, AT1G54100, AT4G24770, AT2G13540, AT2G05710, AT4G39260, AT5G40770, AT3G01280, AT5G54810.1, AT5…
GO:0006950	BP	response to stress	28	0.00015	AT1G13440, AT1G04410.1, AT1G62740.1, AT5G04590, AT3G56240, AT2G16060, AT1G20440, AT1G77510, AT3G52880, AT5G12250, AT5G15970.1, AT5G50250, AT4G39260.1, AT5G03740, AT3G55460.1, AT5G54430, AT4G36020, AT2G17870, AT3G23830.1, AT4G38630.1, AT1G54100, AT4G24770, AT2G05710, AT4G39260, AT5G40770, AT5G54810.1, AT5G54430.1, AT1G15690.1
GO:0042221	BP	response to chemical stimulus	22	0.0047	AT1G13440, AT1G04410.1, AT1G20950.1, AT3G56240, AT5G15970.1, AT2G16060, AT1G20440, AT5G27470, AT3G52880, AT2G13540.1, AT3G58610, AT5G03740, AT3G55460.1, AT5G54430, AT4G38630.1, AT1G54100, AT2G13540, AT2G05710, AT5G40770, AT5G54810.1, AT5G54430.1, AT1G15690.1
GO:0051179	BP	localization	19	0.019	AT4G27500, AT1G78900, AT1G13730.1, AT2G03640, AT5G48650, AT5G43960.1, AT2G07698, AT3G46740.1, AT5G13490, AT3G01280, AT1G13730, AT5G60980, AT5G43960, AT3G56240, AT1G79280, ATMG00640.1, AT1G69250, AT1G15690.1
GO:0006810	BP	transport	19	0.014	AT4G27500, AT1G78900, AT1G13730.1, AT2G03640, AT5G48650, AT5G43960.1, AT2G07698, AT3G46740.1, AT5G13490, AT3G01280, AT1G13730, AT5G60980, AT5G43960, AT3G56240, AT1G79280, ATMG00640.1, AT1G69250, AT1G15690.1
GO:0051234	BP	establishment of localization	19	0.014	AT4G27500, AT1G78900, AT1G13730.1, AT2G03640, AT5G48650, AT5G43960.1, AT2G07698, AT3G46740.1, AT5G13490, AT3G01280, AT1G13730, AT5G60980, AT5G43960, AT3G56240, AT1G79280, ATMG00640.1, AT1G69250, AT1G15690.1
GO:0009628	BP	response to abiotic stimulus	18	0.0047	AT1G20440, AT1G54100, AT4G39260.1, AT2G13540, AT2G05710, AT1G15690.1, AT5G12250, AT5G15970.1, AT3G23830.1, AT2G17870, AT5G03740, AT5G04590, AT4G39260, AT4G38630.1, AT2G13540.1, AT2G41100.1, AT4G36020, AT1G04410.1
GO:0051641	BP	cellular localization	10	0.0082	AT5G60980, AT1G13730.1, AT2G03640, AT5G48650, AT5G43960.1, AT3G46740.1, AT1G13730, AT5G43960, AT1G79280, AT1G69250
GO:0051649	BP	establishment of localization in cell	10	0.0047	AT5G60980, AT1G13730.1, AT2G03640, AT5G48650, AT5G43960.1, AT3G46740.1, AT1G13730, AT5G43960, AT1G79280, AT1G69250
GO:0009266	BP	response to temperature stimulus	10	0.0042	AT1G20440, AT4G39260.1, AT4G36020, AT4G39260, AT5G12250, AT5G15970.1, AT2G17870, AT5G04590, AT4G38630.1, AT2G41100.1
GO:0046907	BP	intracellular transport	10	0.0034	AT5G60980, AT1G13730.1, AT2G03640, AT5G48650, AT5G43960.1, AT3G46740.1, AT1G13730, AT5G43960, AT1G79280, AT1G69250
GO:0006970	BP	response to osmotic stress	9	0.0047	AT1G20440, AT1G04410.1, AT1G54100, AT2G05710, AT5G15970.1, AT3G23830.1, AT5G03740, AT4G38630.1, AT1G15690.1
GO:0051169	BP	nuclear transport	9	1.7e-08	AT5G60980, AT1G13730.1, AT2G03640, AT5G48650, AT5G43960.1, AT5G43960, AT1G13730, AT1G79280, AT1G69250
GO:0006913	BP	nucleocytoplasmic transport	9	1.7e-08	AT5G60980, AT1G13730.1, AT2G03640, AT5G48650, AT5G43960.1, AT5G43960, AT1G13730, AT1G79280, AT1G69250
GO:0006396	BP	RNA processing	8	0.022	AT5G04430.2, AT2G37340, AT3G55460.1, AT4G24770, AT2G13540, AT2G13540.1, AT4G25730.1, AT3G49430
GO:0009737	BP	response to abscisic acid stimulus	8	0.0097	AT1G20440, AT1G54100, AT2G13540, AT2G05710, AT5G15970.1, AT4G38630.1, AT2G13540.1, AT5G03740
GO:0009409	BP	response to cold	8	0.0047	AT1G20440, AT4G36020, AT4G39260, AT5G12250, AT5G15970.1, AT2G17870, AT5G04590, AT4G39260.1
GO:0009651	BP	response to salt stress	7	0.028	AT1G04410.1, AT1G54100, AT2G05710, AT3G23830.1, AT5G03740, AT4G38630.1, AT1G15690.1
GO:0006979	BP	response to oxidative stress	6	0.042	AT1G13440, AT3G55460.1, AT2G05710, AT3G52880, AT3G56240, AT5G54810.1
GO:0006457	BP	protein folding	6	0.031	AT2G29960, AT4G26780, AT4G38740.1, AT4G26780.1, AT1G24510, AT5G20890
GO:0010035	BP	response to inorganic substance	6	0.031	AT5G27470, AT2G05710, AT3G52880, AT1G04410.1, AT3G56240, AT3G58610
GO:0048229	BP	gametophyte development	6	0.016	AT2G37690.1, AT4G16280, AT1G78900, AT2G20490.1, AT4G38630.1, AT4G16280.2
GO:0008380	BP	RNA splicing	6	0.0018	AT2G37340, AT3G55460.1, AT2G13540, AT2G13540.1, AT5G04430.2, AT3G49430
GO:0009414	BP	response to water deprivation	5	0.042	AT1G54100, AT1G20440, AT1G15690.1, AT5G03740, AT5G15970.1
GO:0048580	BP	regulation of post-embryonic development	5	0.039	AT4G38630.1, AT4G16280, AT1G79280, AT3G04610.1, AT4G16280.2
GO:0043226	CC	organelle	80	7.9e-13	AT1G13440, AT3G62360, AT1G24180.1, AT5G46070, AT4G19880.2, AT4G17520.1, AT1G15690.1, AT4G16830.1, AT4G16830, AT4G38630.1, AT1G07770.1, AT2G23930, AT5G12250, AT5G04590, AT3G22330.1, AT2G13540.1, AT5G56740.1, AT3G58610, AT2G37690.1, AT3G15010.1, AT1G17210.1, AT2G40290.1, AT1G10270, AT4G09320, AT3G09630, AT3G52880, AT3G46740.1, AT5G15970.1, AT4G16280, AT1G78900, AT2G07698, AT4G16280.2, AT1G79280, AT…
GO:0043227	CC	membrane-bounded organelle	74	2e-11	AT1G13440, AT3G62360, AT1G24180.1, AT5G46070, AT4G19880.2, AT4G17520.1, AT1G15690.1, AT4G16830.1, AT4G16830, AT4G38630.1, AT1G07770.1, AT2G23930, AT5G04590, AT3G22330.1, AT2G13540.1, AT5G56740.1, AT3G58610, AT2G37690.1, AT3G15010.1, AT1G17210.1, AT2G40290.1, AT1G10270, AT4G09320, AT3G09630, AT3G52880, AT3G46740.1, AT5G15970.1, AT1G78900, AT2G07698, AT1G79280, ATMG00640.1, AT5G03740, AT2G37340, AT…
GO:0005737	CC	cytoplasm	67	2.7e-10	AT1G13440, AT1G15280.2, AT3G62360, AT1G24180.1, AT5G46070, AT4G19880.2, AT4G17520.1, AT1G15690.1, AT4G16830.1, AT4G16830, AT4G38630.1, AT1G07770.1, AT3G09630, AT5G04590, AT3G22330.1, AT3G58610, AT2G37690.1, AT1G17210.1, AT2G33340, AT3G52880, AT3G46740.1, AT5G15970.1, AT4G38740.1, AT1G78900, AT2G07698, AT1G17170, AT1G79280, ATMG00640.1, AT4G20850, AT3G07110.2, AT5G27470, AT5G66860, AT5G55530.1, AT…
GO:0005634	CC	nucleus	35	4e-08	AT5G46070, AT4G17520.1, AT4G16830.1, AT4G16830, AT3G04610.1, AT2G23930, AT1G24180.1, AT2G13540.1, AT3G15010.1, AT1G17210.1, AT2G40290.1, AT1G10270, AT5G15970.1, AT2G07698, AT1G79280, AT4G25730.1, AT3G54670, AT3G55460.1, AT5G54430, AT3G09630, AT4G19610.1, AT1G62740.1, AT1G64790, AT4G38630.1, AT5G04280, AT3G12680, AT2G17870, AT2G37340, AT2G13540, AT3G15010, AT5G56740.1, AT1G04410.1, AT2G20490.1, AT…
GO:0009536	CC	plastid	25	0.008	AT5G46070, AT4G19880.2, AT5G55530.1, AT5G13490, AT5G04590, AT3G58610, AT2G33340, AT3G46740.1, AT2G07698, AT2G37690.1, AT2G33845.1, AT4G31880, AT3G09630, AT4G39730.1, AT2G33845, AT1G53280, AT2G01210, AT2G05710, AT3G58570.1, AT5G11880, AT3G01280, AT5G54810.1, AT5G26260, AT1G04410.1, AT4G24770
GO:0009507	CC	chloroplast	23	0.013	AT5G46070, AT4G19880.2, AT5G55530.1, AT3G58610, AT2G33340, AT3G46740.1, AT2G07698, AT2G37690.1, AT2G33845.1, AT4G31880, AT3G09630, AT4G39730.1, AT2G33845, AT1G53280, AT2G01210, AT2G05710, AT3G58570.1, AT5G11880, AT3G01280, AT5G54810.1, AT5G26260, AT1G04410.1, AT4G24770
GO:0005829	CC	cytosol	22	2.4e-09	AT1G13440, AT1G15280.2, AT1G62740.1, AT1G07770.1, AT1G24180.1, AT2G17420, AT1G17210.1, AT5G27470, AT1G79280, AT1G07770, AT3G07110.2, AT2G29960, AT5G54430, AT4G31880, AT3G09630, AT1G64790, AT4G38630.1, AT5G27700, AT1G15280, AT2G17700.1, AT4G38740.1, AT5G54430.1
GO:0032991	CC	macromolecular complex	18	0.042	AT5G27700, AT1G07770, AT3G54670, AT1G16470, AT1G56450, AT2G33340, AT3G09630, AT3G46740.1, AT4G38630.1, AT1G07770.1, AT3G63460.1, AT2G23930, AT1G20950.1, AT3G22110, ATMG00640.1, AT1G52300, AT5G40770, AT3G07110.2
GO:0005739	CC	mitochondrion	18	0.00011	AT1G13440, AT5G66860, AT1G07770, AT2G17420, AT2G07698, AT2G05710, AT1G15690.1, AT3G46740.1, AT5G13490, AT5G61030, AT1G07770.1, AT3G58610, AT1G24180.1, AT3G01280, AT2G30970, AT3G22330.1, ATMG00640.1, AT5G40770
GO:0043228	CC	non-membrane-bounded organelle	18	9.3e-06	AT5G27700, AT3G15010.1, AT2G20490.1, AT3G54670, AT5G46070, AT4G16280, AT4G16280.2, AT3G15010, AT3G09630, AT1G07770.1, AT4G19610.1, AT5G12250, AT2G07698, AT1G52300, AT5G04280, AT1G07770, AT5G03740, AT3G07110.2
GO:0031974	CC	membrane-enclosed lumen	13	9.7e-06	AT3G15010.1, AT2G20490.1, AT2G17420, AT2G37340, AT5G46070, AT3G15010, AT3G52880, AT3G09630, AT3G55460.1, AT4G19610.1, AT2G07698, AT5G04280, AT5G03740
GO:0043233	CC	organelle lumen	13	9.3e-06	AT3G15010.1, AT2G20490.1, AT2G17420, AT2G37340, AT5G46070, AT3G15010, AT3G52880, AT3G09630, AT3G55460.1, AT4G19610.1, AT2G07698, AT5G04280, AT5G03740
GO:0031981	CC	nuclear lumen	11	9.7e-06	AT3G15010.1, AT2G20490.1, AT2G37340, AT5G46070, AT3G15010, AT3G09630, AT3G55460.1, AT4G19610.1, AT2G07698, AT5G04280, AT5G03740
GO:0005730	CC	nucleolus	9	6.3e-06	AT3G15010.1, AT2G20490.1, AT5G46070, AT3G15010, AT3G09630, AT4G19610.1, AT2G07698, AT5G04280, AT5G03740
GO:0031975	CC	envelope	8	0.031	AT3G01280, AT3G46740.1, AT5G13490, AT5G04590, AT2G07698, AT1G79280, ATMG00640.1, AT3G58610
GO:0031967	CC	organelle envelope	8	0.031	AT3G01280, AT3G46740.1, AT5G13490, AT5G04590, AT2G07698, AT1G79280, ATMG00640.1, AT3G58610
GO:0030312	CC	external encapsulating structure	8	0.0036	AT3G62360, AT1G28110.1, AT2G33340, AT2G05710, AT3G09630, AT2G01210, AT5G20890, AT3G58610
GO:0005618	CC	cell wall	8	0.0035	AT3G62360, AT1G28110.1, AT2G33340, AT2G05710, AT3G09630, AT2G01210, AT5G20890, AT3G58610
GO:0005773	CC	vacuole	6	0.042	AT1G04410.1, AT3G09630, AT4G39730.1, AT1G78900, AT2G07698, AT1G15690.1
GO:0022626	CC	cytosolic ribosome	6	0.026	AT5G27700, AT3G09630, AT1G07770.1, AT1G52300, AT1G07770, AT3G07110.2
GO:0005488	MF	binding	90	1.1e-09	AT1G49760, AT4G16830.1, AT4G16830, AT3G56240, AT1G50920, AT5G50250, AT2G47850, AT2G41100.1, AT1G74230, AT2G32930, AT3G54670, AT3G19130, AT5G48650, AT5G43960.1, AT2G32080, AT3G10360.1, AT3G07810, AT5G54900, AT1G64790, AT5G19350, AT1G13730.1, AT2G01210, AT2G13540, AT3G15010, AT2G05710, AT3G49430, AT1G49600, AT5G03740, AT4G00830, AT5G46070, AT1G62740.1, AT3G12680, AT1G10590, AT1G69250, AT3G58610, AT…
GO:0003676	MF	nucleic acid binding	65	6.1e-16	AT1G49760, AT1G32790.2, AT4G00830, AT1G20880, AT1G60650.1, AT4G17520.1, AT1G13020, AT4G16830.1, AT4G16830, AT3G04610.1, AT5G60980, AT5G02530, AT1G10590, AT1G69250, AT5G04280, AT3G15010.1, AT1G11650, AT2G40290.1, AT2G03640, AT3G02830.1, AT1G14170.3, AT2G13540.1, AT5G50250, AT4G16280, AT1G13730, AT2G47850, AT4G27000, AT2G07698, AT2G33410, AT4G39260.1, AT1G74230, AT2G32930, AT5G18550, AT3G55460.1, A…
GO:0003723	MF	RNA binding	50	2.5e-29	AT1G49760, AT1G32790.2, AT4G00830, AT1G20880, AT1G60650.1, AT4G17520.1, AT4G16830.1, AT4G16830, AT1G69250, AT5G04280, AT3G15010.1, AT2G40290.1, AT2G03640, AT1G14170.3, AT2G13540.1, AT5G50250, AT4G16280, AT1G13730, AT4G27000, AT2G07698, AT2G33410, AT4G39260.1, AT1G74230, AT5G60980, AT3G55460.1, AT3G19130, AT5G48650, AT4G36020, AT5G43960.1, AT5G43960, AT3G10360.1, AT3G07810, AT3G23830.1, AT4G19610.…
GO:0000166	MF	nucleotide binding	32	1.3e-07	AT4G00830, AT5G46070, AT1G60650.1, AT5G02530, AT1G69250, AT1G20880, AT3G15010.1, AT1G50920, AT2G03640, AT2G33340, AT1G13730, AT1G78900, AT2G33410, AT5G60980, AT3G54670, AT2G37690.1, AT5G48650, AT5G43960.1, AT5G43960, AT3G07810, AT4G19610.1, AT1G03457, AT5G04280, AT4G09320, AT1G13730.1, AT2G01210, AT3G15010, AT2G05710, AT3G58570.1, AT1G24510, AT5G20890, AT5G27470
GO:0008135	MF	translation factor activity, nucleic acid binding	5	0.03	AT1G49760, AT2G40290.1, AT2G23350, AT1G13020, AT1G04170.1
GO:0003743	MF	translation initiation factor activity	5	0.0049	AT1G49760, AT2G40290.1, AT2G23350, AT1G13020, AT1G04170.1
	BP - Biological processes
	CC- Cellular component
	MF- Molecular function
